# Supplementary material for: Dual aggregation-induced emission enhancement (AIEE) and crosslink-enhanced emission (CEE) driven via halogen-bond-assisted cocrystallization and radical solid-phase polymerization
Source: Royal Society of Chemistry journal article supplement (doi:10.1039/d4py00533c), 2024-01-01
Supplement: d4py00533c1.pdf [file d4py00533c1.pdf]

## **Electronic Supplementary Information**

# **Dual Aggregation-Induced Emission Enhancement (AIEE) and Crosslink-Enhanced Emission (CEE) Driven via Halogen-Bond-Assisted Cocrystallization and Radical Solid-Phase Polymerization**

**Hong Tho Le<sup>1</sup>, Chelsea Violita Stanley<sup>1</sup>, Atsushi Goto<sup>1</sup>**

---

<sup>1</sup>School of Chemistry, Chemical Engineering and Biotechnology, Nanyang Technological University, 62 Nanyang Drive, 637459 Singapore (Singapore)

---

## 1. Materials

*trans*-4,4'-Dibromostilbene (DBSB) (95%, Sigma-Aldrich, USA), 2,5-dibromoterephthalaldehyde (DBTPA) (>97%, Tokyo Chemical Industry (TCI), Japan), *trans*-4-bromocinnamaldehyde (BCA) (97%, Sigma-Aldrich), 5-bromo-2,3-dimethoxybenzaldehyde (BDMB) (97%, Sigma-Aldrich), 1,2,4,5-tetrabromobenzene (4BB) (97%, Sigma-Aldrich), 1,4-diiodotetrafluorobenzene (I-C<sub>6</sub>F<sub>4</sub>-I) (98%, Sigma-Aldrich), 4-vinylpyridine (4VP) (95%, Sigma-Aldrich), 1-vinyl-2-pyrrolidone (NVP) (>99%, TCI), 2,2-dimethoxy-2-phenylacetophenone (DMPA) (99%, Sigma-Aldrich), ethylene glycol dimethacrylate (EGDMA) (98%, Sigma-Aldrich), dichloromethane (CH<sub>2</sub>Cl<sub>2</sub>) (99.8%, Fisher Scientific, USA), ethanol (≥99.5%, absolute, Fisher Scientific), *N,N*-dimethylformamide (DMF) (>99.5%, Kanto Chemical, Japan), toluene (HPLC grade, ≥99.5%, Fisher Scientific), ethanol (EtOH) (≥99.5%, absolute, Fisher Scientific), hexane (>99%, International Scientific, Singapore)  $\alpha,\alpha,\alpha$ -trifluorotoluene (or trifluoromethylbenzene) (PhCF<sub>3</sub>) (≥99%, Sigma-Aldrich), deuterated chloroform (CDCl<sub>3</sub>) (99.8%D, Cambridge Isotope Laboratories, USA), deuterated dimethyl sulfoxide (DMSO-*d*<sub>6</sub>) (99.9%D, Cambridge Isotope Laboratories), lithium bromide (LiBr) (>99%, TCI), potassium bromide (KBr) (≥99%, trace metals basis, Sigma-Aldrich), poly(4-vinyl pyridine) (P4VP) (molecular weight = ca. 60000) (Sigma-Aldrich), and poly(methyl methacrylate) (PMMA) (molecular weight = ca. 50000, nominal  $M_p$  = 46890) (Agilent, US) were used as received.

## 2. Measurement

<sup>1</sup>H NMR spectra were recorded at room temperature on a Bruker (Germany) BBFO400 spectrometer (400 MHz) and AV400 spectrometer (400 MHz). CDCl<sub>3</sub> and DMSO-*d*<sub>6</sub> were used as NMR solvents. The residual non-deuterated solvents were used as the internal standards for <sup>1</sup>H NMR analysis.

---

The GPC analysis was performed on a Shimadzu (Kyoto, Japan) LC-2030C Plus liquid chromatograph equipped with two Shodex LF-804 columns (300 × 8.0 mm; bead size = 6 μm; pore size = 1500 Å) and one Shodex KD-802 column (300 × 8.0 mm; bead size = 6 μm; pore size = 150 Å) (DMF). The eluent was DMF (containing 10 mM of LiBr) at a flow rate of 0.34 mL/min (40 °C). Sample detection was conducted using a Shimadzu differential refractometer detector RID-20A. The column system was calibrated with standard polystyrenes.

The Fourier-transform infrared spectroscopy (FTIR) was carried out on a Bruker (Bruker, US) ALPHA FTIR spectrometer. KBr was used as a matrix for FTIR.

The UV light source was a UV-LED light (365 (± 10) nm wavelength, 900 mW/cm<sup>2</sup>, C14052-0-A5 models (Hamamatsu Photonics, Japan)). The polymer sheets were moulded using a 2T Mini-Pellet Press (Specac, UK) with a diameter of 7 mm.

The thermal analysis of the polymers were performed with a thermal gravimetric analysis (TGA) Q500 (TA instrument, New Castle, US). The TGA analysis was carried out in platinum pans under flowing air from 25 to 600 °C.

The fluorescence spectra in solid state were measured using a Fluoromax 4 spectrometer (HORIBA, Japan). The excitation wavelengths were 405 nm and 488 nm. The sample masses were 0.10 g. All the samples were rounded shape (diameter 7 mm and thickness 1 mm).

Confocal Raman spectroscopy: Raman spectra were recorded in the 100–3000 cm<sup>-1</sup> range using a LabRAM HR Evolution Raman microscope equipped with an Olympus BX41 optical microscope and a 100× objective. A 633 nm helium–neon laser was used as excitation source for all experiments.

The confocal fluorescence images were taken with Zeiss LSM 710 Confocal (Observer Z1, Germany) using the filter set 38 under autoexposure. The laser filters used are a green laser filter (excitation wavelength ( $\lambda_{ex}$ ) = 488 nm and emission wavelength ( $\lambda_{em}$ ) = 493–635 nm)

and a blue laser filter ( $\lambda_{\text{ex}} = 405 \text{ nm}$  and  $\lambda_{\text{em}} = 410\text{--}585 \text{ nm}$ ). The emission intensities were analyzed using Zeiss ZEN blue software at  $\lambda_{\text{em}} = 564 \text{ nm}$  and  $498 \text{ nm}$ .

The powder X-ray diffraction (PXRD) analysis was carried out with a BRUKER D8 ADVANCE (Bruker) from  $10.000^\circ$  to  $79.994^\circ$  (step size  $0.020$ ) using  $\text{CuK}\alpha$  radiation ( $\lambda = 1.541874 \text{ \AA}$ ). The parameters ( $2\theta$ ) and full width of half maximum (FWHM) shown in Table S2 were obtained from the PXRD spectra and data calculated from Match! software. The crystallite size was calculated using the modified Scherrer equation (least square). The distance/plane spacing between layers ( $d_{\text{hkl}}$ ), microstrain ( $\varepsilon$ ), crystallite size ( $D$ ), and dislocation density ( $\delta$ ) were calculated from the following formula:

$$\text{Scherrer equation: } \ln \beta = \ln \frac{1}{\cos \theta} + \ln \frac{K\lambda}{D} = \ln \frac{1}{\cos \theta} + \text{intercept } b \quad (1)$$

$$\text{Crystallite size } (D) = \frac{K\lambda}{e^{\text{intercept } b}} \text{ [nm]} \quad (2)$$

$$\text{Layer spacing } (d_{\text{hkl}}) = \frac{n\lambda}{2\sin\theta} \text{ [nm]} \quad (3)$$

$$\text{Microstrain } (\varepsilon) = \frac{\text{radians(FWHM)}}{4\tan\theta} \quad (4)$$

$$\text{Dislocation density } (\delta) = \frac{1}{D^2} \text{ [nm}^{-2}\text{]} \quad (5)$$

Where:

$\beta$  is the radians of FWHM;

$\theta$  is the incident angle (the angle between the incident ray and the scatter plane) [ $^\circ$ ];

$K$  is the Scherrer constant, which is a dimensionless shape factor ( $K = 0.9$ );

$\lambda$  is the radiation wavelength ( $\lambda = 0.1541874 \text{ nm}$ );

$D$  is crystallite size [nm] in the powder sample and was obtained from the intercept of the plot of  $\ln\beta$  vs  $\ln(1/\cos\theta)$  according to equation (1) (or (2));

$n$  is an integer ( $n = 1$ ).

---

### 3. Synthetic Procedures<sup>1</sup>

#### **General Procedure for Synthesis of Four-Component Monomer Cocrystal Solids Using Five Linkers (1–5) and Two Vinyl Monomers (6–7) via Evaporation Method**

In a typical run, linker **1** (0.634 g, 1.88 mmol), monomer **7** (0.417 g, 3.75 mmol), photoinitiator DMPA (14.4 mg, 56.2  $\mu$ mol), and a crosslinkable monomer EGDMA (0.297 g, 1.50 mmol) were dissolved in dichloromethane (18.75 mL) in a flask. Slow evaporation of dichloromethane was performed using a rotary evaporator to obtain a four-component monomer solid (**1·7·DMPA·EGDMA**) within one hour. The four-component solids of other monomer cocrystal solids were prepared similarly (with the Br/monomer molar ratio = 1/1).

#### **General Procedure for Free-Radical SPPs of Four-Component Monomer Solids (Containing Monomer, Linker, DMPA, and EGDMA)**

In a typical run, the four-component monomer cocrystal solid (**1·7**) prepared as described above was moulded using a mini-hand hydraulic press to form a monomer sheet with a rounded shape (diameter 7 mm and thickness 1 mm), and the sheet was put in a 4 mL glass vial. The vial was capped with a rubber septum and was degassed with an argon flow for 10 min. The sheet was then irradiated with UV light ( $\lambda = 365$  nm) at room temperature for 24 h to obtain the four-component polymer sheet of P(**1·7**). The four-component monomer cocrystal solids (**1·6**, **2·6**, **3·6**, **4·6**, **5·6**, **2·7**, **3·7**, **4·7**, and **5·7**) were polymerized similarly.

For purification, the polymer sheets were washed (immersed) in a mixture of ethanol (10 mL) and toluene (10 mL) (50/50 v/v%), or DMF (20 mL), and sonicated (30 min) to fully remove the linkers and the unreacted monomers, DMPA, and EGDMA, giving purified polymer sheets, poly(4-vinyl pyridine) (P4VP) or poly(*N*-vinyl pyrrolidone) (PNVP) sheets, with the retained round shape as the final products.

**General Procedure for Free-Radical SPPs of Three-Component Monomer Solids  
(Containing Monomer, Linker, and DMPA)**

The three-component monomer solids containing monomers (**6** and **7**), linkers (**1–5**), and photo-initiator DMPA were prepared and used for free-radical SPP in a similar manner as described above (Table S1).

**Table S1** Free-radical SPPs of three-component solids (containing monomer, linker, and DMPA) at room temperature under UV irradiation ( $\lambda = 365$  nm) for 24 h

| Entry | Linker·M <sup>a</sup> | [M] <sub>0</sub> /[Linker] <sub>0</sub><br>/[DMPA] <sub>0</sub> <sup>b</sup> | Monomer<br>conversion<br>(%) | M <sub>p</sub> <sup>c</sup> | M <sub>n</sub> <sup>c</sup> | $\bar{D}$ <sup>c</sup> |
|-------|-----------------------|------------------------------------------------------------------------------|------------------------------|-----------------------------|-----------------------------|------------------------|
| 1     | <b>1·6</b>            | 2/1/0.03                                                                     | 91                           | 16000                       | NA                          | NA                     |
| 2     | <b>2·6</b>            | 2/1/0.03                                                                     | 88                           | 5900                        | NA                          | NA                     |
| 3     | <b>3·6</b>            | 1/1/0.03                                                                     | 89                           | 5500                        | NA                          | NA                     |
| 4     | <b>4·6</b>            | 1/1/0.03                                                                     | 92                           | 2200                        | NA                          | NA                     |
| 5     | <b>5·6</b>            | 4/1/0.03                                                                     | 99                           | 93000                       | 80000                       | 1.64                   |
| 6     | <b>1·7</b>            | 2/1/0.03                                                                     | 91                           | 7300                        | NA                          | NA                     |
| 7     | <b>2·7</b>            | 2/1/0.03                                                                     | 100                          | 5000                        | NA                          | NA                     |
| 8     | <b>3·7</b>            | 1/1/0.03                                                                     | 100                          | 5000                        | NA                          | NA                     |
| 9     | <b>4·7</b>            | 1/1/0.03                                                                     | 88                           | 2100                        | NA                          | NA                     |
| 10    | <b>5·7</b>            | 4/1/0.03                                                                     | 97                           | 42000                       | NA                          | NA                     |

<sup>a</sup> Combination of linker and monomer. <sup>b</sup> Polymerization in the solid phase under UV irradiation ( $\lambda = 365$  nm) at room temperature for 24 h. <sup>c</sup> Polystyrene (PSt)-calibrated GPC values. DMF was used as the GPC eluent. M<sub>p</sub> is the peak-top molecular weight. In most cases, the GPC baseline was not horizontal, hence, the M<sub>n</sub> and  $\bar{D}$  values were not accurately determined, and we studied the M<sub>p</sub> values instead.

**Solution-Phase Free Radical Polymerization of Monomer (**6** and **7**) (with EGDMA)  
(Comparison Experiment)**

Monomer (**6** (42.0 mg, 0.4 mmol) or **7** (44.4 mg, 0.4 mmol)), DMPA (1.54 mg, 6.0 mmol), and EGDMA (31.7 mg, 0.16 mmol) were dissolved in dichloromethane (2 mL) in a glass vial,

---

which was capped and deoxygenated with an argon flow for 10 min. The obtained solutions in the vials were irradiated with UV light ( $\lambda = 365$  nm) at room temperature for 24 h to generate covalently crosslinked polymers. The polymers were washed with a mixture of ethanol and toluene (50/50 v/v%) (4 mL) for 30 min to remove the unreacted monomers, DMPA, and EGDMA. The purified polymers were dried, yielding covalently crosslinked P4VP and PNVP as the final products, which were analyzed using PXRD (for P4VP and PNVP) and CM (for P4VP).

#### 4. Stimuli-Responsive Emissive Polymer Sheets

**Temperature.** A covalently crosslinked four-component polymer sheet **P(5·6)** was covered with the aluminium foil and consequently heated from 22 °C (room temperature) to 30 °C, 50 °C, 70 °C, 100 °C, 120 °C, and 150 °C using a heater plate with the temperature controller. The polymer sheet was then cooled back to 22 °C. The polymer sheet was kept for 20 min at each temperature to ensure the well-distributed temperature on the sheet, and then immediately analyzed using CM.

**pH.** The polymer sheets **P(5·6)** were individually immersed in 4 mL vials containing pH-standard solutions with pH = 2.0, 7.0, and 11.0, and sonicated for 30 min. The polymer sheets were then taken out of the solutions, rinsed with CH<sub>2</sub>Cl<sub>2</sub> to remove the residual ions adsorbed on the polymer surfaces, quickly dried with a nitrogen (N<sub>2</sub>) flow, and analyzed using CM.

**Solvent.** The polymer sheets **P(5·6)** were immersed separately in 4 mL vials of toluene, *N,N*-dimethylformamide (DMF), ethanol (EtOH), 1,4-diodotetrafluorobenzene (I-C<sub>6</sub>F<sub>4</sub>-I, 0.1 M) dissolved in CH<sub>2</sub>Cl<sub>2</sub>, trifluoromethylbenzene (PhCF<sub>3</sub>), and dichloromethane (CH<sub>2</sub>Cl<sub>2</sub>) and sonicated for 30 min. The polymer sheets were then taken out of the solutions, rinsed

---

with CH<sub>2</sub>Cl<sub>2</sub> to remove the residual linker **5** adsorbed on the polymer surfaces, quickly dried with an N<sub>2</sub> flow, and analyzed using CM.

**Host-Guest Interaction.** The polymer sheet **P(5·6)** consecutively underwent reversible unloading-loading circles of different linkers **1–5**. The polymer sheet **P(5·6)** was first immersed in DMF (4 mL) with sonication (30 min) to completely remove linker **5**, subsequently re-immersed in a solution of linker **5** (0.05 M in CH<sub>2</sub>Cl<sub>2</sub>) with sonication for 30 min, to re-embed the linker **5**. Similarly, linkers **2**, **4**, **3**, and **1** were sequentially embedded and analyzed using CM for steps 1–12. After step 12, the purified P4VP polymer sheet was divided into two parts and re-embedded separately in two mixtures. Mixture 1 contained linkers **4** and **5** (0.05 M in CH<sub>2</sub>Cl<sub>2</sub>) (step 13) and mixture 2 contained all linkers **1–5** (0.05 M in CH<sub>2</sub>Cl<sub>2</sub>) (step 14). The re-embedded polymer sheets were then taken out of the solutions, rinsed with CH<sub>2</sub>Cl<sub>2</sub> to remove the residual linker **5** adsorbed on the polymer surfaces, quickly dried with an N<sub>2</sub> flow, and analyzed using CM.



## 5. Raman spectra

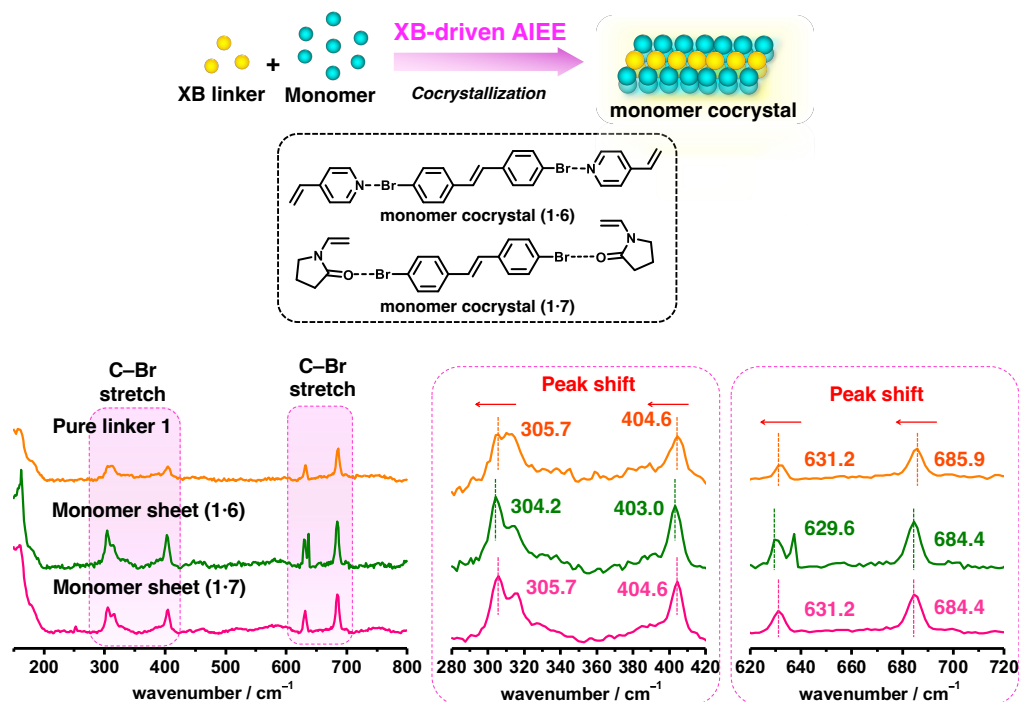

**Fig. S1.** Raman spectra of pure linker **1** (orange), monomer cocrystal solid (**1·6**) (green), and monomer cocrystal solid (**1·7**) (pink), and the zoom-in spectra for the C–Br stretching of the linker.

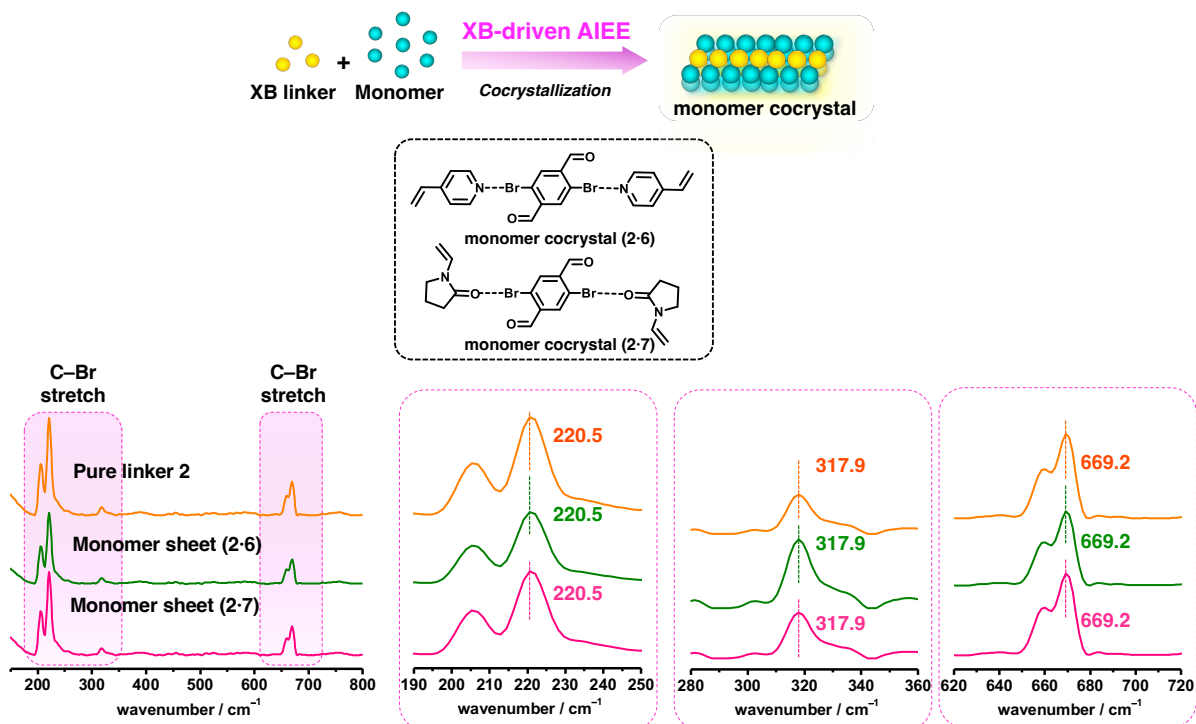

**Fig. S2.** Raman spectra of pure linker **2** (orange), monomer cocrystal solid (**2·6**) (green), and monomer cocrystal solid (**2·7**) (pink), and the zoom-in spectra for the C–Br stretching of the linker.

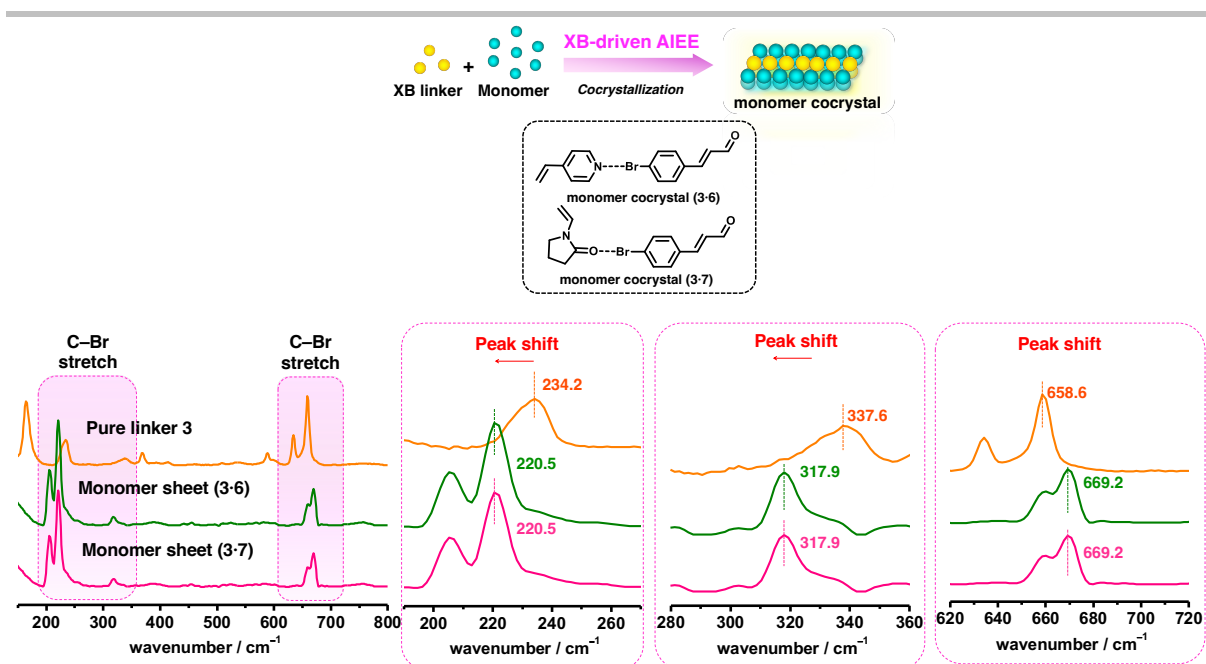

**Fig. S3.** Raman spectra of pure linker **3** (orange), monomer cocrystal solid (**3·6**) (green), and monomer cocrystal solid (**3·7**) (pink), and the zoom-in spectra for the C-Br stretching of the linker.

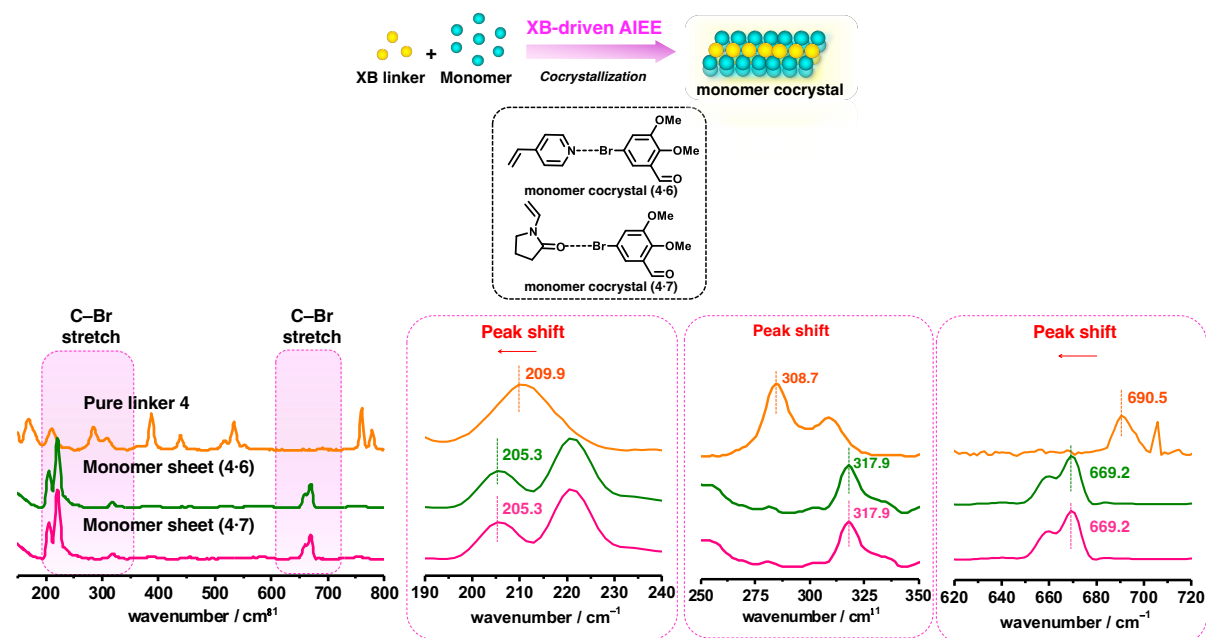

**Fig. S4.** Raman spectra of pure linker **4** (orange), monomer cocrystal solid (**4·6**) (green), and monomer cocrystal solid (**4·7**) (pink), and the zoom-in spectra for the C-Br stretching of the linker.

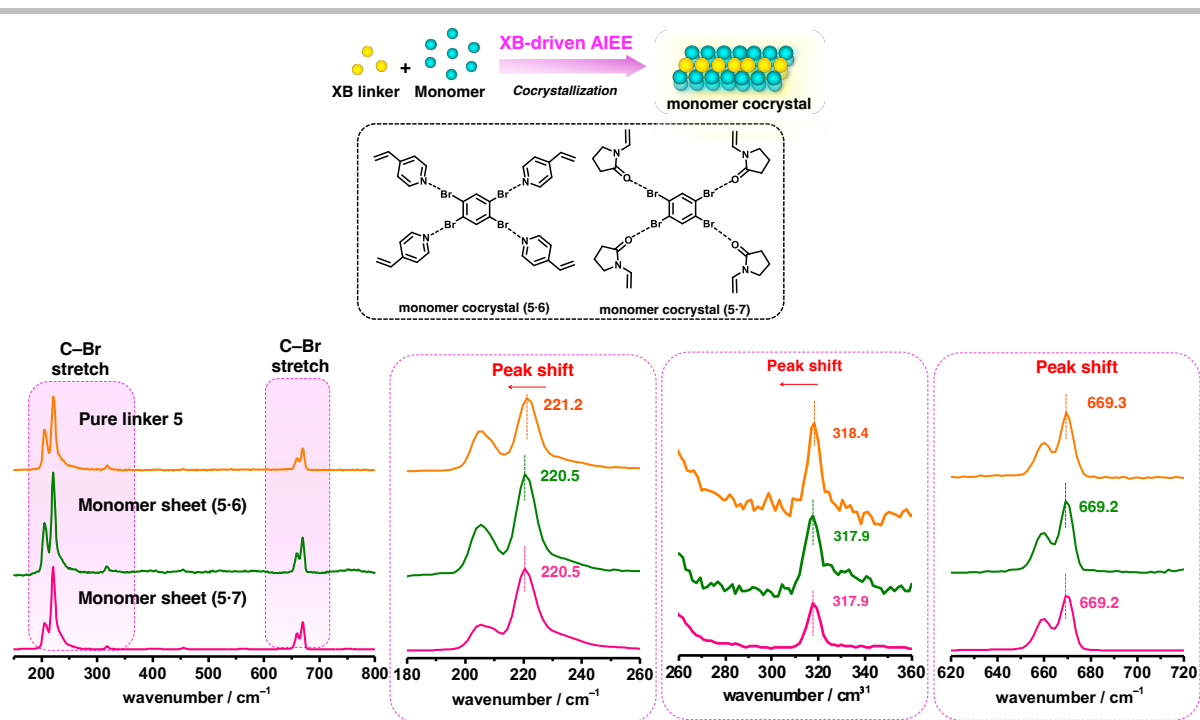

**Fig. S5.** Raman spectra of pure linker **5** (orange), monomer cocrystal solid (**5·6**) (green), and monomer cocrystal solid (**5·7**) (pink), and the zoom-in spectra for the C–Br stretching of the linker.

## 6. X-ray powder diffraction (PXRD) data

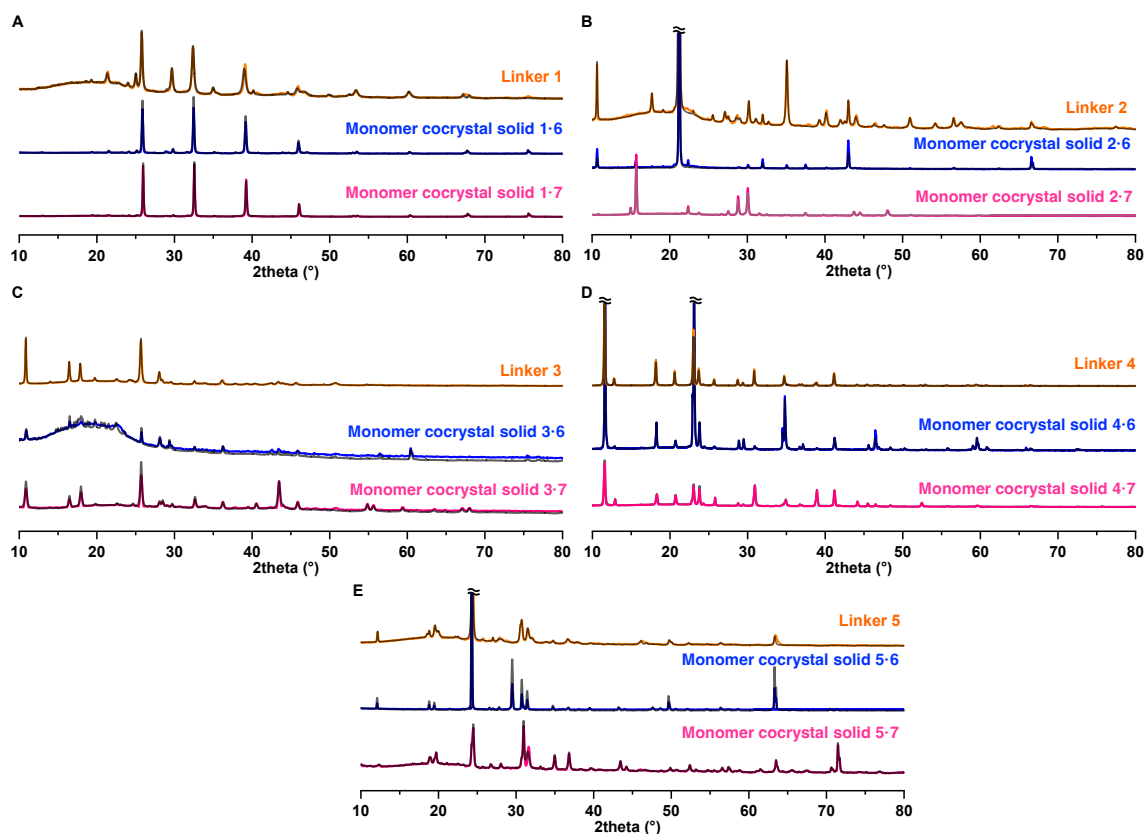

**Fig. S6.** Experimental PXRD patterns of pure linkers (orange), 4-component monomer cocrystal solids with monomer 6 (blue), 4-component monomer cocrystal solids with monomer 7 (pink), and their calculated PXRD patterns (grey) (overlapped with the experimental PXRD patterns). (A) pure linker 1, 4-component monomer cocrystal solids 1·6 and 1·7. (B) pure linker 2, 4-component monomer cocrystal solids 2·6 and 2·7. (C) pure linker 3, 4-component monomer cocrystal solids 3·6 and 3·7. (D) pure linker 4, 4-component monomer cocrystal solids 4·6 and 4·7. (E) pure linker 5, 4-component monomer cocrystal solids 5·6 and 5·7.

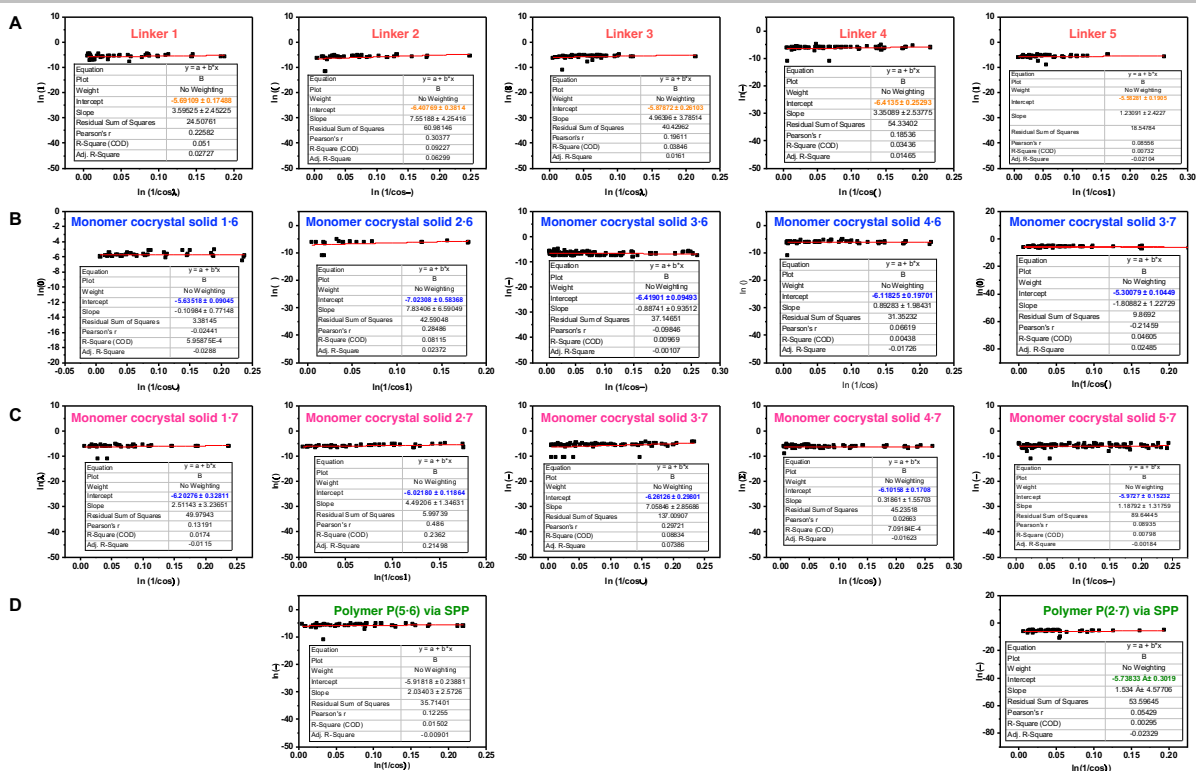

**Fig. S7.** Modified Scherrer equation fittings (least square method) for plots of  $\ln(\beta)$  vs  $\ln(1/\cos\theta)$  from experimental PXRD patterns (Figs. 2, S6, and S8; Equation (1); and Table S2). (A) pure linkers 1–5, (B) 4-component monomer cocrystal solids 1·6, 2·6, 3·6, 4·6, and 5·6, (C) 4-component monomer cocrystal solids 1·7, 2·7, 3·7, 4·7, and 5·7, and (D) polymers P(2·7) and P(5·6) obtained from free-radical SPP of the 4-component monomer cocrystal solids 2·7 and 5·6, respectively.

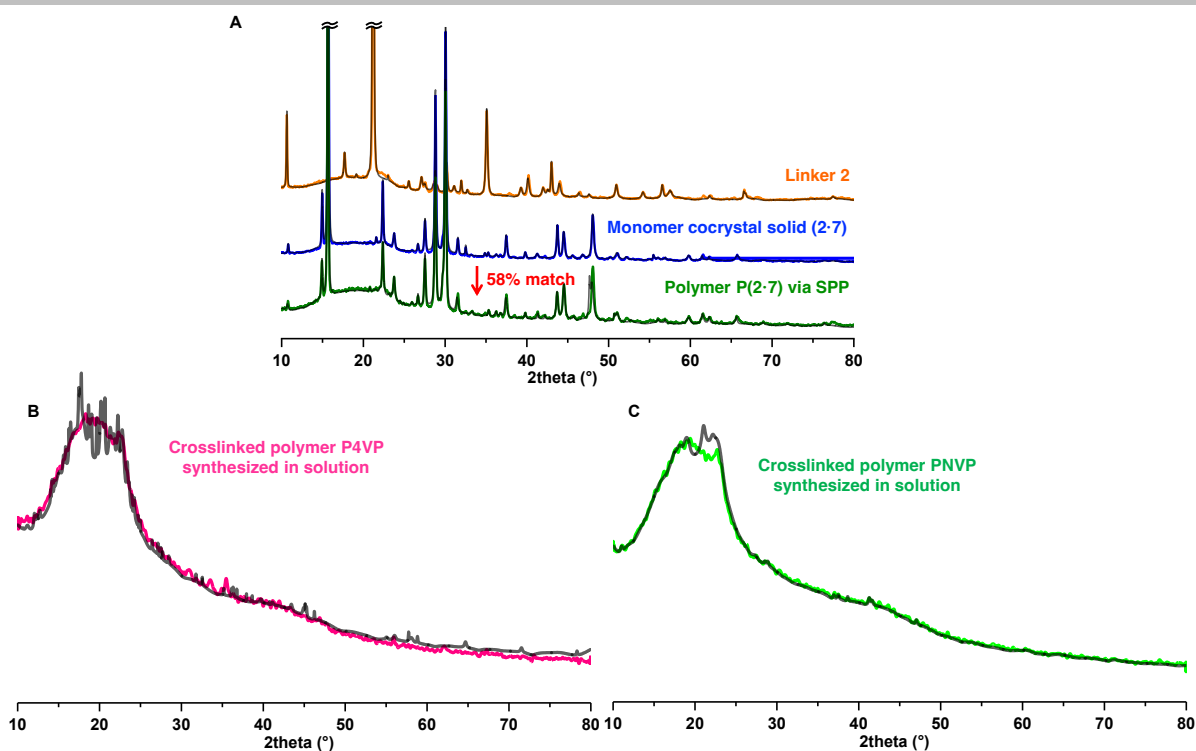

**Fig. S8.** Experimental PXRD patterns of (A) linker **2** (orange), 4-component monomer cocrystal solid **2·7** (blue), and polymer **P(2·7)** (green) obtained from free-radical SPP of the 4-component monomer cocrystal solid **2·7**, (B) crosslinked polymer P4VP synthesized in the solution phase (pink), and (C) crosslinked polymer PNVP synthesized in the solution phase (green) and their calculated PXRD patterns (grey) (overlapped with the experimental PXRD patterns).

**Table S2** Powder X-ray diffraction (PXRD) data of pure linkers (1–5), 4-component monomer cocrystals of linkers (1–5) and monomers (6–7), and two presentative obtained polymers **P(5·6)** and **P(2·7)** (Figs. 2 and S6–S8)

| Entry | Compound              | $2\theta$ (°) <sup>a</sup> | FWHM (°) <sup>a</sup> | $d_{hkl}$ spacing (nm) <sup>b</sup> | Microstrain ( $\epsilon$ ) <sup>c</sup> | Crystallite (grain) size ( $D$ ) (nm) <sup>d</sup> | Dislocation density ( $\square$ ) (nm <sup>-2</sup> ) <sup>e</sup> | $R_p$ (%) <sup>f</sup> | Match ratio (%) <sup>g</sup> |
|-------|-----------------------|----------------------------|-----------------------|-------------------------------------|-----------------------------------------|----------------------------------------------------|--------------------------------------------------------------------|------------------------|------------------------------|
| 1     | XB linker<br><b>1</b> | 11.09                      | 0.2891                | 0.797844                            | 0.01299355                              | 0.975911                                           | 1.049976                                                           | 7.2                    | NA                           |
|       |                       | 12.48                      | 0.7110                | 0.709277                            | 0.02837286                              |                                                    |                                                                    |                        |                              |
|       |                       | 12.85                      | 0.4909                | 0.688936                            | 0.01902104                              |                                                    |                                                                    |                        |                              |
|       |                       | 13.93                      | 0.7110                | 0.635756                            | 0.02539463                              |                                                    |                                                                    |                        |                              |
|       |                       | 14.27                      | 0.0468                | 0.620684                            | 0.00163132                              |                                                    |                                                                    |                        |                              |
|       |                       | 14.52                      | 0.4061                | 0.610053                            | 0.01390924                              |                                                    |                                                                    |                        |                              |
|       |                       | 15.10                      | 0.4298                | 0.586749                            | 0.01414932                              |                                                    |                                                                    |                        |                              |
|       |                       | 16.12                      | 0.2370                | 0.549844                            | 0.00730256                              |                                                    |                                                                    |                        |                              |
|       |                       | 16.50                      | 0.0790                | 0.537266                            | 0.00237737                              |                                                    |                                                                    |                        |                              |
|       |                       | 16.76                      | 0.0790                | 0.528989                            | 0.00233997                              |                                                    |                                                                    |                        |                              |
|       |                       | 17.36                      | 0.0790                | 0.510839                            | 0.00225791                              |                                                    |                                                                    |                        |                              |
|       |                       | 17.71                      | 0.0790                | 0.500822                            | 0.00221259                              |                                                    |                                                                    |                        |                              |
|       |                       | 18.54                      | 0.0790                | 0.478584                            | 0.00211191                              |                                                    |                                                                    |                        |                              |
|       |                       | 18.72                      | 0.0790                | 0.474023                            | 0.00209124                              |                                                    |                                                                    |                        |                              |
|       |                       | 19.29                      | 0.0790                | 0.460143                            | 0.00202831                              |                                                    |                                                                    |                        |                              |
|       |                       | 21.34                      | 0.3243                | 0.416380                            | 0.00751036                              |                                                    |                                                                    |                        |                              |
|       |                       | 22.82                      | 0.6848                | 0.389700                            | 0.01480551                              |                                                    |                                                                    |                        |                              |
|       |                       | 24.01                      | 0.1815                | 0.370648                            | 0.00372420                              |                                                    |                                                                    |                        |                              |
|       |                       | 25.02                      | 0.2138                | 0.355910                            | 0.00420447                              |                                                    |                                                                    |                        |                              |
|       |                       | 25.78                      | 0.2312                | 0.345588                            | 0.00440819                              |                                                    |                                                                    |                        |                              |
|       |                       | 28.98                      | 0.0790                | 0.308115                            | 0.00133383                              |                                                    |                                                                    |                        |                              |
|       |                       | 29.23                      | 0.2765                | 0.305536                            | 0.00462670                              |                                                    |                                                                    |                        |                              |
|       |                       | 29.66                      | 0.2765                | 0.301204                            | 0.00455660                              |                                                    |                                                                    |                        |                              |
|       |                       | 32.39                      | 0.3208                | 0.276413                            | 0.00481955                              |                                                    |                                                                    |                        |                              |
|       |                       | 34.98                      | 0.2863                | 0.256518                            | 0.00396443                              |                                                    |                                                                    |                        |                              |
|       |                       | 35.40                      | 0.3950                | 0.253570                            | 0.00540048                              |                                                    |                                                                    |                        |                              |
|       |                       | 38.99                      | 0.4384                | 0.231010                            | 0.00540331                              |                                                    |                                                                    |                        |                              |
|       |                       | 39.59                      | 0.0318                | 0.227646                            | 0.00038551                              |                                                    |                                                                    |                        |                              |
|       |                       | 40.19                      | 0.2404                | 0.224385                            | 0.00286715                              |                                                    |                                                                    |                        |                              |
|       |                       | 44.61                      | 0.1720                | 0.203126                            | 0.00182943                              |                                                    |                                                                    |                        |                              |
|       |                       | 45.81                      | 0.4514                | 0.198080                            | 0.00466157                              |                                                    |                                                                    |                        |                              |
|       |                       | 46.46                      | 0.6741                | 0.195459                            | 0.00685269                              |                                                    |                                                                    |                        |                              |
|       |                       | 46.80                      | 0.4678                | 0.194118                            | 0.00471685                              |                                                    |                                                                    |                        |                              |
|       |                       | 47.19                      | 0.3311                | 0.192605                            | 0.00330757                              |                                                    |                                                                    |                        |                              |
| 49.84 | 0.2692                | 0.182967                   | 0.00252816            |                                     |                                         |                                                    |                                                                    |                        |                              |
| 50.12 | 0.2498                | 0.182011                   | 0.00233105            |                                     |                                         |                                                    |                                                                    |                        |                              |
| 52.53 | 0.3771                | 0.174214                   | 0.00333436            |                                     |                                         |                                                    |                                                                    |                        |                              |
| 53.37 | 0.5282                | 0.171668                   | 0.00458539            |                                     |                                         |                                                    |                                                                    |                        |                              |
| 60.01 | 0.2442                | 0.154164                   | 0.00184517            |                                     |                                         |                                                    |                                                                    |                        |                              |
| 60.22 | 0.5378                | 0.153677                   | 0.00404646            |                                     |                                         |                                                    |                                                                    |                        |                              |
| 67.20 | 0.2370                | 0.139311                   | 0.00155646            |                                     |                                         |                                                    |                                                                    |                        |                              |
| 67.97 | 0.1975                | 0.137920                   | 0.00127833            |                                     |                                         |                                                    |                                                                    |                        |                              |
| 2     | XB linker<br><b>2</b> | 10.63                      | 0.1093                | 0.832264                            | 0.00512635                              | 0.978576                                           | 1.044265                                                           | 9.1                    | NA                           |
|       |                       | 17.70                      | 0.2057                | 0.501102                            | 0.00576445                              |                                                    |                                                                    |                        |                              |
|       |                       | 19.15                      | 0.1975                | 0.463475                            | 0.00510856                              |                                                    |                                                                    |                        |                              |
|       |                       | 20.63                      | 0.0007                | 0.430547                            | 1.6782E-05                              |                                                    |                                                                    |                        |                              |
|       |                       | 21.20                      | 0.1296                | 0.419098                            | 0.00302165                              |                                                    |                                                                    |                        |                              |
|       |                       | 21.75                      | 0.0007                | 0.408623                            | 1.5898E-05                              |                                                    |                                                                    |                        |                              |
|       |                       | 23.02                      | 0.0790                | 0.386359                            | 0.00169275                              |                                                    |                                                                    |                        |                              |
|       |                       | 25.56                      | 0.1901                | 0.348512                            | 0.00365682                              |                                                    |                                                                    |                        |                              |
|       |                       | 27.11                      | 0.2603                | 0.328928                            | 0.00471091                              |                                                    |                                                                    |                        |                              |
|       |                       | 27.50                      | 0.2843                | 0.324351                            | 0.00506948                              |                                                    |                                                                    |                        |                              |
|       |                       | 28.58                      | 0.3053                | 0.312335                            | 0.00522994                              |                                                    |                                                                    |                        |                              |
|       |                       | 29.02                      | 0.3412                | 0.307699                            | 0.00575249                              |                                                    |                                                                    |                        |                              |
|       |                       | 30.19                      | 0.2169                | 0.296036                            | 0.00350875                              |                                                    |                                                                    |                        |                              |
|       |                       | 31.11                      | 0.2346                | 0.287488                            | 0.00367740                              |                                                    |                                                                    |                        |                              |
|       |                       | 31.98                      | 0.1580                | 0.279863                            | 0.00240583                              |                                                    |                                                                    |                        |                              |
|       |                       | 32.72                      | 0.1580                | 0.273701                            | 0.00234845                              |                                                    |                                                                    |                        |                              |
|       |                       | 35.09                      | 0.2463                | 0.255739                            | 0.00339916                              |                                                    |                                                                    |                        |                              |
|       |                       | 39.28                      | 0.3026                | 0.229371                            | 0.00369977                              |                                                    |                                                                    |                        |                              |
|       |                       | 40.14                      | 0.3231                | 0.224653                            | 0.00385869                              |                                                    |                                                                    |                        |                              |
|       |                       | 41.99                      | 0.3372                | 0.215173                            | 0.00383390                              |                                                    |                                                                    |                        |                              |
|       |                       | 42.55                      | 0.2524                | 0.212470                            | 0.00282834                              |                                                    |                                                                    |                        |                              |
| 43.02 | 0.1862                | 0.210257                   | 0.00206147            |                                     |                                         |                                                    |                                                                    |                        |                              |
| 43.97 | 0.3411                | 0.205933                   | 0.00368652            |                                     |                                         |                                                    |                                                                    |                        |                              |
| 46.36 | 0.1580                | 0.195858                   | 0.00161005            |                                     |                                         |                                                    |                                                                    |                        |                              |
| 47.61 | 0.2370                | 0.191003                   | 0.00234408            |                                     |                                         |                                                    |                                                                    |                        |                              |
| 50.95 | 0.3260                | 0.179239                   | 0.00298557            |                                     |                                         |                                                    |                                                                    |                        |                              |

|   |                |       |        |          |            |          |          |     |    |
|---|----------------|-------|--------|----------|------------|----------|----------|-----|----|
|   |                | 54.21 | 0.1580 | 0.169205 | 0.00134693 |          |          |     |    |
|   |                | 56.57 | 0.2370 | 0.162694 | 0.00192175 |          |          |     |    |
|   |                | 57.52 | 0.4740 | 0.160231 | 0.00376830 |          |          |     |    |
|   |                | 62.36 | 0.2370 | 0.148908 | 0.00170886 |          |          |     |    |
|   |                | 66.54 | 0.1545 | 0.140532 | 0.00102744 |          |          |     |    |
|   |                | 66.75 | 0.3222 | 0.140141 | 0.00213413 |          |          |     |    |
|   |                | 77.45 | 0.3160 | 0.123235 | 0.00171950 |          |          |     |    |
|   |                | 10.84 | 0.1379 | 0.816188 | 0.00634172 |          |          |     |    |
|   |                | 13.99 | 0.1691 | 0.633043 | 0.00601355 |          |          |     |    |
|   |                | 16.44 | 0.1758 | 0.539213 | 0.00530998 |          |          |     |    |
|   |                | 17.86 | 0.1805 | 0.496649 | 0.00501221 |          |          |     |    |
|   |                | 19.73 | 0.2228 | 0.449979 | 0.00559032 |          |          |     |    |
|   |                | 22.32 | 0.0010 | 0.398315 | 2.2117E-05 |          |          |     |    |
|   |                | 22.52 | 0.3160 | 0.394823 | 0.00692543 |          |          |     |    |
|   |                | 24.12 | 0.1879 | 0.368983 | 0.00383741 |          |          |     |    |
|   |                | 24.34 | 0.2427 | 0.365697 | 0.00491042 |          |          |     |    |
|   |                | 24.63 | 0.1295 | 0.361457 | 0.0025883  |          |          |     |    |
|   |                | 25.67 | 0.2304 | 0.347044 | 0.00441241 |          |          |     |    |
|   |                | 28.05 | 0.2449 | 0.318115 | 0.00427788 |          |          |     |    |
|   |                | 28.42 | 0.1924 | 0.314057 | 0.00331525 |          |          |     |    |
|   |                | 28.96 | 0.4345 | 0.308323 | 0.00734133 |          |          |     |    |
|   |                | 29.54 | 0.3005 | 0.302400 | 0.00497315 |          |          |     |    |
|   |                | 30.76 | 0.2985 | 0.290679 | 0.00473498 |          |          |     |    |
|   |                | 32.58 | 0.2604 | 0.274845 | 0.00388805 |          |          |     |    |
|   |                | 33.05 | 0.1516 | 0.271043 | 0.00222955 |          |          |     |    |
|   |                | 33.38 | 0.3506 | 0.268438 | 0.00510226 |          |          |     |    |
|   |                | 33.90 | 0.4345 | 0.264439 | 0.0062205  |          |          |     |    |
|   |                | 36.11 | 0.3806 | 0.248746 | 0.00509441 |          |          |     |    |
|   |                | 37.64 | 0.0276 | 0.238979 | 0.00035335 |          |          |     |    |
| 3 | XB linker<br>3 | 37.85 | 0.3160 | 0.237701 | 0.00402145 | 0.97667  | 1.048343 | 5.7 | NA |
|   |                | 39.23 | 0.3160 | 0.229652 | 0.00386894 |          |          |     |    |
|   |                | 39.41 | 0.3160 | 0.228644 | 0.00384981 |          |          |     |    |
|   |                | 40.22 | 0.0454 | 0.224225 | 0.00054103 |          |          |     |    |
|   |                | 40.36 | 0.3322 | 0.223479 | 0.00394386 |          |          |     |    |
|   |                | 40.62 | 0.3277 | 0.222108 | 0.00386334 |          |          |     |    |
|   |                | 41.79 | 0.2013 | 0.216157 | 0.00230074 |          |          |     |    |
|   |                | 42.21 | 0.4028 | 0.214103 | 0.00455361 |          |          |     |    |
|   |                | 42.37 | 0.3898 | 0.213331 | 0.00438839 |          |          |     |    |
|   |                | 42.54 | 0.2343 | 0.212518 | 0.00262619 |          |          |     |    |
|   |                | 43.36 | 0.4098 | 0.208687 | 0.00449784 |          |          |     |    |
|   |                | 43.95 | 0.3160 | 0.206022 | 0.00341697 |          |          |     |    |
|   |                | 44.10 | 0.1367 | 0.205356 | 0.0014726  |          |          |     |    |
|   |                | 44.45 | 0.3160 | 0.203820 | 0.00337446 |          |          |     |    |
|   |                | 45.61 | 0.3160 | 0.198902 | 0.00327926 |          |          |     |    |
|   |                | 46.21 | 0.3160 | 0.196458 | 0.00323179 |          |          |     |    |
|   |                | 49.24 | 0.2538 | 0.185055 | 0.00241657 |          |          |     |    |
|   |                | 50.23 | 0.2875 | 0.181638 | 0.00267615 |          |          |     |    |
|   |                | 50.53 | 0.3695 | 0.180630 | 0.00341614 |          |          |     |    |
|   |                | 50.84 | 0.4740 | 0.179601 | 0.00435173 |          |          |     |    |
|   |                | 54.77 | 0.2370 | 0.167607 | 0.00199627 |          |          |     |    |
|   |                | 55.50 | 0.1975 | 0.165574 | 0.00163793 |          |          |     |    |
|   |                | 72.28 | 0.1975 | 0.130720 | 0.00118003 |          |          |     |    |
|   |                | 11.57 | 0.1440 | 0.764850 | 0.00620183 |          |          |     |    |
|   |                | 12.12 | 0.0010 | 0.730262 | 4.11E-0500 |          |          |     |    |
|   |                | 12.79 | 0.1533 | 0.692155 | 0.00596806 |          |          |     |    |
|   |                | 17.67 | 0.0594 | 0.501946 | 0.00166747 |          |          |     |    |
|   |                | 18.18 | 0.1619 | 0.487979 | 0.00441527 |          |          |     |    |
|   |                | 20.60 | 0.1452 | 0.431167 | 0.00348623 |          |          |     |    |
|   |                | 20.90 | 0.0847 | 0.425046 | 0.0020038  |          |          |     |    |
|   |                | 22.42 | 0.2370 | 0.396561 | 0.00521785 |          |          |     |    |
|   |                | 23.02 | 0.1516 | 0.386359 | 0.00324837 |          |          |     |    |
|   |                | 23.70 | 0.1737 | 0.375425 | 0.00361216 |          |          |     |    |
|   |                | 24.29 | 0.0981 | 0.366439 | 0.00198901 |          |          |     |    |
|   |                | 25.46 | 0.1622 | 0.349858 | 0.00313280 |          |          |     |    |
|   |                | 25.69 | 0.1459 | 0.346778 | 0.00279189 |          |          |     |    |
| 4 | XB linker<br>4 | 28.73 | 0.1564 | 0.310739 | 0.00266462 | 0.978595 | 1.044224 | 10  | NA |
|   |                | 29.40 | 0.1418 | 0.303808 | 0.00235842 |          |          |     |    |
|   |                | 30.85 | 0.1423 | 0.289851 | 0.00225033 |          |          |     |    |
|   |                | 31.09 | 0.1474 | 0.287668 | 0.00231208 |          |          |     |    |
|   |                | 34.44 | 0.0492 | 0.260415 | 0.00069265 |          |          |     |    |
|   |                | 34.72 | 0.1737 | 0.258379 | 0.00242442 |          |          |     |    |
|   |                | 35.20 | 0.4740 | 0.254965 | 0.00651984 |          |          |     |    |
|   |                | 36.62 | 0.1580 | 0.245398 | 0.00208335 |          |          |     |    |
|   |                | 36.99 | 0.1580 | 0.243028 | 0.00206101 |          |          |     |    |
|   |                | 38.69 | 0.1580 | 0.232732 | 0.00196369 |          |          |     |    |
|   |                | 38.88 | 0.1185 | 0.231638 | 0.00146499 |          |          |     |    |
|   |                | 41.15 | 0.1744 | 0.219369 | 0.00202720 |          |          |     |    |
|   |                | 41.70 | 0.0010 | 0.216602 | 1.1456E-05 |          |          |     |    |
|   |                | 41.84 | 0.1922 | 0.215910 | 0.00219386 |          |          |     |    |
|   |                | 44.09 | 0.1585 | 0.205400 | 0.00170787 |          |          |     |    |



|   |                               |       |        |          |            |          |          |      |    |
|---|-------------------------------|-------|--------|----------|------------|----------|----------|------|----|
|   |                               | 45.42 | 0.1963 | 0.199690 | 0.00204657 |          |          |      |    |
|   |                               | 46.38 | 0.1385 | 0.195778 | 0.00141066 |          |          |      |    |
|   |                               | 46.79 | 0.1739 | 0.194158 | 0.00175386 |          |          |      |    |
|   |                               | 48.31 | 0.1783 | 0.188398 | 0.00173473 |          |          |      |    |
|   |                               | 50.11 | 0.1829 | 0.182045 | 0.00170715 |          |          |      |    |
|   |                               | 52.31 | 0.1907 | 0.174895 | 0.00169438 |          |          |      |    |
|   |                               | 52.90 | 0.0884 | 0.173082 | 0.00077532 |          |          |      |    |
|   |                               | 53.05 | 0.1118 | 0.172628 | 0.00097735 |          |          |      |    |
|   |                               | 55.64 | 0.2125 | 0.165191 | 0.00175712 |          |          |      |    |
|   |                               | 58.37 | 0.1671 | 0.158098 | 0.00130539 |          |          |      |    |
|   |                               | 58.55 | 0.1059 | 0.157655 | 0.00082425 |          |          |      |    |
|   |                               | 59.24 | 0.1074 | 0.155983 | 0.00082425 |          |          |      |    |
|   |                               | 59.45 | 0.2401 | 0.155482 | 0.00183484 |          |          |      |    |
|   |                               | 59.77 | 0.3653 | 0.154726 | 0.00277360 |          |          |      |    |
|   |                               | 59.93 | 0.0660 | 0.154351 | 0.00049950 |          |          |      |    |
|   |                               | 60.72 | 0.1127 | 0.152530 | 0.00083950 |          |          |      |    |
|   |                               | 60.88 | 0.1393 | 0.152168 | 0.00103433 |          |          |      |    |
|   |                               | 65.78 | 0.1116 | 0.141970 | 0.00075299 |          |          |      |    |
|   |                               | 65.96 | 0.1131 | 0.141626 | 0.00076049 |          |          |      |    |
|   |                               | 66.42 | 0.1708 | 0.140757 | 0.00113844 |          |          |      |    |
|   |                               | 66.59 | 0.1932 | 0.140439 | 0.00128358 |          |          |      |    |
|   |                               | 68.34 | 0.3438 | 0.137263 | 0.00220983 |          |          |      |    |
|   |                               | 72.58 | 0.1548 | 0.130254 | 0.00091984 |          |          |      |    |
|   |                               | 12.15 | 0.1487 | 0.728466 | 0.00609639 |          |          |      |    |
|   |                               | 18.53 | 0.2395 | 0.478840 | 0.00640607 |          |          |      |    |
|   |                               | 18.81 | 0.1811 | 0.471775 | 0.00477061 |          |          |      |    |
|   |                               | 19.55 | 0.2495 | 0.454081 | 0.00631904 |          |          |      |    |
|   |                               | 19.96 | 0.3774 | 0.444846 | 0.00935810 |          |          |      |    |
|   |                               | 22.23 | 0.2370 | 0.399907 | 0.00526360 |          |          |      |    |
|   |                               | 22.53 | 0.2370 | 0.39465  | 0.00519171 |          |          |      |    |
|   |                               | 24.34 | 0.1930 | 0.365697 | 0.00390486 |          |          |      |    |
|   |                               | 25.62 | 0.3432 | 0.347710 | 0.00658592 |          |          |      |    |
|   |                               | 27.02 | 0.1275 | 0.330003 | 0.00231547 |          |          |      |    |
|   |                               | 27.77 | 0.3039 | 0.321259 | 0.00536420 |          |          |      |    |
|   |                               | 28.15 | 0.2765 | 0.317008 | 0.00481200 |          |          |      |    |
|   |                               | 30.54 | 0.2020 | 0.292722 | 0.00322846 |          |          |      |    |
|   |                               | 30.73 | 0.2379 | 0.290956 | 0.00377757 |          |          |      |    |
|   |                               | 31.51 | 0.3076 | 0.283929 | 0.00475734 |          |          |      |    |
|   |                               | 32.07 | 0.5677 | 0.279098 | 0.00861866 |          |          |      |    |
|   |                               | 32.28 | 0.0365 | 0.277330 | 0.00055033 |          |          |      |    |
|   |                               | 33.85 | 0.3950 | 0.264818 | 0.00566386 |          |          |      |    |
| 5 | XB linker<br>5                | 34.78 | 0.2838 | 0.257947 | 0.00395387 | 0.97545  | 1.050969 | 12.9 | NA |
|   |                               | 36.66 | 0.4422 | 0.245139 | 0.00582392 |          |          |      |    |
|   |                               | 37.34 | 0.3950 | 0.240830 | 0.00510069 |          |          |      |    |
|   |                               | 37.70 | 0.0098 | 0.238612 | 0.00012525 |          |          |      |    |
|   |                               | 37.89 | 0.3950 | 0.237460 | 0.00502110 |          |          |      |    |
|   |                               | 39.51 | 0.4468 | 0.228089 | 0.00542841 |          |          |      |    |
|   |                               | 41.83 | 0.1580 | 0.215959 | 0.00180396 |          |          |      |    |
|   |                               | 42.46 | 0.1975 | 0.212900 | 0.00221829 |          |          |      |    |
|   |                               | 45.89 | 0.2370 | 0.197754 | 0.00244272 |          |          |      |    |
|   |                               | 46.11 | 0.2370 | 0.196861 | 0.00242972 |          |          |      |    |
|   |                               | 46.81 | 0.1580 | 0.194079 | 0.00159274 |          |          |      |    |
|   |                               | 49.75 | 0.2506 | 0.183277 | 0.00235833 |          |          |      |    |
|   |                               | 50.05 | 0.3399 | 0.182249 | 0.00317688 |          |          |      |    |
|   |                               | 52.24 | 0.3308 | 0.175112 | 0.00294372 |          |          |      |    |
|   |                               | 52.42 | 0.1975 | 0.174553 | 0.00175055 |          |          |      |    |
|   |                               | 54.70 | 0.2819 | 0.167805 | 0.00237803 |          |          |      |    |
|   |                               | 56.37 | 0.3101 | 0.163223 | 0.00252505 |          |          |      |    |
|   |                               | 63.34 | 0.5322 | 0.146838 | 0.00376431 |          |          |      |    |
|   |                               | 79.03 | 0.1975 | 0.121163 | 0.00104484 |          |          |      |    |
|   |                               | 12.94 | 0.1533 | 0.684165 | 0.00589829 |          |          |      |    |
|   |                               | 19.37 | 0.1809 | 0.458260 | 0.00462503 |          |          |      |    |
|   |                               | 21.54 | 0.1701 | 0.412559 | 0.00390185 |          |          |      |    |
|   |                               | 23.20 | 0.2714 | 0.383402 | 0.00576900 |          |          |      |    |
|   |                               | 24.10 | 0.1863 | 0.369284 | 0.00380799 |          |          |      |    |
|   |                               | 25.15 | 0.1577 | 0.354100 | 0.00308469 |          |          |      |    |
|   |                               | 25.88 | 0.1678 | 0.344275 | 0.00318658 |          |          |      |    |
|   |                               | 28.84 | 0.1975 | 0.309578 | 0.00335146 |          |          |      |    |
|   |                               | 29.81 | 0.1975 | 0.299722 | 0.00323758 |          |          |      |    |
| 6 | Monomer<br>cocrystal<br>(1-6) | 31.61 | 0.1625 | 0.283054 | 0.00250486 | 0.975675 | 1.050484 | 9.4  | NA |
|   |                               | 32.47 | 0.1692 | 0.275751 | 0.00253537 |          |          |      |    |
|   |                               | 35.13 | 0.1898 | 0.255457 | 0.00261623 |          |          |      |    |
|   |                               | 35.59 | 0.2752 | 0.252260 | 0.00374113 |          |          |      |    |
|   |                               | 37.83 | 0.2316 | 0.237822 | 0.00294904 |          |          |      |    |
|   |                               | 39.17 | 0.1982 | 0.229990 | 0.00243068 |          |          |      |    |
|   |                               | 40.78 | 0.1691 | 0.221274 | 0.00198505 |          |          |      |    |
|   |                               | 43.93 | 0.2105 | 0.206111 | 0.00227732 |          |          |      |    |
|   |                               | 44.76 | 0.1794 | 0.202480 | 0.00190105 |          |          |      |    |
|   |                               | 45.98 | 0.1988 | 0.197387 | 0.00204453 |          |          |      |    |
|   |                               | 46.38 | 0.3405 | 0.195778 | 0.00346810 |          |          |      |    |

|   |                              |       |        |          |            |          |          |      |    |  |
|---|------------------------------|-------|--------|----------|------------|----------|----------|------|----|--|
|   |                              | 47.03 | 0.3643 | 0.193223 | 0.00365312 |          |          |      |    |  |
|   |                              | 52.48 | 0.2591 | 0.174368 | 0.00229351 |          |          |      |    |  |
|   |                              | 52.98 | 0.1324 | 0.172840 | 0.00115920 |          |          |      |    |  |
|   |                              | 53.15 | 0.1899 | 0.172327 | 0.00165647 |          |          |      |    |  |
|   |                              | 53.49 | 0.2241 | 0.171312 | 0.00194038 |          |          |      |    |  |
|   |                              | 58.75 | 0.3555 | 0.157166 | 0.00275568 |          |          |      |    |  |
|   |                              | 60.27 | 0.1719 | 0.153561 | 0.00129209 |          |          |      |    |  |
|   |                              | 60.42 | 0.2057 | 0.153216 | 0.00154150 |          |          |      |    |  |
|   |                              | 61.17 | 0.3555 | 0.151516 | 0.00262444 |          |          |      |    |  |
|   |                              | 67.40 | 0.2471 | 0.138947 | 0.00161666 |          |          |      |    |  |
|   |                              | 67.72 | 0.1763 | 0.138368 | 0.00114650 |          |          |      |    |  |
|   |                              | 67.91 | 0.1565 | 0.138027 | 0.00101410 |          |          |      |    |  |
|   |                              | 68.18 | 0.395  | 0.137546 | 0.00254657 |          |          |      |    |  |
|   |                              | 75.30 | 0.0941 | 0.126210 | 0.00053220 |          |          |      |    |  |
|   |                              | 75.56 | 0.1460 | 0.125840 | 0.00082187 |          |          |      |    |  |
|   |                              | 75.77 | 0.1716 | 0.125544 | 0.00096233 |          |          |      |    |  |
|   |                              | 10.65 | 0.1266 | 0.830706 | 0.00592654 |          |          |      |    |  |
|   |                              | 15.63 | 0.1379 | 0.566970 | 0.00438400 |          |          |      |    |  |
|   |                              | 20.58 | 0.0010 | 0.431582 | 2.4034E-05 |          |          |      |    |  |
|   |                              | 21.23 | 0.1259 | 0.418513 | 0.00293114 |          |          |      |    |  |
|   |                              | 21.79 | 0.0010 | 0.407882 | 2.2669E-05 |          |          |      |    |  |
|   |                              | 22.37 | 0.0913 | 0.397436 | 0.00201469 |          |          |      |    |  |
|   |                              | 28.98 | 0.4175 | 0.308115 | 0.00704902 |          |          |      |    |  |
|   |                              | 30.10 | 0.1877 | 0.296900 | 0.00304590 |          |          |      |    |  |
| 7 | Monomer<br>cocystal<br>(2-6) | 31.97 | 0.1433 | 0.279948 | 0.00218271 | 0.980435 | 1.040309 | 10.6 | NA |  |
|   |                              | 35.08 | 0.1550 | 0.255809 | 0.00213979 |          |          |      |    |  |
|   |                              | 37.51 | 0.1478 | 0.239777 | 0.00189927 |          |          |      |    |  |
|   |                              | 40.20 | 0.1288 | 0.224332 | 0.00153573 |          |          |      |    |  |
|   |                              | 43.01 | 0.1652 | 0.210304 | 0.00182944 |          |          |      |    |  |
|   |                              | 56.58 | 0.1370 | 0.162667 | 0.00111065 |          |          |      |    |  |
|   |                              | 56.73 | 0.1308 | 0.162273 | 0.00105707 |          |          |      |    |  |
|   |                              | 62.38 | 0.2212 | 0.148865 | 0.00159431 |          |          |      |    |  |
|   |                              | 66.59 | 0.1213 | 0.140439 | 0.00080589 |          |          |      |    |  |
|   |                              | 66.78 | 0.1265 | 0.140085 | 0.00083741 |          |          |      |    |  |
|   |                              | 10.21 | 0.2307 | 0.866404 | 0.01126784 |          |          |      |    |  |
|   |                              | 10.89 | 0.2003 | 0.812452 | 0.00916881 |          |          |      |    |  |
|   |                              | 11.17 | 0.0790 | 0.792148 | 0.00352505 |          |          |      |    |  |
|   |                              | 11.56 | 0.0647 | 0.765509 | 0.00278894 |          |          |      |    |  |
|   |                              | 11.80 | 0.1096 | 0.749993 | 0.00462764 |          |          |      |    |  |
|   |                              | 12.08 | 0.1037 | 0.732671 | 0.00427631 |          |          |      |    |  |
|   |                              | 12.51 | 0.1304 | 0.707583 | 0.00519111 |          |          |      |    |  |
|   |                              | 14.74 | 0.1111 | 0.600997 | 0.00374785 |          |          |      |    |  |
|   |                              | 15.02 | 0.0790 | 0.589856 | 0.00261475 |          |          |      |    |  |
|   |                              | 15.43 | 0.0790 | 0.574273 | 0.00254446 |          |          |      |    |  |
|   |                              | 15.59 | 0.0790 | 0.568416 | 0.00251802 |          |          |      |    |  |
|   |                              | 15.83 | 0.1185 | 0.559851 | 0.00371905 |          |          |      |    |  |
|   |                              | 16.03 | 0.0395 | 0.552911 | 0.00122402 |          |          |      |    |  |
|   |                              | 16.50 | 0.1185 | 0.537266 | 0.00356606 |          |          |      |    |  |
|   |                              | 17.05 | 0.0790 | 0.520057 | 0.00229959 |          |          |      |    |  |
|   |                              | 17.37 | 0.0790 | 0.510547 | 0.00225659 |          |          |      |    |  |
|   |                              | 17.59 | 0.1580 | 0.504211 | 0.00445586 |          |          |      |    |  |
|   |                              | 17.72 | 0.3950 | 0.500541 | 0.01105662 |          |          |      |    |  |
|   |                              | 17.98 | 0.2370 | 0.493362 | 0.00653648 |          |          |      |    |  |
|   |                              | 18.16 | 0.1185 | 0.488512 | 0.00323531 |          |          |      |    |  |
|   |                              | 18.49 | 0.0395 | 0.479867 | 0.00105886 |          |          |      |    |  |
|   |                              | 18.82 | 0.1185 | 0.471526 | 0.00311989 |          |          |      |    |  |
|   |                              | 19.04 | 0.0395 | 0.466127 | 0.00102773 |          |          |      |    |  |
| 8 | Monomer<br>cocystal<br>(3-6) | 19.76 | 0.1975 | 0.449303 | 0.00494784 | 0.978614 | 1.044185 | 6.5  | NA |  |
|   |                              | 20.55 | 0.1185 | 0.432205 | 0.00285224 |          |          |      |    |  |
|   |                              | 20.80 | 0.1975 | 0.427067 | 0.00469534 |          |          |      |    |  |
|   |                              | 21.00 | 0.1185 | 0.423044 | 0.00278977 |          |          |      |    |  |
|   |                              | 21.50 | 0.1975 | 0.413318 | 0.00453900 |          |          |      |    |  |
|   |                              | 22.48 | 0.4740 | 0.395516 | 0.01040711 |          |          |      |    |  |
|   |                              | 23.49 | 0.1185 | 0.378734 | 0.00248692 |          |          |      |    |  |
|   |                              | 23.65 | 0.0395 | 0.376208 | 0.00082320 |          |          |      |    |  |
|   |                              | 25.75 | 0.0790 | 0.345984 | 0.00150807 |          |          |      |    |  |
|   |                              | 26.91 | 0.0395 | 0.331327 | 0.00072039 |          |          |      |    |  |
|   |                              | 28.12 | 0.2765 | 0.317339 | 0.00481735 |          |          |      |    |  |
|   |                              | 28.52 | 0.0790 | 0.312979 | 0.00135628 |          |          |      |    |  |
|   |                              | 29.04 | 0.0395 | 0.307492 | 0.00066547 |          |          |      |    |  |
|   |                              | 29.35 | 0.1185 | 0.304314 | 0.00197440 |          |          |      |    |  |
|   |                              | 29.63 | 0.1185 | 0.301502 | 0.00195490 |          |          |      |    |  |
|   |                              | 31.98 | 0.0790 | 0.279863 | 0.00120291 |          |          |      |    |  |
|   |                              | 32.61 | 0.1580 | 0.274599 | 0.00235682 |          |          |      |    |  |
|   |                              | 33.13 | 0.0395 | 0.270407 | 0.00057943 |          |          |      |    |  |
|   |                              | 33.57 | 0.0395 | 0.266962 | 0.00057140 |          |          |      |    |  |
|   |                              | 33.80 | 0.0395 | 0.265198 | 0.00056727 |          |          |      |    |  |
|   |                              | 33.96 | 0.0395 | 0.263985 | 0.00056444 |          |          |      |    |  |
|   |                              | 34.14 | 0.1185 | 0.262635 | 0.00168385 |          |          |      |    |  |
|   |                              | 34.77 | 0.0395 | 0.258019 | 0.00055048 |          |          |      |    |  |

|   |                               |       |        |          |            |          |          |     |    |
|---|-------------------------------|-------|--------|----------|------------|----------|----------|-----|----|
|   |                               | 34.95 | 0.0395 | 0.256731 | 0.00054746 |          |          |     |    |
|   |                               | 35.10 | 0.0790 | 0.255668 | 0.00108994 |          |          |     |    |
|   |                               | 36.25 | 0.1975 | 0.247817 | 0.00263266 |          |          |     |    |
|   |                               | 36.94 | 0.0790 | 0.243345 | 0.00103200 |          |          |     |    |
|   |                               | 39.05 | 0.0790 | 0.230669 | 0.00097206 |          |          |     |    |
|   |                               | 39.75 | 0.1821 | 0.226767 | 0.00219795 |          |          |     |    |
|   |                               | 40.35 | 0.1502 | 0.223532 | 0.00178365 |          |          |     |    |
|   |                               | 41.89 | 0.1356 | 0.215664 | 0.00154578 |          |          |     |    |
|   |                               | 42.24 | 0.0637 | 0.213958 | 0.00071956 |          |          |     |    |
|   |                               | 42.43 | 0.2148 | 0.213043 | 0.00241448 |          |          |     |    |
|   |                               | 42.93 | 0.0883 | 0.210677 | 0.00097985 |          |          |     |    |
|   |                               | 43.32 | 0.1580 | 0.208871 | 0.00173593 |          |          |     |    |
|   |                               | 43.61 | 0.0395 | 0.207549 | 0.00043080 |          |          |     |    |
|   |                               | 44.08 | 0.0790 | 0.205444 | 0.00085146 |          |          |     |    |
|   |                               | 44.40 | 0.0790 | 0.204038 | 0.00084467 |          |          |     |    |
|   |                               | 44.58 | 0.0395 | 0.203255 | 0.00042044 |          |          |     |    |
|   |                               | 44.74 | 0.0790 | 0.202566 | 0.00083756 |          |          |     |    |
|   |                               | 45.80 | 0.1185 | 0.198121 | 0.00122404 |          |          |     |    |
|   |                               | 45.91 | 0.1185 | 0.197672 | 0.00122077 |          |          |     |    |
|   |                               | 46.88 | 0.0395 | 0.193806 | 0.00039752 |          |          |     |    |
|   |                               | 47.98 | 0.0395 | 0.189616 | 0.00038729 |          |          |     |    |
|   |                               | 48.57 | 0.0395 | 0.187450 | 0.00038198 |          |          |     |    |
|   |                               | 50.36 | 0.0395 | 0.181199 | 0.00036660 |          |          |     |    |
|   |                               | 50.76 | 0.0790 | 0.179865 | 0.00072660 |          |          |     |    |
|   |                               | 52.89 | 0.0395 | 0.173113 | 0.00034652 |          |          |     |    |
|   |                               | 54.06 | 0.0395 | 0.169639 | 0.00033782 |          |          |     |    |
|   |                               | 54.91 | 0.0395 | 0.167213 | 0.00033172 |          |          |     |    |
|   |                               | 56.44 | 0.0790 | 0.163038 | 0.00064233 |          |          |     |    |
|   |                               | 56.60 | 0.0395 | 0.162615 | 0.00032009 |          |          |     |    |
|   |                               | 56.89 | 0.0395 | 0.161854 | 0.00031816 |          |          |     |    |
|   |                               | 57.43 | 0.0790 | 0.160460 | 0.00062922 |          |          |     |    |
|   |                               | 57.71 | 0.1185 | 0.159748 | 0.00093838 |          |          |     |    |
|   |                               | 60.43 | 0.1483 | 0.153193 | 0.00111113 |          |          |     |    |
|   |                               | 60.61 | 0.1771 | 0.152781 | 0.00132213 |          |          |     |    |
|   |                               | 60.93 | 0.0194 | 0.152055 | 0.00014391 |          |          |     |    |
|   |                               | 61.13 | 0.1176 | 0.151605 | 0.00086886 |          |          |     |    |
|   |                               | 62.41 | 0.0395 | 0.148800 | 0.00028453 |          |          |     |    |
|   |                               | 66.55 | 0.0790 | 0.140513 | 0.00052526 |          |          |     |    |
|   |                               | 66.88 | 0.0790 | 0.139900 | 0.00052198 |          |          |     |    |
|   |                               | 68.31 | 0.0794 | 0.137316 | 0.00051064 |          |          |     |    |
|   |                               | 73.52 | 0.0790 | 0.128819 | 0.00046144 |          |          |     |    |
|   |                               | 75.43 | 0.1289 | 0.126025 | 0.00072731 |          |          |     |    |
|   |                               | 75.65 | 0.1634 | 0.125713 | 0.00091832 |          |          |     |    |
|   |                               | 76.78 | 0.1484 | 0.124142 | 0.00081726 |          |          |     |    |
|   |                               | 77.04 | 0.2198 | 0.123788 | 0.00120484 |          |          |     |    |
|   |                               | 77.54 | 0.1619 | 0.123114 | 0.00087955 |          |          |     |    |
|   |                               | 78.08 | 0.0790 | 0.122398 | 0.00042507 |          |          |     |    |
|   |                               | 79.14 | 0.0395 | 0.121022 | 0.00020856 |          |          |     |    |
|   |                               | 11.64 | 0.1194 | 0.760266 | 0.00511121 |          |          |     |    |
|   |                               | 11.84 | 0.0010 | 0.747468 | 4.2079E-05 |          |          |     |    |
|   |                               | 12.13 | 0.1580 | 0.729663 | 0.00648843 |          |          |     |    |
|   |                               | 12.89 | 0.0790 | 0.686807 | 0.00305146 |          |          |     |    |
|   |                               | 16.31 | 0.1975 | 0.543482 | 0.00601363 |          |          |     |    |
|   |                               | 18.26 | 0.1307 | 0.485859 | 0.00354852 |          |          |     |    |
|   |                               | 20.71 | 0.1754 | 0.428902 | 0.00418846 |          |          |     |    |
|   |                               | 22.39 | 0.1406 | 0.397086 | 0.00309974 |          |          |     |    |
|   |                               | 22.92 | 0.0864 | 0.388022 | 0.00185961 |          |          |     |    |
|   |                               | 23.11 | 0.1296 | 0.384875 | 0.00276586 |          |          |     |    |
|   |                               | 23.81 | 0.1474 | 0.373716 | 0.00305066 |          |          |     |    |
|   |                               | 24.42 | 0.1255 | 0.364517 | 0.00253060 |          |          |     |    |
|   |                               | 25.70 | 0.2720 | 0.346645 | 0.00520280 |          |          |     |    |
|   |                               | 28.89 | 0.1327 | 0.309054 | 0.00224778 |          |          |     |    |
|   |                               | 29.50 | 0.1334 | 0.302801 | 0.00221085 |          |          |     |    |
|   |                               | 30.92 | 0.1496 | 0.289211 | 0.00236015 |          |          |     |    |
| 9 | Monomer<br>cocrystal<br>(4-6) | 31.15 | 0.1492 | 0.287128 | 0.00233558 | 0.977574 | 1.046407 | 8.6 | NA |
|   |                               | 34.54 | 0.1269 | 0.259684 | 0.00178103 |          |          |     |    |
|   |                               | 34.82 | 0.1602 | 0.257660 | 0.00222916 |          |          |     |    |
|   |                               | 35.30 | 0.1459 | 0.254265 | 0.00200079 |          |          |     |    |
|   |                               | 36.71 | 0.1557 | 0.244817 | 0.00204763 |          |          |     |    |
|   |                               | 37.14 | 0.1400 | 0.242081 | 0.00181830 |          |          |     |    |
|   |                               | 38.94 | 0.2998 | 0.231295 | 0.00370019 |          |          |     |    |
|   |                               | 41.22 | 0.1928 | 0.219013 | 0.00223692 |          |          |     |    |
|   |                               | 41.83 | 0.1998 | 0.215959 | 0.00228121 |          |          |     |    |
|   |                               | 42.13 | 0.3110 | 0.214491 | 0.00352314 |          |          |     |    |
|   |                               | 42.50 | 0.2765 | 0.212709 | 0.00310240 |          |          |     |    |
|   |                               | 45.59 | 0.1346 | 0.198985 | 0.00139748 |          |          |     |    |
|   |                               | 46.44 | 0.2345 | 0.195539 | 0.00238500 |          |          |     |    |
|   |                               | 46.89 | 0.4121 | 0.193767 | 0.00414629 |          |          |     |    |
|   |                               | 48.40 | 0.2012 | 0.188069 | 0.00195342 |          |          |     |    |
|   |                               | 49.71 | 0.1545 | 0.183415 | 0.00145529 |          |          |     |    |

|    |                               |       |        |          |            |          |          |      |                |
|----|-------------------------------|-------|--------|----------|------------|----------|----------|------|----------------|
|    |                               | 50.23 | 0.2333 | 0.181638 | 0.00217164 |          |          |      |                |
|    |                               | 52.43 | 0.1580 | 0.174523 | 0.00140013 |          |          |      |                |
|    |                               | 53.00 | 0.0790 | 0.172779 | 0.00069137 |          |          |      |                |
|    |                               | 55.77 | 0.1462 | 0.164836 | 0.00120558 |          |          |      |                |
|    |                               | 59.04 | 0.1277 | 0.156463 | 0.00098404 |          |          |      |                |
|    |                               | 59.20 | 0.0884 | 0.156078 | 0.00067899 |          |          |      |                |
|    |                               | 59.56 | 0.1486 | 0.155221 | 0.00113307 |          |          |      |                |
|    |                               | 59.75 | 0.1360 | 0.154773 | 0.00103302 |          |          |      |                |
|    |                               | 60.84 | 0.1147 | 0.152258 | 0.00085235 |          |          |      |                |
|    |                               | 60.97 | 0.1973 | 0.151965 | 0.00146237 |          |          |      |                |
|    |                               | 65.88 | 0.0790 | 0.141779 | 0.00053201 |          |          |      |                |
|    |                               | 66.06 | 0.0790 | 0.141436 | 0.00053019 |          |          |      |                |
|    |                               | 66.48 | 0.1580 | 0.140644 | 0.00105192 |          |          |      |                |
|    |                               | 66.66 | 0.1975 | 0.140308 | 0.00131040 |          |          |      |                |
|    |                               | 72.38 | 0.0656 | 0.130564 | 0.00039123 |          |          |      |                |
|    |                               | 72.64 | 0.1355 | 0.130161 | 0.00080427 |          |          |      |                |
|    |                               | 12.10 | 0.1333 | 0.731465 | 0.00548778 |          |          |      |                |
|    |                               | 17.60 | 0.3235 | 0.503927 | 0.00911796 |          |          |      |                |
|    |                               | 18.51 | 0.2575 | 0.479353 | 0.00689510 |          |          |      |                |
|    |                               | 18.79 | 0.182  | 0.472272 | 0.00479952 |          |          |      |                |
|    |                               | 19.48 | 0.2489 | 0.455697 | 0.00632694 |          |          |      |                |
|    |                               | 19.92 | 0.3552 | 0.445730 | 0.00882568 |          |          |      |                |
|    |                               | 22.05 | 0.5802 | 0.403131 | 0.01299368 |          |          |      |                |
|    |                               | 22.40 | 0.4581 | 0.396911 | 0.01009487 |          |          |      |                |
|    |                               | 22.96 | 0.2365 | 0.387355 | 0.00508116 |          |          |      |                |
|    |                               | 24.30 | 0.1814 | 0.366290 | 0.00367639 |          |          |      |                |
|    |                               | 25.68 | 0.1239 | 0.346911 | 0.00237186 |          |          |      |                |
|    |                               | 26.49 | 0.3000 | 0.336484 | 0.00556129 |          |          |      |                |
|    |                               | 27.03 | 0.1161 | 0.329883 | 0.00210763 |          |          |      |                |
|    |                               | 27.79 | 0.2919 | 0.321032 | 0.00514852 |          |          |      |                |
|    |                               | 28.25 | 0.5193 | 0.315908 | 0.00900419 |          |          |      |                |
|    |                               | 28.58 | 0.2728 | 0.312335 | 0.00467320 |          |          |      |                |
|    |                               | 28.74 | 0.4579 | 0.310633 | 0.00779851 |          |          |      |                |
|    |                               | 30.50 | 0.1850 | 0.293097 | 0.00296083 |          |          |      |                |
|    |                               | 30.70 | 0.2185 | 0.291233 | 0.00347308 |          |          |      |                |
|    |                               | 31.46 | 0.2867 | 0.284369 | 0.00444152 |          |          |      |                |
|    |                               | 31.98 | 0.5739 | 0.279863 | 0.00873863 |          |          |      |                |
|    |                               | 33.85 | 0.4710 | 0.264818 | 0.00675362 |          |          |      |                |
|    |                               | 34.31 | 0.0870 | 0.261372 | 0.00122974 |          |          |      |                |
| 10 | Monomer<br>cocrystal<br>(5-6) | 34.67 | 0.4375 | 0.258740 | 0.00611578 | 0.974161 | 1.05375  | 9.0  | NA             |
|    |                               | 36.52 | 0.2370 | 0.246047 | 0.00313419 |          |          |      |                |
|    |                               | 37.25 | 0.2370 | 0.241391 | 0.00306836 |          |          |      |                |
|    |                               | 37.61 | 0.2370 | 0.239163 | 0.00303680 |          |          |      |                |
|    |                               | 37.79 | 0.2370 | 0.238065 | 0.00302124 |          |          |      |                |
|    |                               | 38.02 | 0.2961 | 0.236677 | 0.00375006 |          |          |      |                |
|    |                               | 39.43 | 0.2370 | 0.228533 | 0.00288577 |          |          |      |                |
|    |                               | 39.81 | 0.2370 | 0.226439 | 0.00285591 |          |          |      |                |
|    |                               | 40.20 | 0.2892 | 0.224332 | 0.00344823 |          |          |      |                |
|    |                               | 41.82 | 0.2370 | 0.216009 | 0.00270664 |          |          |      |                |
|    |                               | 43.25 | 0.4384 | 0.209192 | 0.00482523 |          |          |      |                |
|    |                               | 45.59 | 0.2370 | 0.198985 | 0.00246065 |          |          |      |                |
|    |                               | 45.96 | 0.2370 | 0.197469 | 0.00243857 |          |          |      |                |
|    |                               | 46.36 | 0.2370 | 0.195858 | 0.00241508 |          |          |      |                |
|    |                               | 46.70 | 0.2370 | 0.194511 | 0.00239541 |          |          |      |                |
|    |                               | 49.74 | 0.1807 | 0.183312 | 0.00170091 |          |          |      |                |
|    |                               | 49.93 | 0.5181 | 0.182659 | 0.00485570 |          |          |      |                |
|    |                               | 56.34 | 0.2786 | 0.163303 | 0.00226998 |          |          |      |                |
|    |                               | 63.37 | 0.2187 | 0.146776 | 0.00154598 |          |          |      |                |
|    |                               | 63.54 | 0.3386 | 0.146424 | 0.00238562 |          |          |      |                |
|    |                               | 63.76 | 0.0647 | 0.145972 | 0.00045390 |          |          |      |                |
|    |                               | 63.89 | 0.3923 | 0.145706 | 0.00274520 |          |          |      |                |
|    |                               | 74.18 | 0.1185 | 0.127836 | 0.00068392 |          |          |      |                |
|    |                               | 78.16 | 0.1975 | 0.122292 | 0.00106115 |          |          |      |                |
|    |                               | 12.09 | 0.1588 | 0.732068 | 0.00654302 |          |          |      |                |
|    |                               | 17.63 | 0.1805 | 0.503076 | 0.00507866 |          |          |      |                |
|    |                               | 17.82 | 0.0763 | 0.497755 | 0.00212357 |          |          |      |                |
|    |                               | 18.43 | 0.3036 | 0.481416 | 0.00816543 |          |          |      |                |
|    |                               | 18.75 | 0.2268 | 0.473271 | 0.00599393 |          |          |      |                |
|    |                               | 19.49 | 0.2730 | 0.455466 | 0.00693593 |          |          |      |                |
|    |                               | 19.88 | 0.3938 | 0.446618 | 0.00980486 |          |          |      |                |
|    |                               | 21.79 | 0.4740 | 0.407882 | 0.01074514 |          |          |      |                |
| 11 | Polymer<br>P(5-6)             | 21.99 | 0.0719 | 0.404217 | 0.00161472 | 0.976107 | 1.049554 | 10.1 | 55%<br>(31/56) |
|    |                               | 22.25 | 0.5394 | 0.399552 | 0.01196863 |          |          |      |                |
|    |                               | 22.75 | 0.2302 | 0.390883 | 0.00499269 |          |          |      |                |
|    |                               | 24.29 | 0.1935 | 0.366439 | 0.00392329 |          |          |      |                |
|    |                               | 26.45 | 0.3139 | 0.336984 | 0.00582808 |          |          |      |                |
|    |                               | 27.76 | 0.4007 | 0.321372 | 0.00707548 |          |          |      |                |
|    |                               | 28.21 | 0.2634 | 0.316347 | 0.00457386 |          |          |      |                |
|    |                               | 30.48 | 0.2159 | 0.293285 | 0.00345775 |          |          |      |                |
|    |                               | 30.66 | 0.2240 | 0.291604 | 0.00356538 |          |          |      |                |

|    |                                   |       |        |          |            |          |          |     |    |
|----|-----------------------------------|-------|--------|----------|------------|----------|----------|-----|----|
|    |                                   | 31.43 | 0.3214 | 0.284634 | 0.00498409 |          |          |     |    |
|    |                                   | 31.94 | 0.4756 | 0.280204 | 0.00725140 |          |          |     |    |
|    |                                   | 33.55 | 0.2237 | 0.267117 | 0.00323802 |          |          |     |    |
|    |                                   | 33.91 | 0.2498 | 0.264363 | 0.00357513 |          |          |     |    |
|    |                                   | 34.22 | 0.3243 | 0.262039 | 0.00459676 |          |          |     |    |
|    |                                   | 34.37 | 0.2405 | 0.260930 | 0.00339314 |          |          |     |    |
|    |                                   | 34.53 | 0.2502 | 0.259757 | 0.00351261 |          |          |     |    |
|    |                                   | 34.66 | 0.4389 | 0.258812 | 0.00613724 |          |          |     |    |
|    |                                   | 36.48 | 0.5925 | 0.246307 | 0.00784468 |          |          |     |    |
|    |                                   | 37.20 | 0.2993 | 0.241704 | 0.00388053 |          |          |     |    |
|    |                                   | 37.36 | 0.0012 | 0.240705 | 1.5487E-05 |          |          |     |    |
|    |                                   | 37.56 | 0.1975 | 0.239470 | 0.00253429 |          |          |     |    |
|    |                                   | 37.78 | 0.0033 | 0.238126 | 4.208E-050 |          |          |     |    |
|    |                                   | 40.60 | 0.1185 | 0.222213 | 0.00139778 |          |          |     |    |
|    |                                   | 45.74 | 0.1975 | 0.198367 | 0.00204305 |          |          |     |    |
|    |                                   | 46.33 | 0.2370 | 0.195977 | 0.00241683 |          |          |     |    |
|    |                                   | 48.31 | 0.1185 | 0.188398 | 0.00115292 |          |          |     |    |
|    |                                   | 49.67 | 0.2370 | 0.183554 | 0.00223443 |          |          |     |    |
|    |                                   | 50.07 | 0.2370 | 0.182181 | 0.00221412 |          |          |     |    |
|    |                                   | 52.11 | 0.2370 | 0.175519 | 0.00211508 |          |          |     |    |
|    |                                   | 56.30 | 0.3173 | 0.163410 | 0.00258747 |          |          |     |    |
|    |                                   | 63.25 | 0.3160 | 0.147025 | 0.00223903 |          |          |     |    |
|    |                                   | 69.01 | 0.5490 | 0.136093 | 0.00348477 |          |          |     |    |
|    |                                   | 13.02 | 0.1852 | 0.679979 | 0.00708150 |          |          |     |    |
|    |                                   | 19.45 | 0.1226 | 0.456393 | 0.00312135 |          |          |     |    |
|    |                                   | 20.17 | 0.1876 | 0.440261 | 0.00460234 |          |          |     |    |
|    |                                   | 21.47 | 0.3305 | 0.413889 | 0.00760651 |          |          |     |    |
|    |                                   | 23.35 | 0.1708 | 0.380973 | 0.00360663 |          |          |     |    |
|    |                                   | 24.15 | 0.1486 | 0.368531 | 0.00303092 |          |          |     |    |
|    |                                   | 25.15 | 0.2091 | 0.354100 | 0.00409009 |          |          |     |    |
|    |                                   | 25.96 | 0.1438 | 0.343232 | 0.00272210 |          |          |     |    |
|    |                                   | 26.41 | 0.0012 | 0.337485 | 2.2315E-05 |          |          |     |    |
|    |                                   | 28.92 | 0.3042 | 0.308740 | 0.00514720 |          |          |     |    |
|    |                                   | 29.86 | 0.1766 | 0.299232 | 0.00288990 |          |          |     |    |
|    |                                   | 31.70 | 0.1919 | 0.282271 | 0.00294921 |          |          |     |    |
|    |                                   | 32.56 | 0.1597 | 0.275009 | 0.00238604 |          |          |     |    |
|    |                                   | 33.08 | 0.0012 | 0.270804 | 1.7631E-05 |          |          |     |    |
|    |                                   | 35.17 | 0.1862 | 0.255175 | 0.00256350 |          |          |     |    |
|    |                                   | 37.85 | 0.3555 | 0.237701 | 0.00452413 |          |          |     |    |
|    |                                   | 38.52 | 0.2765 | 0.233720 | 0.00345283 |          |          |     |    |
| 12 | Monomer<br>cocrystal solid<br>1·7 | 39.24 | 0.1975 | 0.229596 | 0.00241742 | 0.977876 | 1.04576  | 9.4 | NA |
|    |                                   | 40.31 | 0.2370 | 0.223745 | 0.00281745 |          |          |     |    |
|    |                                   | 40.84 | 0.1185 | 0.220963 | 0.00138883 |          |          |     |    |
|    |                                   | 43.93 | 0.1503 | 0.206111 | 0.00162604 |          |          |     |    |
|    |                                   | 44.42 | 0.1398 | 0.203950 | 0.00149400 |          |          |     |    |
|    |                                   | 46.06 | 0.1861 | 0.197063 | 0.00191020 |          |          |     |    |
|    |                                   | 46.44 | 0.3035 | 0.195539 | 0.00308677 |          |          |     |    |
|    |                                   | 47.09 | 0.1415 | 0.192990 | 0.00141690 |          |          |     |    |
|    |                                   | 50.31 | 0.3090 | 0.181368 | 0.00287106 |          |          |     |    |
|    |                                   | 52.57 | 0.1648 | 0.174091 | 0.00145590 |          |          |     |    |
|    |                                   | 53.08 | 0.1842 | 0.172538 | 0.00160921 |          |          |     |    |
|    |                                   | 53.56 | 0.2211 | 0.171104 | 0.00191150 |          |          |     |    |
|    |                                   | 60.35 | 0.1580 | 0.153377 | 0.00118571 |          |          |     |    |
|    |                                   | 60.52 | 0.1462 | 0.152987 | 0.00109342 |          |          |     |    |
|    |                                   | 67.46 | 0.1834 | 0.138838 | 0.00119854 |          |          |     |    |
|    |                                   | 67.80 | 0.1762 | 0.138224 | 0.00114412 |          |          |     |    |
|    |                                   | 67.99 | 0.1692 | 0.137884 | 0.00109474 |          |          |     |    |
|    |                                   | 75.63 | 0.1493 | 0.125741 | 0.00083938 |          |          |     |    |
|    |                                   | 75.84 | 0.1663 | 0.125445 | 0.00093143 |          |          |     |    |
|    |                                   | 10.81 | 0.1345 | 0.818446 | 0.00620263 |          |          |     |    |
|    |                                   | 14.97 | 0.1315 | 0.591815 | 0.00436710 |          |          |     |    |
|    |                                   | 15.69 | 0.1419 | 0.564815 | 0.00449369 |          |          |     |    |
|    |                                   | 18.25 | 0.1580 | 0.486123 | 0.00429211 |          |          |     |    |
|    |                                   | 21.58 | 0.1044 | 0.411804 | 0.00239024 |          |          |     |    |
|    |                                   | 22.37 | 0.1490 | 0.397436 | 0.00328794 |          |          |     |    |
|    |                                   | 23.77 | 0.2139 | 0.374336 | 0.00443465 |          |          |     |    |
|    |                                   | 26.67 | 0.1506 | 0.334254 | 0.00277223 |          |          |     |    |
|    |                                   | 27.54 | 0.1818 | 0.323889 | 0.00323686 |          |          |     |    |
|    |                                   | 28.82 | 0.1770 | 0.309789 | 0.00300576 |          |          |     |    |
| 13 | Monomer<br>cocrystal<br>(2·7)     | 29.65 | 0.0894 | 0.301303 | 0.00147379 | 0.977219 | 1.047167 | 6.9 | NA |
|    |                                   | 30.06 | 0.1929 | 0.297286 | 0.00313465 |          |          |     |    |
|    |                                   | 31.56 | 0.1654 | 0.283491 | 0.00255381 |          |          |     |    |
|    |                                   | 32.52 | 0.1006 | 0.275338 | 0.00150499 |          |          |     |    |
|    |                                   | 34.87 | 0.1722 | 0.257302 | 0.00239248 |          |          |     |    |
|    |                                   | 35.27 | 0.1620 | 0.254475 | 0.00222359 |          |          |     |    |
|    |                                   | 36.26 | 0.1145 | 0.247751 | 0.00152582 |          |          |     |    |
|    |                                   | 37.48 | 0.2040 | 0.239962 | 0.00262371 |          |          |     |    |
|    |                                   | 39.8  | 0.1832 | 0.226493 | 0.00220821 |          |          |     |    |
|    |                                   | 41.22 | 0.2568 | 0.219013 | 0.00297947 |          |          |     |    |
|    |                                   | 43.74 | 0.2118 | 0.206962 | 0.00230238 |          |          |     |    |

|    |                               |       |        |          |             |          |          |     |                 |
|----|-------------------------------|-------|--------|----------|-------------|----------|----------|-----|-----------------|
|    |                               | 44.51 | 0.2501 | 0.203559 | 0.00266675  |          |          |     |                 |
|    |                               | 45.57 | 0.2736 | 0.199067 | 0.00284203  |          |          |     |                 |
|    |                               | 46.82 | 0.2584 | 0.194040 | 0.00260421  |          |          |     |                 |
|    |                               | 48.06 | 0.2782 | 0.189319 | 0.00272257  |          |          |     |                 |
|    |                               | 50.20 | 0.4278 | 0.181739 | 0.00398483  |          |          |     |                 |
|    |                               | 50.86 | 0.2083 | 0.179535 | 0.00191151  |          |          |     |                 |
|    |                               | 51.02 | 0.4177 | 0.179009 | 0.00381936  |          |          |     |                 |
|    |                               | 52.29 | 0.2691 | 0.174957 | 0.00239202  |          |          |     |                 |
|    |                               | 55.49 | 0.0934 | 0.165602 | 0.00077476  |          |          |     |                 |
|    |                               | 55.65 | 0.1026 | 0.165163 | 0.00084820  |          |          |     |                 |
|    |                               | 56.06 | 0.2709 | 0.164052 | 0.00222026  |          |          |     |                 |
|    |                               | 56.94 | 0.1580 | 0.161724 | 0.00127131  |          |          |     |                 |
|    |                               | 59.80 | 0.3910 | 0.154655 | 0.00296693  |          |          |     |                 |
|    |                               | 61.43 | 0.3812 | 0.150937 | 0.00279964  |          |          |     |                 |
|    |                               | 62.34 | 0.4730 | 0.148951 | 0.00341185  |          |          |     |                 |
|    |                               | 65.74 | 0.3927 | 0.142047 | 0.00265168  |          |          |     |                 |
|    |                               | 65.96 | 0.1064 | 0.141626 | 0.00071544  |          |          |     |                 |
|    |                               | 10.71 | 0.2780 | 0.826066 | 0.01294071  |          |          |     |                 |
|    |                               | 14.93 | 0.1495 | 0.593391 | 0.00497834  |          |          |     |                 |
|    |                               | 15.66 | 0.1519 | 0.565890 | 0.00481971  |          |          |     |                 |
|    |                               | 20.79 | 0.1049 | 0.427270 | 0.00249511  |          |          |     |                 |
|    |                               | 22.38 | 0.1899 | 0.397261 | 0.00418855  |          |          |     |                 |
|    |                               | 23.76 | 0.2418 | 0.374491 | 0.00501525  |          |          |     |                 |
|    |                               | 24.49 | 0.0900 | 0.363491 | 0.00180942  |          |          |     |                 |
|    |                               | 24.62 | 0.0955 | 0.361601 | 0.00190955  |          |          |     |                 |
|    |                               | 24.92 | 0.4076 | 0.357316 | 0.00804884  |          |          |     |                 |
|    |                               | 26.68 | 0.1638 | 0.334131 | 0.00301405  |          |          |     |                 |
|    |                               | 27.53 | 0.1956 | 0.324005 | 0.00348388  |          |          |     |                 |
|    |                               | 28.80 | 0.2150 | 0.309999 | 0.00365371  |          |          |     |                 |
|    |                               | 29.31 | 0.0010 | 0.304720 | 1.6685E-050 |          |          |     |                 |
|    |                               | 29.69 | 0.3085 | 0.300906 | 0.00507857  |          |          |     |                 |
|    |                               | 30.04 | 0.2101 | 0.297480 | 0.00341653  |          |          |     |                 |
|    |                               | 31.47 | 0.2568 | 0.284281 | 0.00397698  |          |          |     |                 |
|    |                               | 33.33 | 0.1843 | 0.268830 | 0.00268637  |          |          |     |                 |
|    |                               | 35.33 | 0.1466 | 0.254056 | 0.00200856  |          |          |     |                 |
|    |                               | 36.21 | 0.2312 | 0.248082 | 0.00308552  |          |          |     |                 |
|    |                               | 36.75 | 0.2069 | 0.244559 | 0.00271779  |          |          |     |                 |
| 14 | Polymer<br>P(2-7)             | 37.43 | 0.3035 | 0.240271 | 0.00390901  | 0.976825 | 1.048013 | 8.5 | 58 %<br>(28/48) |
|    |                               | 39.82 | 0.1920 | 0.226384 | 0.00231302  |          |          |     |                 |
|    |                               | 41.34 | 0.1881 | 0.218405 | 0.00217547  |          |          |     |                 |
|    |                               | 42.23 | 0.3570 | 0.214006 | 0.00403375  |          |          |     |                 |
|    |                               | 43.70 | 0.2415 | 0.207142 | 0.00262789  |          |          |     |                 |
|    |                               | 44.54 | 0.2848 | 0.203429 | 0.00303448  |          |          |     |                 |
|    |                               | 45.74 | 0.3080 | 0.198367 | 0.00318612  |          |          |     |                 |
|    |                               | 46.70 | 0.2144 | 0.194511 | 0.00216699  |          |          |     |                 |
|    |                               | 47.43 | 0.0492 | 0.191686 | 0.00048870  |          |          |     |                 |
|    |                               | 47.67 | 0.1580 | 0.190777 | 0.00156051  |          |          |     |                 |
|    |                               | 47.96 | 0.4175 | 0.189691 | 0.00409542  |          |          |     |                 |
|    |                               | 50.70 | 0.1329 | 0.180064 | 0.00122399  |          |          |     |                 |
|    |                               | 51.04 | 0.4030 | 0.178944 | 0.00368329  |          |          |     |                 |
|    |                               | 52.75 | 0.3496 | 0.173539 | 0.00307630  |          |          |     |                 |
|    |                               | 56.03 | 0.2019 | 0.164133 | 0.00165579  |          |          |     |                 |
|    |                               | 56.89 | 0.1185 | 0.161854 | 0.00095448  |          |          |     |                 |
|    |                               | 59.80 | 0.4356 | 0.154655 | 0.00330536  |          |          |     |                 |
|    |                               | 61.49 | 0.3160 | 0.150804 | 0.00231803  |          |          |     |                 |
|    |                               | 62.32 | 0.1975 | 0.148994 | 0.00142517  |          |          |     |                 |
|    |                               | 65.38 | 0.1241 | 0.142741 | 0.00084378  |          |          |     |                 |
|    |                               | 65.66 | 0.2370 | 0.142200 | 0.00160278  |          |          |     |                 |
|    |                               | 71.88 | 0.1580 | 0.131349 | 0.00095098  |          |          |     |                 |
|    |                               | 73.10 | 0.1580 | 0.129455 | 0.00092998  |          |          |     |                 |
|    |                               | 10.86 | 0.2662 | 0.814689 | 0.01221927  |          |          |     |                 |
|    |                               | 11.47 | 0.0020 | 0.771496 | 8.6893E-05  |          |          |     |                 |
|    |                               | 11.90 | 0.2187 | 0.743713 | 0.00915602  |          |          |     |                 |
|    |                               | 13.89 | 0.1958 | 0.637578 | 0.00701368  |          |          |     |                 |
|    |                               | 14.74 | 0.2646 | 0.600997 | 0.00892602  |          |          |     |                 |
|    |                               | 16.47 | 0.2294 | 0.538238 | 0.00691616  |          |          |     |                 |
|    |                               | 17.43 | 0.0020 | 0.508803 | 5.6929E-05  |          |          |     |                 |
|    |                               | 17.95 | 0.2590 | 0.494179 | 0.00715538  |          |          |     |                 |
|    |                               | 19.80 | 0.2849 | 0.448404 | 0.00712270  |          |          |     |                 |
| 15 | Monomer<br>cocrystal<br>(3-7) | 20.27 | 0.5999 | 0.438112 | 0.01464307  | 0.978081 | 1.045323 | 7.3 | NA              |
|    |                               | 22.63 | 0.2671 | 0.392929 | 0.00582454  |          |          |     |                 |
|    |                               | 23.05 | 0.2523 | 0.385863 | 0.00539887  |          |          |     |                 |
|    |                               | 24.67 | 0.2375 | 0.360880 | 0.00473894  |          |          |     |                 |
|    |                               | 25.19 | 0.0020 | 0.353547 | 3.9057E-05  |          |          |     |                 |
|    |                               | 25.71 | 0.2421 | 0.346513 | 0.00462902  |          |          |     |                 |
|    |                               | 26.22 | 0.0020 | 0.339887 | 3.7471E-05  |          |          |     |                 |
|    |                               | 26.79 | 0.1254 | 0.332784 | 0.00229763  |          |          |     |                 |
|    |                               | 28.07 | 0.2496 | 0.317893 | 0.00435674  |          |          |     |                 |
|    |                               | 28.48 | 0.2595 | 0.313409 | 0.00446164  |          |          |     |                 |
|    |                               | 29.04 | 0.2867 | 0.307492 | 0.00483017  |          |          |     |                 |

|    |                               |       |        |          |            |          |          |      |    |
|----|-------------------------------|-------|--------|----------|------------|----------|----------|------|----|
|    |                               | 29.71 | 0.2024 | 0.300708 | 0.00332959 |          |          |      |    |
|    |                               | 30.52 | 0.4883 | 0.292910 | 0.00780962 |          |          |      |    |
|    |                               | 32.13 | 0.0020 | 0.278590 | 3.0304E-05 |          |          |      |    |
|    |                               | 32.65 | 0.2507 | 0.274271 | 0.00373475 |          |          |      |    |
|    |                               | 33.14 | 0.3160 | 0.270327 | 0.00463399 |          |          |      |    |
|    |                               | 33.50 | 0.1575 | 0.267504 | 0.00228339 |          |          |      |    |
|    |                               | 33.88 | 0.6674 | 0.264590 | 0.00956079 |          |          |      |    |
|    |                               | 36.24 | 0.3160 | 0.247883 | 0.00421349 |          |          |      |    |
|    |                               | 37.63 | 0.4740 | 0.239040 | 0.00607013 |          |          |      |    |
|    |                               | 39.13 | 0.3160 | 0.230216 | 0.00387965 |          |          |      |    |
|    |                               | 39.50 | 0.2765 | 0.228144 | 0.00336027 |          |          |      |    |
|    |                               | 40.03 | 0.1975 | 0.225245 | 0.00236573 |          |          |      |    |
|    |                               | 40.56 | 0.3160 | 0.222423 | 0.00373141 |          |          |      |    |
|    |                               | 42.15 | 0.3555 | 0.214394 | 0.00402516 |          |          |      |    |
|    |                               | 42.97 | 0.1185 | 0.210490 | 0.00131363 |          |          |      |    |
|    |                               | 43.48 | 0.3160 | 0.208139 | 0.00345777 |          |          |      |    |
|    |                               | 43.98 | 0.4740 | 0.205888 | 0.00512159 |          |          |      |    |
|    |                               | 44.52 | 0.3555 | 0.203515 | 0.00378966 |          |          |      |    |
|    |                               | 45.89 | 0.3160 | 0.197754 | 0.00325696 |          |          |      |    |
|    |                               | 46.85 | 0.3950 | 0.193923 | 0.00397804 |          |          |      |    |
|    |                               | 47.96 | 0.4345 | 0.189691 | 0.00426218 |          |          |      |    |
|    |                               | 49.38 | 0.2765 | 0.184563 | 0.00262424 |          |          |      |    |
|    |                               | 50.47 | 0.4345 | 0.180830 | 0.00402254 |          |          |      |    |
|    |                               | 51.49 | 0.2765 | 0.177485 | 0.00250181 |          |          |      |    |
|    |                               | 52.19 | 0.2370 | 0.175268 | 0.00211134 |          |          |      |    |
|    |                               | 54.38 | 0.2370 | 0.168716 | 0.00201302 |          |          |      |    |
|    |                               | 54.87 | 0.3160 | 0.167325 | 0.00265602 |          |          |      |    |
|    |                               | 55.64 | 0.3160 | 0.165191 | 0.00261293 |          |          |      |    |
|    |                               | 58.20 | 0.2765 | 0.158520 | 0.00216758 |          |          |      |    |
|    |                               | 59.40 | 0.3160 | 0.155601 | 0.00241731 |          |          |      |    |
|    |                               | 59.95 | 0.1975 | 0.154304 | 0.00149411 |          |          |      |    |
|    |                               | 60.53 | 0.0020 | 0.152964 | 1.4955E-05 |          |          |      |    |
|    |                               | 61.07 | 0.4603 | 0.151740 | 0.00340489 |          |          |      |    |
|    |                               | 62.32 | 0.9480 | 0.148994 | 0.00684083 |          |          |      |    |
|    |                               | 63.42 | 0.4618 | 0.146672 | 0.00326126 |          |          |      |    |
|    |                               | 64.19 | 0.1730 | 0.145097 | 0.00120358 |          |          |      |    |
|    |                               | 64.75 | 0.4826 | 0.143977 | 0.00332132 |          |          |      |    |
|    |                               | 65.36 | 0.5094 | 0.142780 | 0.00346483 |          |          |      |    |
|    |                               | 67.04 | 0.3505 | 0.139605 | 0.00230884 |          |          |      |    |
|    |                               | 68.00 | 0.2917 | 0.137866 | 0.00188698 |          |          |      |    |
|    |                               | 68.66 | 0.1531 | 0.136701 | 0.00097819 |          |          |      |    |
|    |                               | 70.08 | 0.2788 | 0.134275 | 0.00173476 |          |          |      |    |
|    |                               | 70.99 | 0.5541 | 0.132776 | 0.00339014 |          |          |      |    |
|    |                               | 74.76 | 0.9480 | 0.126987 | 0.00541414 |          |          |      |    |
|    |                               | 75.23 | 0.9480 | 0.126310 | 0.00536836 |          |          |      |    |
|    |                               | 11.58 | 0.1816 | 0.764192 | 0.00781440 |          |          |      |    |
|    |                               | 12.73 | 0.0083 | 0.695403 | 0.00032466 |          |          |      |    |
|    |                               | 12.93 | 0.1371 | 0.684692 | 0.00527911 |          |          |      |    |
|    |                               | 13.84 | 0.1755 | 0.639870 | 0.00630946 |          |          |      |    |
|    |                               | 15.73 | 0.3361 | 0.563388 | 0.01061622 |          |          |      |    |
|    |                               | 16.21 | 0.0938 | 0.546812 | 0.00287395 |          |          |      |    |
|    |                               | 16.37 | 0.3098 | 0.541503 | 0.00939798 |          |          |      |    |
|    |                               | 18.31 | 0.2019 | 0.484543 | 0.00546638 |          |          |      |    |
|    |                               | 20.71 | 0.1860 | 0.428902 | 0.00444159 |          |          |      |    |
|    |                               | 22.58 | 0.2765 | 0.393787 | 0.00604323 |          |          |      |    |
|    |                               | 22.80 | 0.0673 | 0.390037 | 0.00145635 |          |          |      |    |
|    |                               | 23.04 | 0.1836 | 0.386028 | 0.00393054 |          |          |      |    |
|    |                               | 23.60 | 0.0932 | 0.376994 | 0.00194658 |          |          |      |    |
|    |                               | 23.80 | 0.1275 | 0.373871 | 0.00263995 |          |          |      |    |
|    |                               | 24.05 | 0.1185 | 0.370041 | 0.00242734 |          |          |      |    |
|    |                               | 24.30 | 0.1580 | 0.366290 | 0.00320215 |          |          |      |    |
|    |                               | 25.52 | 0.2370 | 0.349049 | 0.00456640 |          |          |      |    |
| 16 | Monomer<br>cocrystal<br>(4-7) | 25.82 | 0.0790 | 0.345061 | 0.00150384 | 0.977514 | 1.046536 | 11.3 | NA |
|    |                               | 28.78 | 0.1464 | 0.310210 | 0.00248973 |          |          |      |    |
|    |                               | 29.45 | 0.1340 | 0.303304 | 0.00222473 |          |          |      |    |
|    |                               | 30.94 | 0.2089 | 0.289029 | 0.00329345 |          |          |      |    |
|    |                               | 32.61 | 0.2704 | 0.274599 | 0.00403344 |          |          |      |    |
|    |                               | 33.65 | 0.2919 | 0.266346 | 0.00421190 |          |          |      |    |
|    |                               | 34.39 | 0.1019 | 0.260782 | 0.00143679 |          |          |      |    |
|    |                               | 34.51 | 0.2648 | 0.259903 | 0.00371988 |          |          |      |    |
|    |                               | 34.75 | 0.1205 | 0.258163 | 0.00168034 |          |          |      |    |
|    |                               | 34.93 | 0.1816 | 0.256874 | 0.00251847 |          |          |      |    |
|    |                               | 35.24 | 0.3160 | 0.254685 | 0.00434130 |          |          |      |    |
|    |                               | 36.74 | 0.1355 | 0.244624 | 0.00178042 |          |          |      |    |
|    |                               | 37.00 | 0.1442 | 0.242964 | 0.00188045 |          |          |      |    |
|    |                               | 38.76 | 0.1056 | 0.232328 | 0.00130988 |          |          |      |    |
|    |                               | 38.94 | 0.1814 | 0.231295 | 0.00223887 |          |          |      |    |
|    |                               | 41.20 | 0.1797 | 0.219115 | 0.00208604 |          |          |      |    |
|    |                               | 41.48 | 0.0007 | 0.217700 | 8.066E-060 |          |          |      |    |
|    |                               | 41.83 | 0.0890 | 0.215959 | 0.00101615 |          |          |      |    |

|    |                               |       |        |          |            |          |          |     |    |
|----|-------------------------------|-------|--------|----------|------------|----------|----------|-----|----|
|    |                               | 41.97 | 0.0763 | 0.215271 | 0.00086797 |          |          |     |    |
|    |                               | 43.43 | 0.0790 | 0.208367 | 0.00086554 |          |          |     |    |
|    |                               | 44.17 | 0.1580 | 0.205046 | 0.00169908 |          |          |     |    |
|    |                               | 45.50 | 0.1185 | 0.199357 | 0.00123303 |          |          |     |    |
|    |                               | 46.48 | 0.1185 | 0.195380 | 0.00120405 |          |          |     |    |
|    |                               | 48.41 | 0.1891 | 0.188032 | 0.00183551 |          |          |     |    |
|    |                               | 48.57 | 0.1016 | 0.187450 | 0.00098252 |          |          |     |    |
|    |                               | 52.46 | 0.2183 | 0.174430 | 0.00193321 |          |          |     |    |
|    |                               | 53.00 | 0.1555 | 0.172779 | 0.00136085 |          |          |     |    |
|    |                               | 54.93 | 0.0785 | 0.167157 | 0.00065896 |          |          |     |    |
|    |                               | 55.63 | 0.1127 | 0.165218 | 0.00093209 |          |          |     |    |
|    |                               | 55.79 | 0.1643 | 0.164782 | 0.00135426 |          |          |     |    |
|    |                               | 57.11 | 0.1857 | 0.161283 | 0.00148892 |          |          |     |    |
|    |                               | 59.61 | 0.1962 | 0.155103 | 0.00149450 |          |          |     |    |
|    |                               | 59.78 | 0.2028 | 0.154702 | 0.00153948 |          |          |     |    |
|    |                               | 66.50 | 0.1665 | 0.140607 | 0.00110809 |          |          |     |    |
|    |                               | 66.68 | 0.1340 | 0.140271 | 0.00088875 |          |          |     |    |
|    |                               | 66.88 | 0.1205 | 0.139900 | 0.00079618 |          |          |     |    |
|    |                               | 67.25 | 0.2156 | 0.139220 | 0.00141458 |          |          |     |    |
|    |                               | 72.36 | 0.1090 | 0.130596 | 0.00065030 |          |          |     |    |
|    |                               | 72.61 | 0.1813 | 0.130207 | 0.00107672 |          |          |     |    |
|    |                               | 73.42 | 0.0790 | 0.128970 | 0.00046229 |          |          |     |    |
|    |                               | 75.67 | 0.1309 | 0.125685 | 0.00073541 |          |          |     |    |
|    |                               | 75.87 | 0.1115 | 0.125403 | 0.00062416 |          |          |     |    |
|    |                               | 76.58 | 0.2078 | 0.124417 | 0.00114849 |          |          |     |    |
|    |                               | 79.57 | 0.1625 | 0.120476 | 0.00085147 |          |          |     |    |
|    |                               | 11.05 | 0.4549 | 0.800723 | 0.02051987 |          |          |     |    |
|    |                               | 11.24 | 0.5510 | 0.787230 | 0.02443202 |          |          |     |    |
|    |                               | 12.30 | 0.4040 | 0.719616 | 0.01635964 |          |          |     |    |
|    |                               | 15.74 | 0.1009 | 0.563032 | 0.00318503 |          |          |     |    |
|    |                               | 16.65 | 0.0903 | 0.532459 | 0.00269260 |          |          |     |    |
|    |                               | 16.92 | 0.0731 | 0.524023 | 0.00214444 |          |          |     |    |
|    |                               | 17.90 | 0.1154 | 0.495548 | 0.00319720 |          |          |     |    |
|    |                               | 18.87 | 0.2302 | 0.470288 | 0.00604439 |          |          |     |    |
|    |                               | 19.01 | 0.1896 | 0.466856 | 0.00494102 |          |          |     |    |
|    |                               | 19.48 | 0.1889 | 0.455697 | 0.00480177 |          |          |     |    |
|    |                               | 19.71 | 0.2090 | 0.450431 | 0.00524949 |          |          |     |    |
|    |                               | 20.11 | 0.1019 | 0.441561 | 0.00250750 |          |          |     |    |
|    |                               | 20.35 | 0.1411 | 0.436408 | 0.00343031 |          |          |     |    |
|    |                               | 20.57 | 0.0719 | 0.431790 | 0.00172888 |          |          |     |    |
|    |                               | 21.10 | 0.1444 | 0.421062 | 0.00338304 |          |          |     |    |
|    |                               | 21.38 | 0.0233 | 0.415610 | 0.00053856 |          |          |     |    |
|    |                               | 21.64 | 0.2765 | 0.410675 | 0.00631251 |          |          |     |    |
|    |                               | 21.89 | 0.2765 | 0.406041 | 0.00623866 |          |          |     |    |
|    |                               | 22.21 | 0.2765 | 0.400263 | 0.00614653 |          |          |     |    |
|    |                               | 22.51 | 0.2765 | 0.394996 | 0.00606251 |          |          |     |    |
|    |                               | 23.22 | 0.1703 | 0.383076 | 0.00361677 |          |          |     |    |
|    |                               | 24.26 | 0.1556 | 0.366885 | 0.00315887 |          |          |     |    |
|    |                               | 24.49 | 0.1993 | 0.363491 | 0.00400687 |          |          |     |    |
|    |                               | 25.08 | 0.0012 | 0.355072 | 2.354E-050 |          |          |     |    |
|    |                               | 25.66 | 0.1182 | 0.347177 | 0.00226457 |          |          |     |    |
|    |                               | 25.89 | 0.0735 | 0.344144 | 0.00139523 |          |          |     |    |
| 17 | Monomer<br>cocrystal<br>(5-7) | 26.74 | 0.1713 | 0.333395 | 0.00314472 | 0.977034 | 1.047564 | 8.0 | NA |
|    |                               | 26.89 | 0.1212 | 0.331569 | 0.00221211 |          |          |     |    |
|    |                               | 27.16 | 0.1011 | 0.328334 | 0.00182621 |          |          |     |    |
|    |                               | 28.04 | 0.2146 | 0.318226 | 0.00374999 |          |          |     |    |
|    |                               | 28.35 | 0.1079 | 0.314817 | 0.00186401 |          |          |     |    |
|    |                               | 28.80 | 0.1581 | 0.309999 | 0.00268675 |          |          |     |    |
|    |                               | 30.70 | 0.2011 | 0.291233 | 0.00319651 |          |          |     |    |
|    |                               | 30.97 | 0.1690 | 0.288755 | 0.00266169 |          |          |     |    |
|    |                               | 31.51 | 0.4081 | 0.283929 | 0.00631168 |          |          |     |    |
|    |                               | 32.18 | 0.2765 | 0.278169 | 0.00418261 |          |          |     |    |
|    |                               | 32.70 | 0.2765 | 0.273863 | 0.00411244 |          |          |     |    |
|    |                               | 33.14 | 0.1451 | 0.270327 | 0.00212782 |          |          |     |    |
|    |                               | 33.55 | 0.1130 | 0.267117 | 0.00163566 |          |          |     |    |
|    |                               | 34.21 | 0.1308 | 0.262113 | 0.00185459 |          |          |     |    |
|    |                               | 34.47 | 0.0718 | 0.260195 | 0.00100988 |          |          |     |    |
|    |                               | 34.98 | 0.2107 | 0.256518 | 0.00291759 |          |          |     |    |
|    |                               | 36.83 | 0.2274 | 0.244047 | 0.00298012 |          |          |     |    |
|    |                               | 37.47 | 0.0012 | 0.240024 | 1.5438E-05 |          |          |     |    |
|    |                               | 38.18 | 0.0856 | 0.235722 | 0.00107921 |          |          |     |    |
|    |                               | 38.38 | 0.2990 | 0.234540 | 0.00374850 |          |          |     |    |
|    |                               | 39.62 | 0.3254 | 0.227481 | 0.00394156 |          |          |     |    |
|    |                               | 40.08 | 0.2765 | 0.224975 | 0.00330753 |          |          |     |    |
|    |                               | 40.64 | 0.1717 | 0.222004 | 0.00202313 |          |          |     |    |
|    |                               | 40.95 | 0.2025 | 0.220395 | 0.00236637 |          |          |     |    |
|    |                               | 43.22 | 0.2765 | 0.209331 | 0.00304561 |          |          |     |    |
|    |                               | 43.46 | 0.2179 | 0.208230 | 0.00238554 |          |          |     |    |
|    |                               | 44.22 | 0.2120 | 0.204826 | 0.00227692 |          |          |     |    |
|    |                               | 45.77 | 0.1975 | 0.198244 | 0.00204155 |          |          |     |    |



|       |        |          |            |
|-------|--------|----------|------------|
| 46.64 | 0.5530 | 0.194747 | 0.00559735 |
| 47.02 | 0.5530 | 0.193261 | 0.00554668 |
| 48.69 | 0.1767 | 0.187016 | 0.00170400 |
| 49.67 | 0.2469 | 0.183554 | 0.00232777 |
| 49.89 | 0.1630 | 0.182796 | 0.00152905 |
| 50.15 | 0.0932 | 0.181909 | 0.00086912 |
| 50.60 | 0.3935 | 0.180396 | 0.00363227 |
| 52.09 | 0.1266 | 0.175581 | 0.00113033 |
| 52.40 | 0.2156 | 0.174615 | 0.00191182 |
| 52.73 | 0.5530 | 0.173600 | 0.00486826 |
| 53.18 | 0.1024 | 0.172237 | 0.00089264 |
| 53.36 | 0.1230 | 0.171698 | 0.00106802 |
| 54.69 | 0.1831 | 0.167833 | 0.00154491 |
| 55.52 | 0.1084 | 0.165519 | 0.00089861 |
| 56.27 | 0.5530 | 0.163490 | 0.00451236 |
| 56.56 | 0.1954 | 0.162720 | 0.00158476 |
| 56.77 | 0.3663 | 0.162168 | 0.00295782 |
| 57.38 | 0.1653 | 0.160588 | 0.00131795 |
| 57.56 | 0.1758 | 0.160129 | 0.00139645 |
| 58.27 | 0.2892 | 0.158346 | 0.00226388 |
| 58.82 | 0.3090 | 0.156996 | 0.00239181 |
| 60.88 | 0.0220 | 0.152168 | 0.00016335 |
| 61.13 | 0.5361 | 0.151605 | 0.00396085 |
| 61.49 | 0.1819 | 0.150804 | 0.00133434 |
| 61.69 | 0.1246 | 0.150363 | 0.00091039 |
| 61.88 | 0.2404 | 0.149947 | 0.00174988 |
| 63.32 | 0.2582 | 0.146879 | 0.00182699 |
| 63.51 | 0.1550 | 0.146486 | 0.00109270 |
| 63.70 | 0.1969 | 0.146095 | 0.00138295 |
| 64.35 | 0.1396 | 0.144775 | 0.00096820 |
| 65.45 | 0.2786 | 0.142606 | 0.00189171 |
| 65.64 | 0.1230 | 0.142239 | 0.00083214 |
| 65.83 | 0.2882 | 0.141874 | 0.00194270 |
| 66.45 | 0.1021 | 0.140700 | 0.00068014 |
| 66.95 | 0.0851 | 0.139771 | 0.00056153 |
| 67.21 | 0.0378 | 0.139293 | 0.00024820 |
| 67.37 | 0.5530 | 0.139001 | 0.00362007 |
| 70.11 | 0.3121 | 0.134225 | 0.00194087 |
| 70.64 | 0.1672 | 0.133347 | 0.00102961 |
| 70.85 | 0.2021 | 0.133003 | 0.00123971 |
| 71.49 | 0.1445 | 0.131969 | 0.00087598 |
| 71.69 | 0.1636 | 0.131650 | 0.00098813 |
| 72.05 | 0.0632 | 0.131081 | 0.00037921 |
| 73.16 | 0.2119 | 0.129364 | 0.00124587 |
| 74.14 | 0.1144 | 0.127895 | 0.00066073 |
| 74.38 | 0.5475 | 0.127541 | 0.00314843 |
| 75.17 | 0.1031 | 0.126396 | 0.00058447 |
| 76.55 | 0.0666 | 0.124458 | 0.00036829 |
| 76.89 | 0.4941 | 0.123992 | 0.00271571 |

<sup>a</sup> The peak position ( $2\theta$ ) and full-width-of-half-maximum (FWHM) are generated from PXRD spectra and Match! software. <sup>b</sup> The  $d_{hkl}$  spacing values are calculated from equation (3). <sup>c</sup> The microstrain ( $\epsilon$ ) values are calculated from equation (4). <sup>d</sup> The crystallite sizes are calculated from equations (1) and (2) and the intercept values from Fig. S7. <sup>e</sup> The dislocation densities are calculated from equation (5). <sup>f</sup>  $R_p$  is the R factor in Rietveld refinement, showing the discrepancy index between the experimental and calculated spectra. Normally,  $R_p$  less than 10% indicates a good fit. <sup>g</sup> Match ratio (%) = (the number of peaks of the polymer identically matched with those of the monomer (red)) /  $\Sigma$ {(the number of peaks of the polymer identically matched with those of the monomer) + (the number of shifted peaks in the polymer (blue)) + (the number of new peaks appeared in the polymer (green, if applicable)) + (the number of peaks present in the monomer but disappeared in the polymer (green, if applicable))}  $\times$  100%. The matching ratio was calculated in pairs (entries 10 vs 11 and entries 13 vs 14).

## 7. $I_{405}$ and $I_{488}$ values

**Table S3**  $I_{405}$  and  $I_{488}$  values determined with CM showing XB-Driven AIEE (Step 1) and XB-Driven CEE via SPP (Steps 2 and 3) (Figs. S18 and S19)

| Entry | Mode <sup>a</sup>       | Sample <sup>b</sup> | $I_{405}$<br>(a.u.) <sup>c</sup> | $I_{488}$<br>(a.u.) <sup>c</sup> | $I_{488}$<br>increasing<br>ratio (times,<br>×) | Entry           | Mode <sup>a</sup>       | Sample <sup>b</sup> | $I_{405}$<br>(a.u.) <sup>c</sup> | $I_{488}$<br>(a.u.) <sup>c</sup> | $I_{488}$<br>increasing<br>ratio<br>(times, ×) |
|-------|-------------------------|---------------------|----------------------------------|----------------------------------|------------------------------------------------|-----------------|-------------------------|---------------------|----------------------------------|----------------------------------|------------------------------------------------|
| 1     | Pure linker             | <b>1</b>            | NA <sup>d</sup>                  | 1.17                             |                                                | 21 <sup>e</sup> | Pure linker             | <b>1</b>            | NA <sup>d</sup>                  | 1.17                             |                                                |
| 2     | 4-comp<br>monomer solid | <b>1-6</b>          | NA <sup>d</sup>                  | 4.16                             | ×3.6<br>from <b>1</b>                          | 22              | 4-comp<br>monomer solid | <b>1-7</b>          | NA <sup>d</sup>                  | 1.71                             | ×1.5<br>from <b>1</b>                          |
| 3     | 3-comp<br>polymer sheet | <b>P(1-6)</b>       | NA <sup>d</sup>                  | 22.3                             | ×5.4<br>from <b>1-6</b>                        | 23              | 3-comp polymer<br>sheet | <b>P(1-7)</b>       | NA <sup>d</sup>                  | 17.5                             | ×10<br>from <b>1-7</b>                         |
| 4     | 4-comp<br>polymer sheet | <b>P(1-6)</b>       | NA <sup>d</sup>                  | 129                              | ×31<br>from <b>1-6</b>                         | 24              | 4-comp polymer<br>sheet | <b>P(1-7)</b>       | NA <sup>d</sup>                  | 40.5                             | ×24<br>from <b>1-7</b>                         |
| 5     | Pure linker             | <b>2</b>            | 79.3                             | 7.10                             |                                                | 25 <sup>e</sup> | Pure linker             | <b>2</b>            | 79.3                             | 7.10                             |                                                |
| 6     | 4-comp<br>monomer solid | <b>2-6</b>          | 214                              | 19.8                             | ×2.8<br>from <b>2</b>                          | 26              | 4-comp<br>monomer solid | <b>2-7</b>          | 183                              | 10.0                             | ×1.4<br>from <b>2</b>                          |
| 7     | 3-comp<br>polymer sheet | <b>P(2-6)</b>       | NA <sup>d</sup>                  | 82.7                             | ×4.2<br>from <b>2-6</b>                        | 27              | 3-comp polymer<br>sheet | <b>P(2-7)</b>       | NA <sup>d</sup>                  | 45.1                             | ×4.5<br>from <b>2-7</b>                        |
| 8     | 4-comp<br>polymer sheet | <b>P(2-6)</b>       | NA <sup>d</sup>                  | 87.3                             | ×4.4<br>from <b>2-6</b>                        | 28              | 4-comp polymer<br>sheet | <b>P(2-7)</b>       | NA <sup>d</sup>                  | 200                              | ×20<br>from <b>2-7</b>                         |
| 9     | Pure linker             | <b>3</b>            | 223                              | 6.14                             |                                                | 29 <sup>e</sup> | Pure linker             | <b>3</b>            | 223                              | 6.14                             |                                                |
| 10    | 4-comp<br>monomer solid | <b>3-6</b>          | 244                              | 9.44                             | ×1.5<br>from <b>3</b>                          | 30              | 4-comp<br>monomer solid | <b>3-7</b>          | NA <sup>d</sup>                  | 14.5                             | ×2.4<br>from <b>3</b>                          |
| 11    | 3-comp<br>polymer sheet | <b>P(3-6)</b>       | NA <sup>d</sup>                  | 212                              | ×22<br>from <b>3-6</b>                         | 31              | 3-comp polymer<br>sheet | <b>P(3-7)</b>       | NA <sup>d</sup>                  | 120                              | ×8.3<br>from <b>3-7</b>                        |
| 12    | 4-comp<br>polymer sheet | <b>P(3-6)</b>       | NA <sup>d</sup>                  | 221                              | ×23<br>from <b>3-6</b>                         | 32              | 4-comp polymer<br>sheet | <b>P(3-7)</b>       | NA <sup>d</sup>                  | 130                              | ×8.9<br>from <b>3-7</b>                        |
| 13    | Pure linker             | <b>4</b>            | 41.4                             | 0.40                             |                                                | 33 <sup>e</sup> | Pure linker             | <b>4</b>            | 41.4                             | 0.40                             |                                                |
| 14    | 4-comp<br>monomer solid | <b>4-6</b>          | 252                              | 16.3                             | ×41<br>from <b>4</b>                           | 34              | 4-comp<br>monomer solid | <b>4-7</b>          | NA <sup>d</sup>                  | 8.61                             | ×22<br>from <b>4</b>                           |
| 15    | 3-comp<br>polymer sheet | <b>P(4-6)</b>       | NA <sup>d</sup>                  | 56.7                             | ×3.5<br>from <b>4-6</b>                        | 35              | 3-comp polymer<br>sheet | <b>P(4-7)</b>       | NA <sup>d</sup>                  | 57.7                             | ×6.7<br>from <b>4-7</b>                        |
| 16    | 4-comp<br>polymer sheet | <b>P(4-6)</b>       | NA <sup>d</sup>                  | 61.3                             | ×3.8<br>from <b>4-6</b>                        | 36              | 4-comp polymer<br>sheet | <b>P(4-7)</b>       | NA <sup>d</sup>                  | 184                              | ×21<br>from <b>4-7</b>                         |
| 17    | Pure L                  | <b>5</b>            | 1.57                             | 0.059                            |                                                | 37 <sup>e</sup> | Pure L                  | <b>5</b>            | 1.57                             | 0.059                            |                                                |
| 18    | 4-comp<br>monomer solid | <b>5-6</b>          | 160                              | 8.99                             | ×150<br>from <b>5</b>                          | 38              | 4-comp<br>monomer solid | <b>5-7</b>          | 24.9                             | 0.310                            | ×5.3<br>from <b>5</b>                          |
| 19    | 3-comp<br>polymer sheet | <b>P(5-6)</b>       | NA <sup>d</sup>                  | 12.3                             | ×1.4<br>from <b>5-6</b>                        | 39              | 3-comp polymer<br>sheet | <b>P(5-7)</b>       | NA <sup>d</sup>                  | 44.0                             | ×140<br>from <b>5-7</b>                        |
| 20    | 4-comp<br>polymer sheet | <b>P(5-6)</b>       | NA <sup>d</sup>                  | 16.3                             | ×1.8<br>from <b>5-6</b>                        | 40              | 4-comp polymer<br>sheet | <b>P(5-7)</b>       | NA <sup>d</sup>                  | 52.5                             | ×170<br>from <b>5-7</b>                        |

<sup>a</sup> 4-comp monomer solid = four-component monomer solid (step 1), 3-comp polymer sheet = three-component polymer sheet (covalently non-crosslinked system) (step 2), and 4-comp polymer sheet = four-component polymer sheet (covalently crosslinked system) (step 3). <sup>b</sup> P denotes polymer. <sup>c</sup>  $I_{405}$  and  $I_{488}$  values were determined from CM emission intensities at 498 nm and 564 nm, respectively, at a constant area (10  $\mu\text{m} \times 10 \mu\text{m}$ ) for all entries. <sup>d</sup> Not analyzable (> 255 a.u.) due to the detection limit of instrument ( $\lambda_{\text{ex}} = 405 \text{ nm}$ ). <sup>e</sup> Entry 21 = entry 1, entry 25 = entry 5, entry 29 = entry 9, entry 33 = entry 13, and entry 37 = entry 17.

**Table S4**  $I_{405}$  and  $I_{488}$  values of linker **5** in the pure and polymer-embedded forms determined with PL spectroscopy (Fig. 3)

| Entry | Sample                                                                             | $I_{405}$ (a.u.) <sup>a</sup> | $I_{488}$ (a.u.) <sup>a</sup> | $I_{405}$ increasing ratio (times, ×) | $I_{488}$ increasing ratio (times, ×) |
|-------|------------------------------------------------------------------------------------|-------------------------------|-------------------------------|---------------------------------------|---------------------------------------|
| 1     | Pure linker <b>5</b>                                                               | 358                           | 0.152                         |                                       |                                       |
| 2     | Linker <b>5</b> embedded in P4VP by casting                                        | 1720                          | 86.6                          | ×5 from <b>5</b>                      | ×570 from <b>5</b>                    |
| 3     | Linker <b>5</b> embedded in PMMA by casting                                        | 415                           | 18.3                          | ×1.2 from <b>5</b>                    | ×120 from <b>5</b>                    |
| 4     | Linker <b>5</b> embedded in P4VP by SPP (3-component polymer sheet <b>P(5·6)</b> ) | 3220                          | 90.9                          | ×9 from <b>5</b>                      | ×600 from <b>5</b>                    |

<sup>a</sup>  $I_{405}$  and  $I_{488}$  values were determined from PL spectra area integrated at 503–635 nm and 420–585 nm, respectively.

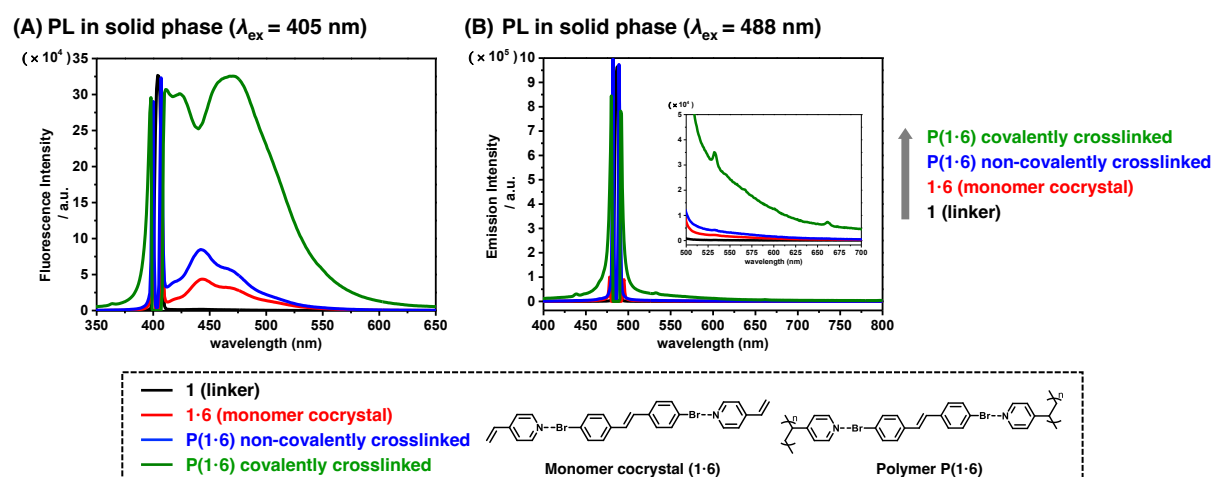

**Fig. S9.** PL spectra with (A)  $\lambda_{\text{ex}} = 405$  nm and (B)  $\lambda_{\text{ex}} = 488$  nm for linker **1** (black solid lines), 4-component monomer cocrystal solid (**1·6**) (red solid lines), 3-component non-covalently crosslinked polymer **P(1·6)** (blue solid lines), and 4-component covalently crosslinked polymer **P(1·6)** (green solid lines). All the sample mass was 0.10 g with a thickness of 1 mm.

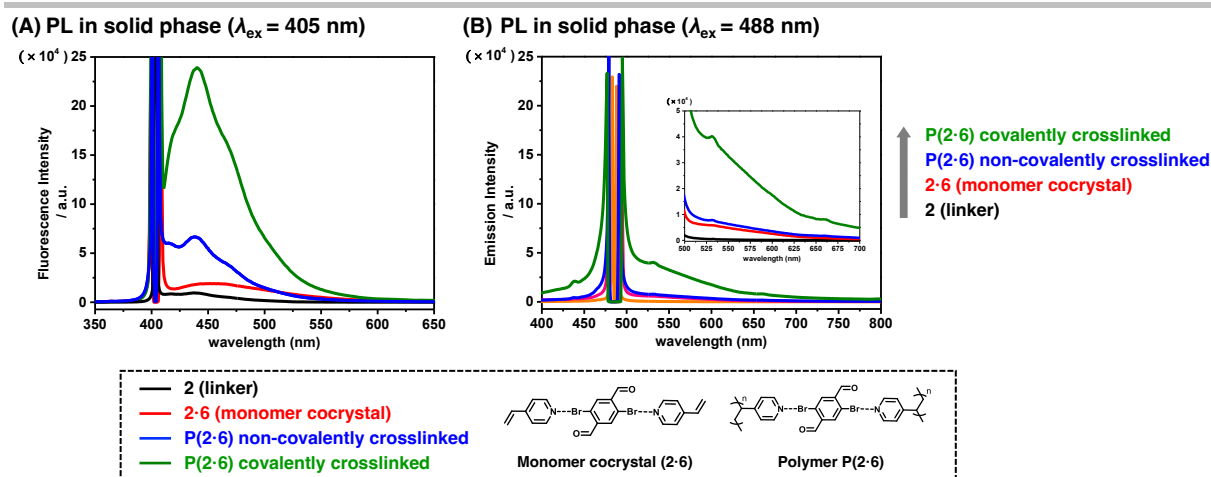

**Fig. S10.** PL spectra with (A)  $\lambda_{\text{ex}} = 405$  nm and (B)  $\lambda_{\text{ex}} = 488$  nm for linker **2** (black solid lines), 4-component monomer cocrystal solid (**2·6**) (red solid lines), 3-component non-covalently crosslinked polymer **P(2·6)** (blue solid lines), and 4-component covalently crosslinked polymer **P(2·6)** (green solid lines). All the sample mass was 0.10 g with a thickness of 1 mm.

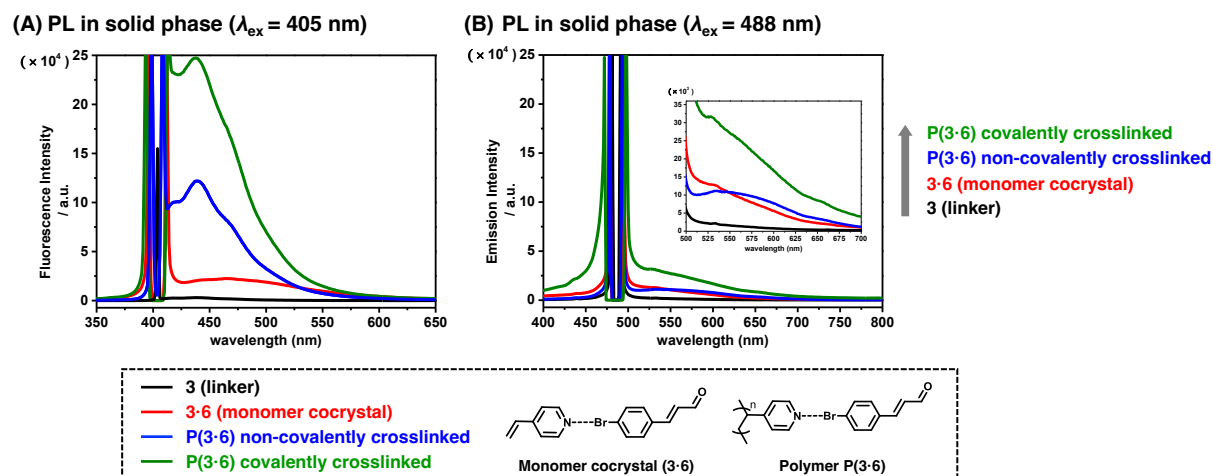

**Fig. S11.** PL spectra with (A)  $\lambda_{\text{ex}} = 405$  nm and (B)  $\lambda_{\text{ex}} = 488$  nm for linker **3** (black solid lines), 4-component monomer cocrystal solid (**3·6**) (red solid lines), 3-component non-covalently crosslinked polymer **P(3·6)** (blue solid lines), and 4-component covalently crosslinked polymer **P(3·6)** (green solid lines). All the sample mass was 0.10 g with a thickness of 1 mm.

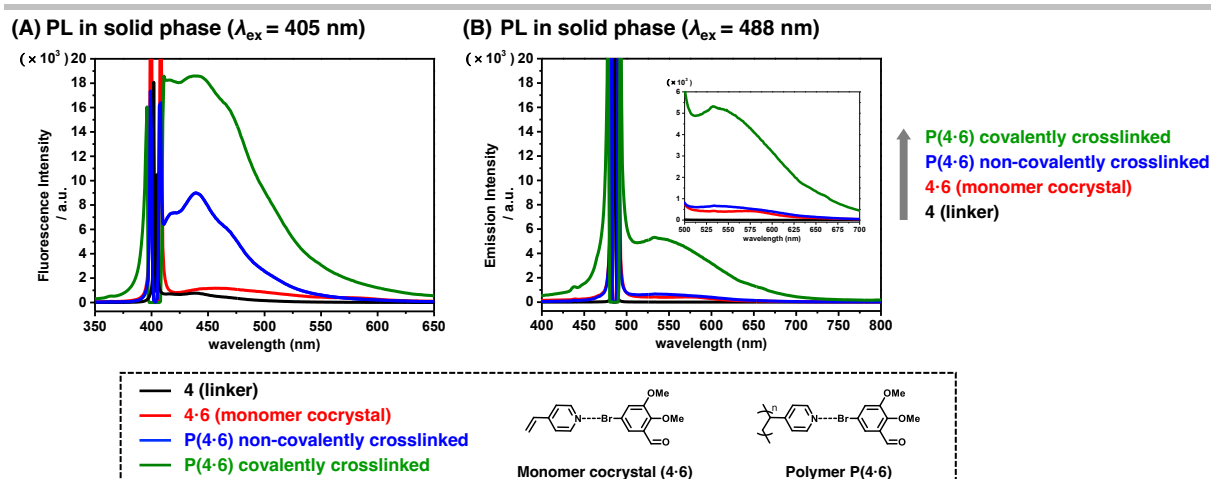

**Fig. S12.** PL spectra with (A)  $\lambda_{ex} = 405$  nm and (B)  $\lambda_{ex} = 488$  nm for linker **4** (black solid lines), 4-component monomer cocrystal solid (**4·6**) (red solid lines), 3-component non-covalently crosslinked polymer **P(4·6)** (blue solid lines), and 4-component covalently crosslinked polymer **P(4·6)** (green solid lines). All the sample mass was 0.10 g with a thickness of 1 mm.

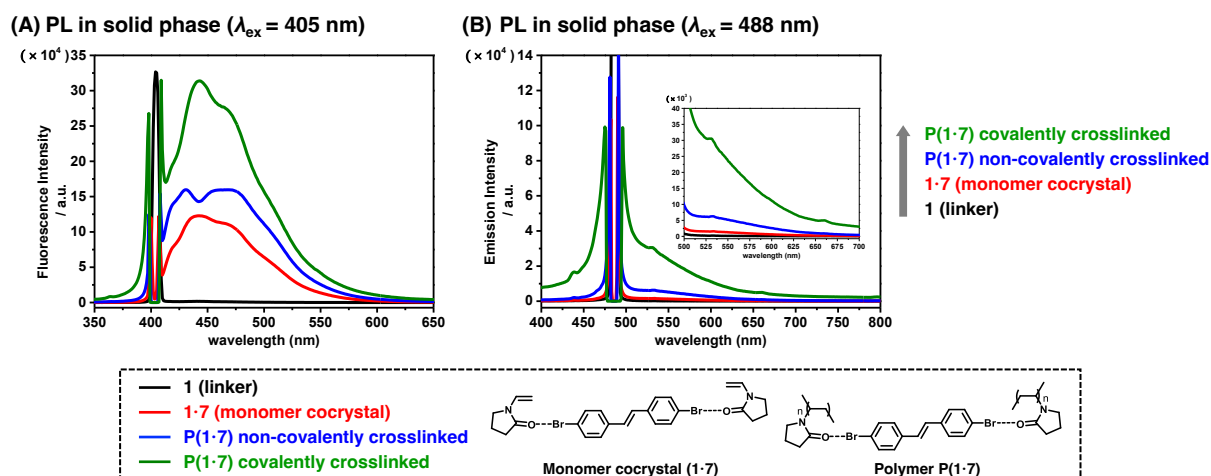

**Fig. S13.** PL spectra with (A)  $\lambda_{ex} = 405$  nm and (B)  $\lambda_{ex} = 488$  nm for linker **1** (black solid lines), 4-component monomer cocrystal solid (**1·7**) (red solid lines), 3-component non-covalently crosslinked polymer **P(1·7)** (blue solid lines), and 4-component covalently crosslinked polymer **P(1·7)** (green solid lines). All the sample mass was 0.10 g with a thickness of 1 mm.

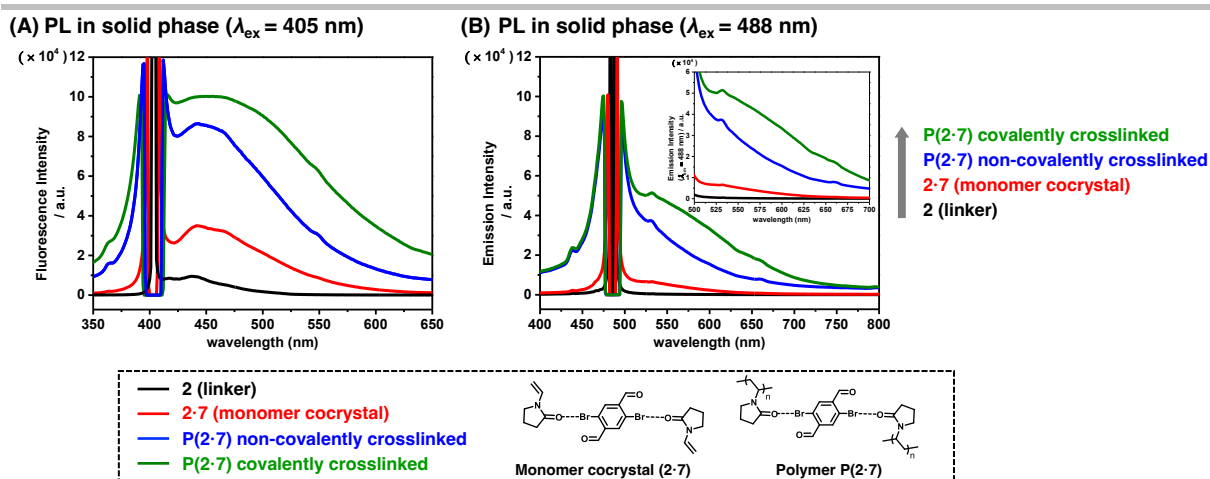

**Fig. S14.** PL spectra with (A)  $\lambda_{\text{ex}} = 405$  nm and (B)  $\lambda_{\text{ex}} = 488$  nm for linker **2** (black solid lines), 4-component monomer cocrystal solid (**2·7**) (red solid lines), 3-component non-covalently crosslinked polymer **P(2·7)** (blue solid lines), and 4-component covalently crosslinked polymer **P(2·7)** (green solid lines). All the sample mass was 0.10 g with a thickness of 1 mm.

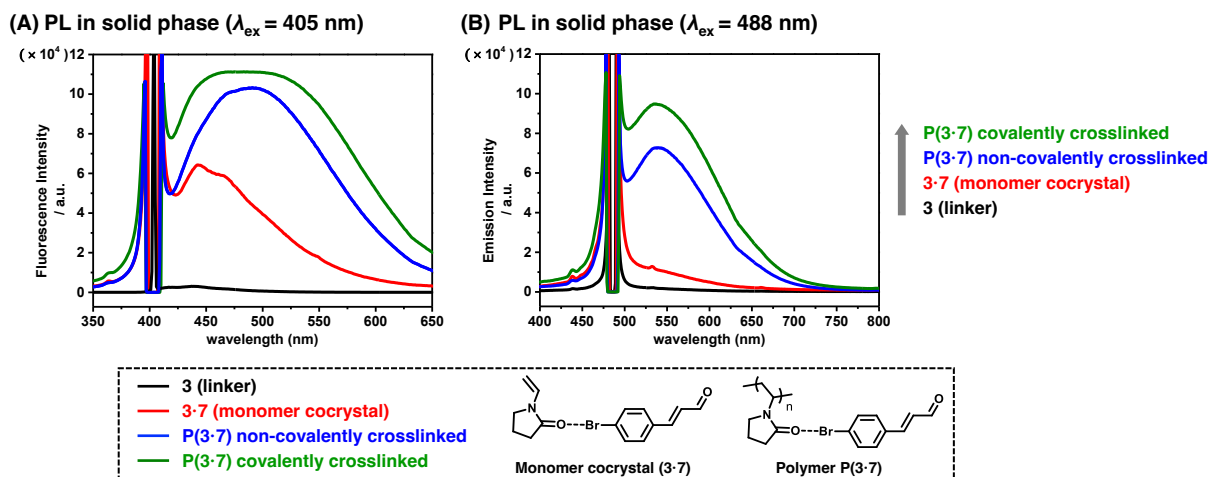

**Fig. S15.** PL spectra with (A)  $\lambda_{\text{ex}} = 405$  nm and (B)  $\lambda_{\text{ex}} = 488$  nm for linker **3** (black solid lines), 4-component monomer cocrystal solid (**3·7**) (red solid lines), 3-component non-covalently crosslinked polymer **P(3·7)** (blue solid lines), and 4-component covalently crosslinked polymer **P(3·7)** (green solid lines). All the sample mass was 0.10 g with a thickness of 1 mm.

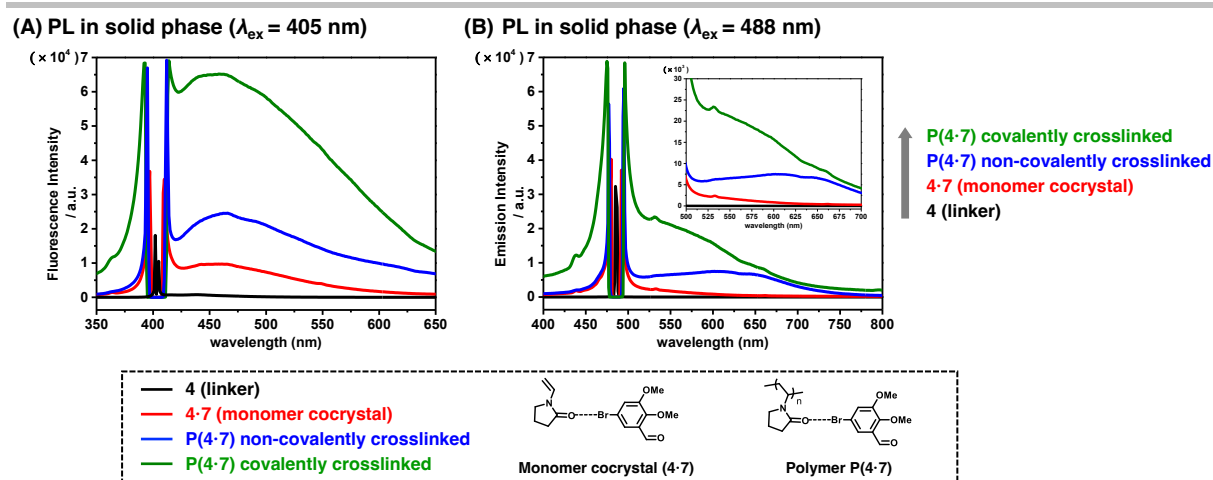

**Fig. S16.** PL spectra with (A)  $\lambda_{ex} = 405$  nm and (B)  $\lambda_{ex} = 488$  nm for linker **4** (black solid lines), 4-component monomer cocrystal solid (**4·7**) (red solid lines), 3-component non-covalently crosslinked polymer **P(4·7)** (blue solid lines), and 4-component covalently crosslinked polymer **P(4·7)** (green solid lines). All the sample mass was 0.10 g with a thickness of 1 mm.

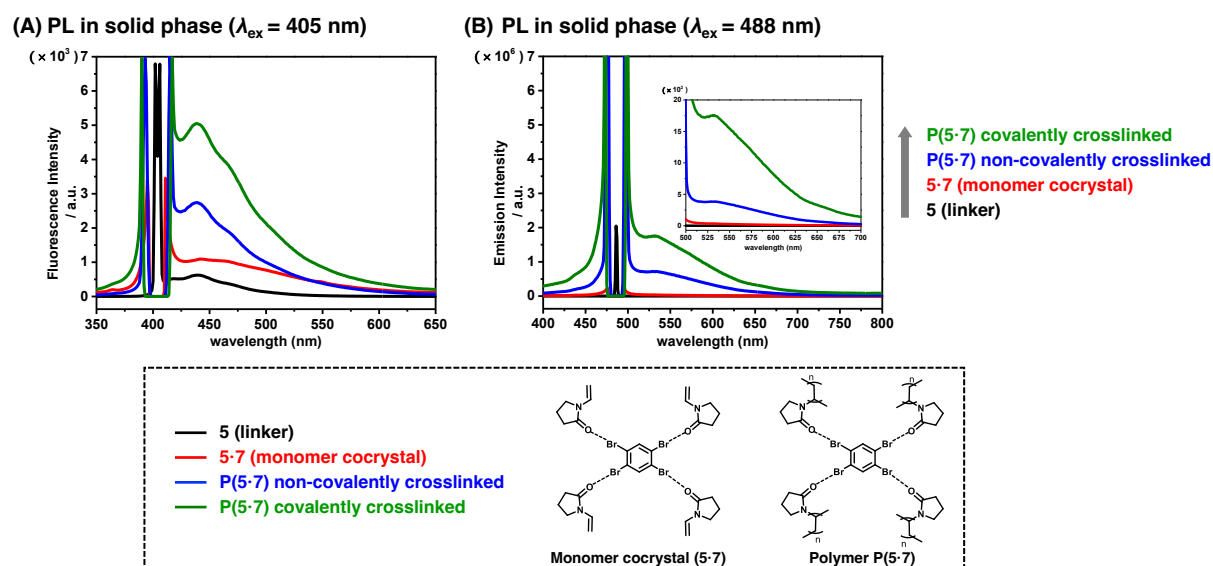

**Fig. S17.** PL spectra with (A)  $\lambda_{ex} = 405$  nm and (B)  $\lambda_{ex} = 488$  nm for linker **5** (black solid lines), 4-component monomer cocrystal solid (**5·7**) (red solid lines), 3-component non-covalently crosslinked polymer **P(5·7)** (blue solid lines), and 4-component covalently crosslinked polymer **P(5·7)** (green solid lines). All the sample mass was 0.10 g with a thickness of 1 mm.

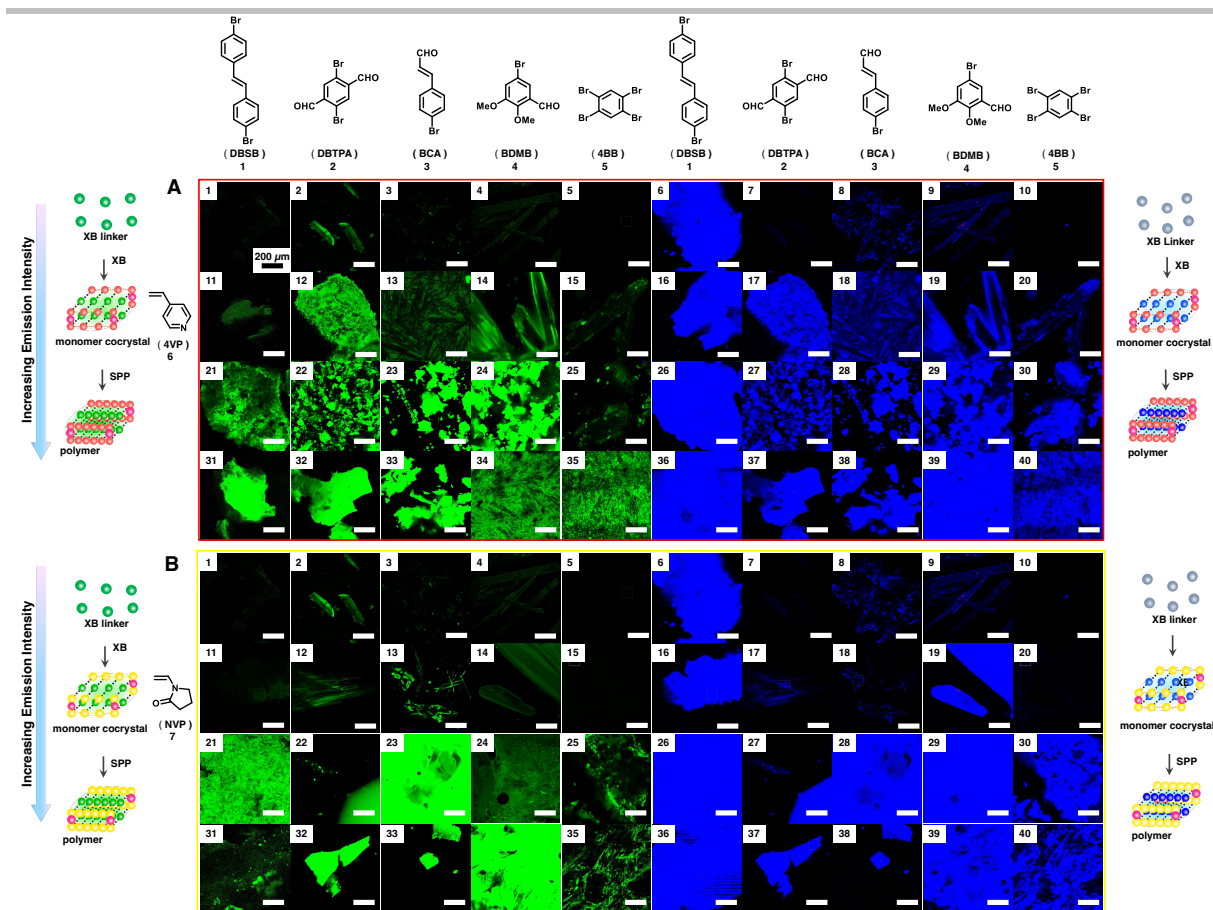

**Fig. S18.** CM images with  $\lambda_{\text{ex}} = 405$  nm and  $\lambda_{\text{ex}} = 488$  nm (Scale bar: 200  $\mu\text{m}$ ) and  $I_{405}$  and  $I_{488}$  values of (A) Pure linkers (1–5) (first row, images A1–A10), 4-component monomer cocrystal solids 1·6, 2·6, 3·6, 4·6, and 5·6 (second row, images A11–A20), 3-component non-covalently crosslinked polymers P(1·6), P(2·6), P(3·6), P(4·6), and P(5·6) (third row, images A21–A30), and 4-component covalently crosslinked polymers P(1·6), P(2·6), P(3·6), P(4·6), and P(5·6) (fourth row, images A31–A40). (B) Pure linkers (1–5) (first row, images B1–B10) (same as images A1–A10), 4-component monomer cocrystal solids 1·7, 2·7, 3·7, 4·7, and 5·7 (second row, images B11–B20), 3-component non-covalently crosslinked polymers P(1·7), P(2·7), P(3·7), P(4·7), and P(5·7) (third row, images B21–B30), and 4-component covalently crosslinked polymers P(1·7), P(2·7), P(3·7), P(4·7), and P(5·7) (fourth row, images B31–B40).



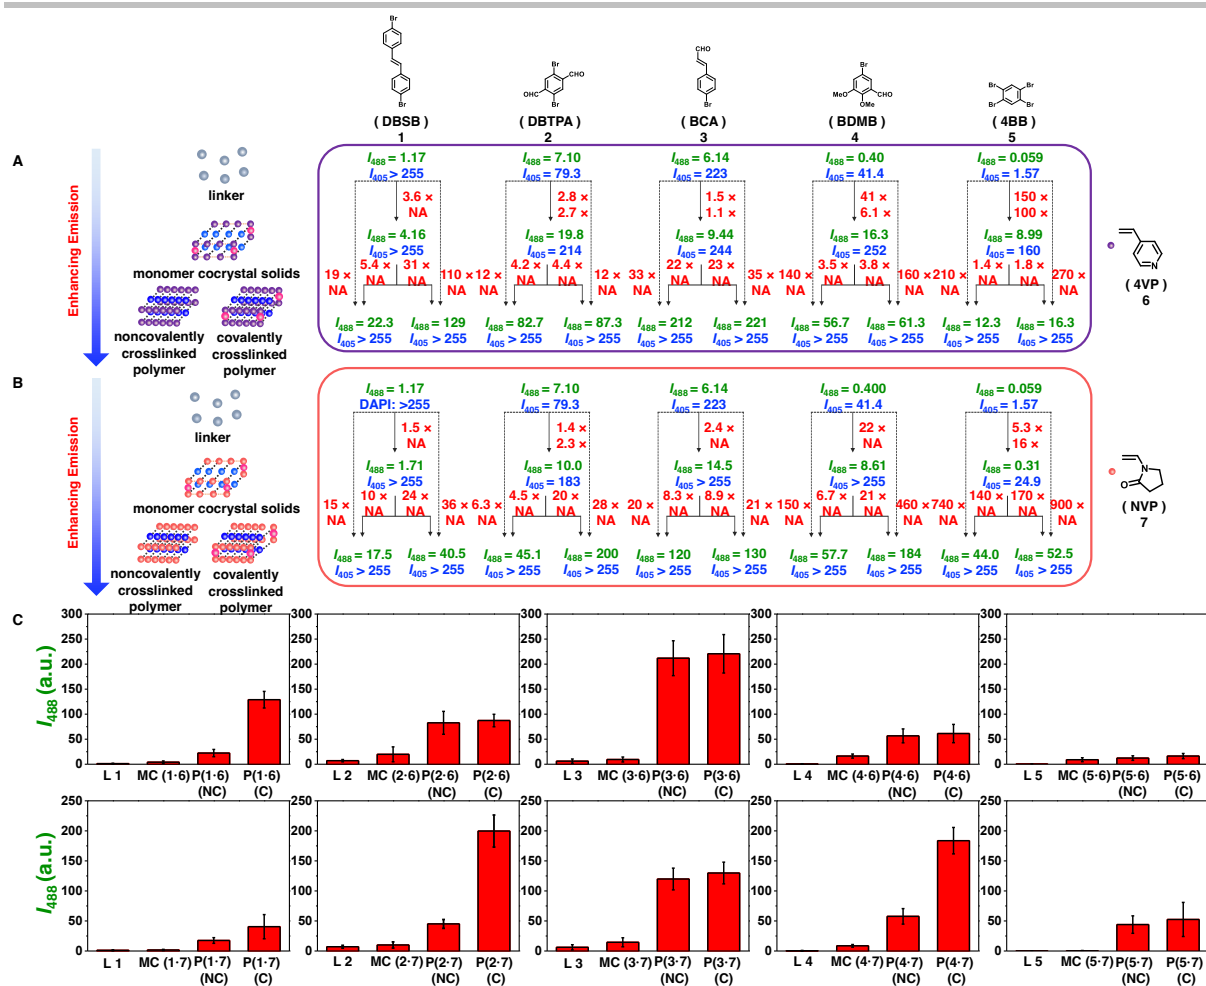

**Fig. S19.** Summary of Table S3. (A and B)  $I_{488}$  (green) and  $I_{405}$  (blue) values and emission enhancement ( $\times$ , red) of pure linkers (1–5) (first row), 4-component monomer cocrystal solids (second row), and 3-component non-covalently crosslinked polymers (left) and 4-component covalently crosslinked polymers (right) (third row) using (A) monomer 6 and (B) monomer 7. (C) Bar graphs of  $I_{488}$  values in (A) and (B) (L = linker, MC = monomer cocrystal solid, NC = non-crosslinked (3-component non-covalently crosslinked) polymer, and C = crosslinked (4-component covalently crosslinked) polymer).

## 8. Theoretical Calculations

All calculations were executed with Gaussian 09 (Revision A.02) program.<sup>2</sup> The input molecular structures data in three-dimension (3D with (x,y,z) axes) (cartesian coordinates) were obtained with Chem 3D (version) software. The B3LYP method with the 6-31G(d,p) basis set was utilized for structural optimization and vibrational frequency calculations. For polymer **P(5·6)** (Fig. 4E and S32), due to a large number of atoms, a model polymer **P(5·6)** structure was constructed at a linker/monomer ratio of  $\frac{1}{2}$ , where three linker molecules are linked to two short polymer chains with six monomer units.

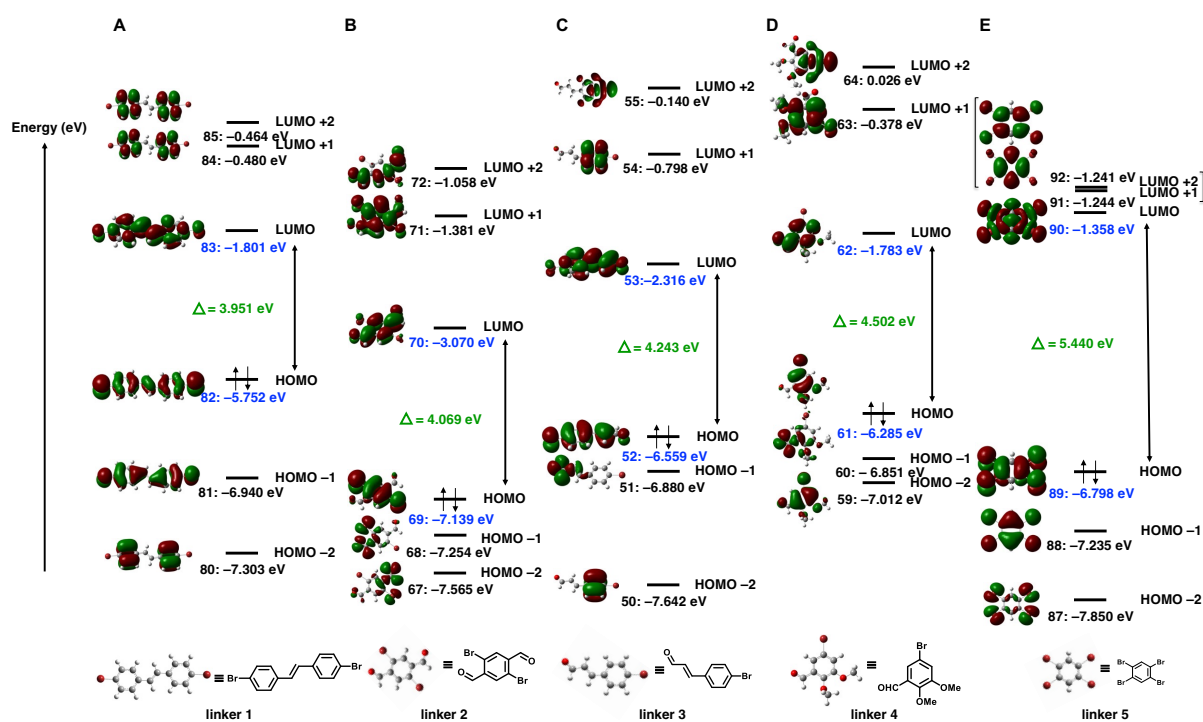

**Fig. S20.** DFT calculations of HOMO and LUMO for five pure linkers **1–5**, (A) pure linker **1**, (B) pure linker **2**, (C) pure linker **3**, (D) pure linker **4**, and (E) pure linker **5** using B3LYP/6-31G(d,p) level of theory. The HOMO-LUMO gap is given in green.

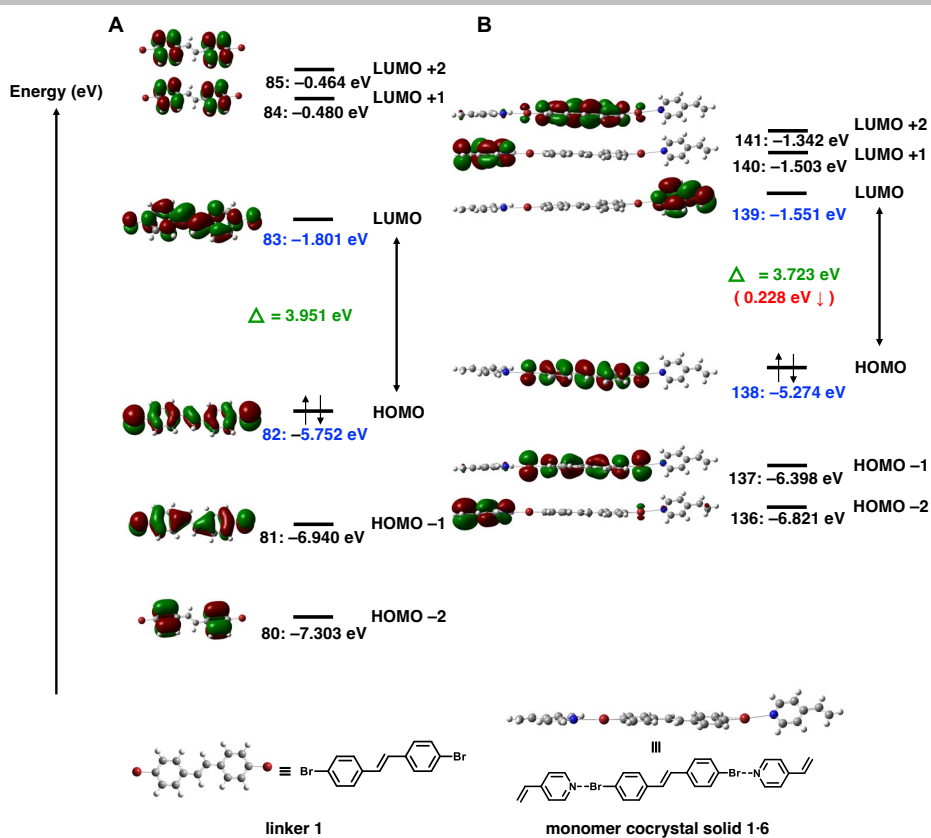

**Fig. S21.** DFT calculations of HOMO and LUMO for (A) pure linker **1** and (B) monomer cocrystal solid **1·6** at the linker/monomer ratio of  $\frac{1}{2}$  using B3LYP/6-31G(d,p) level of theory. The HOMO-LUMO gap is given in green. The decrease in the HOMO-LUMO gap from (A) to (B) is given in red.

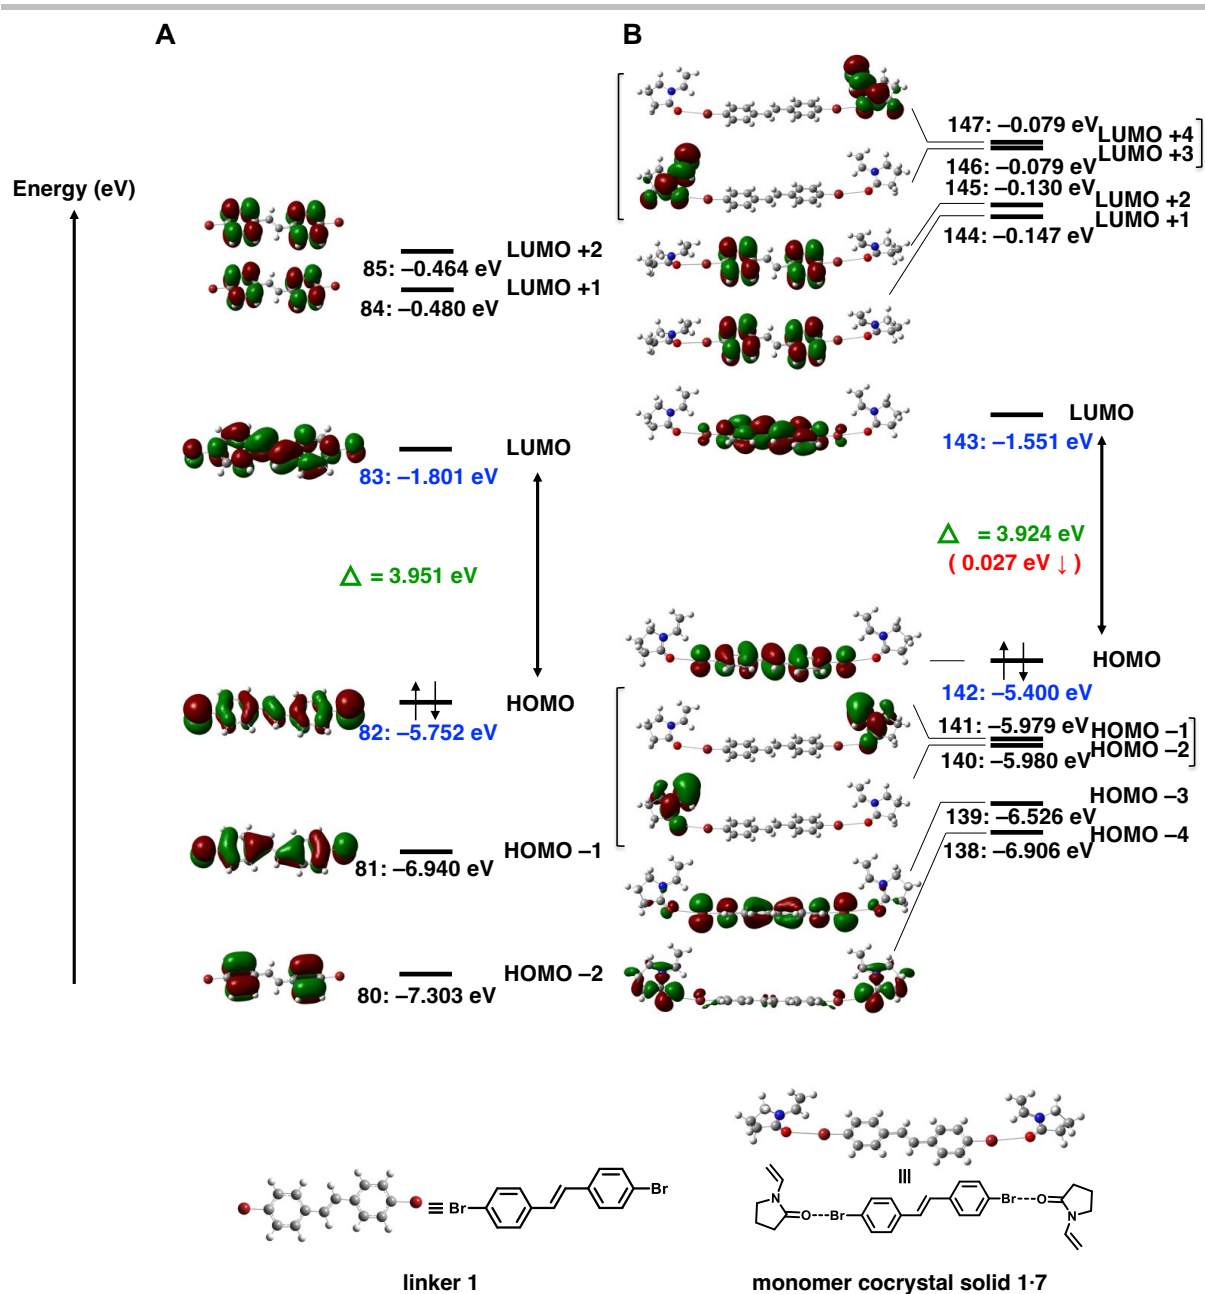

**Fig. S22.** DFT calculations of HOMO and LUMO for (A) pure linker 1 and (B) monomer cocrystal solid 1·7 at the linker/monomer ratio of  $\frac{1}{2}$  using B3LYP/6-31G(d,p) level of theory. The HOMO-LUMO gap is given in green. The decrease in the HOMO-LUMO gap from (A) to (B) is given in red.

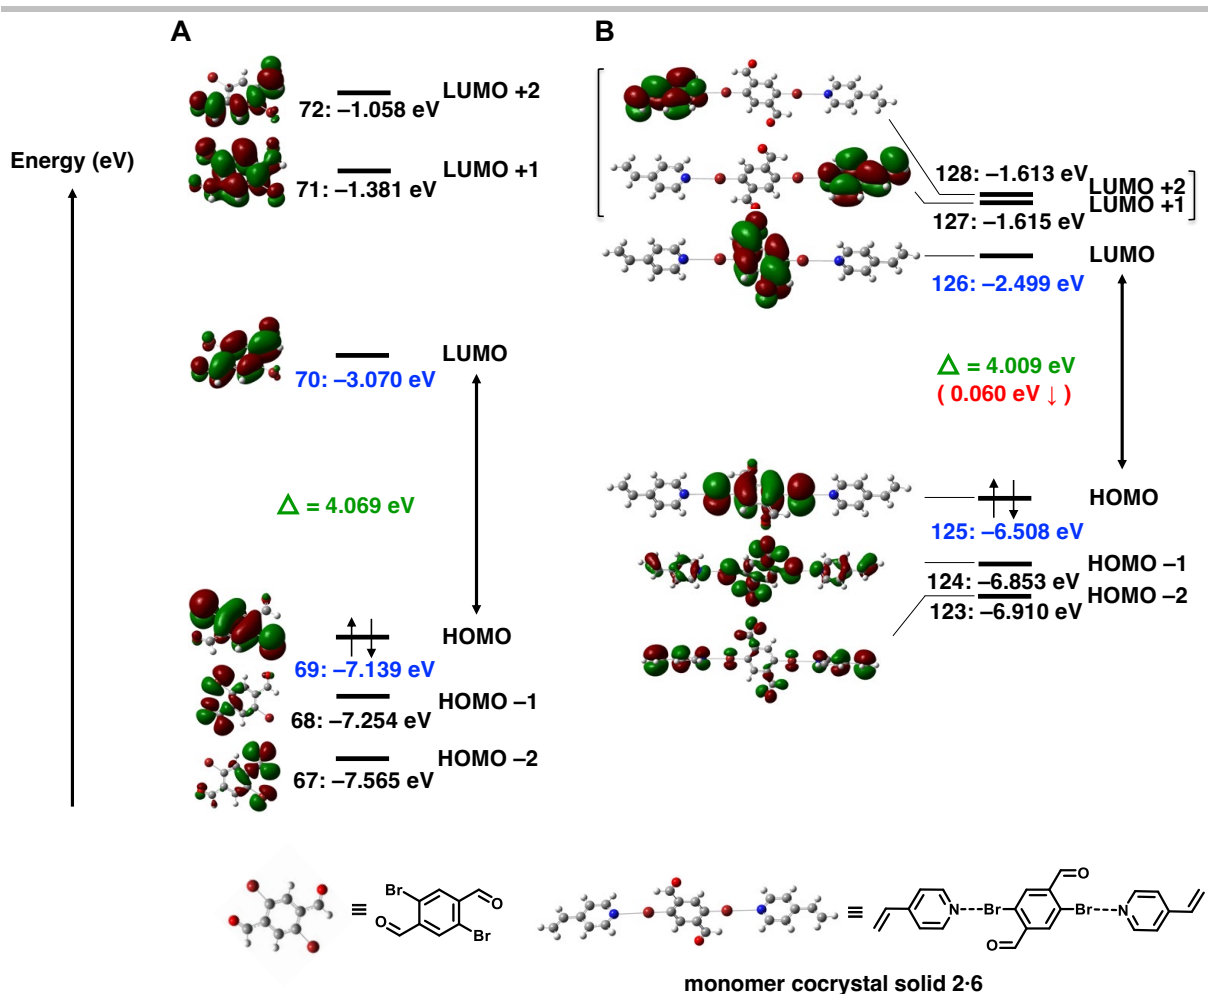

**Fig. S23.** DFT calculations of HOMO and LUMO for (A) pure linker **2** and (B) monomer cocrystal solid **2·6** at the linker/monomer ratio of  $\frac{1}{2}$  using B3LYP/6-31G(d,p) level of theory. The HOMO-LUMO gap is given in green. The decrease in the HOMO-LUMO gap from (A) to (B) is given in red.

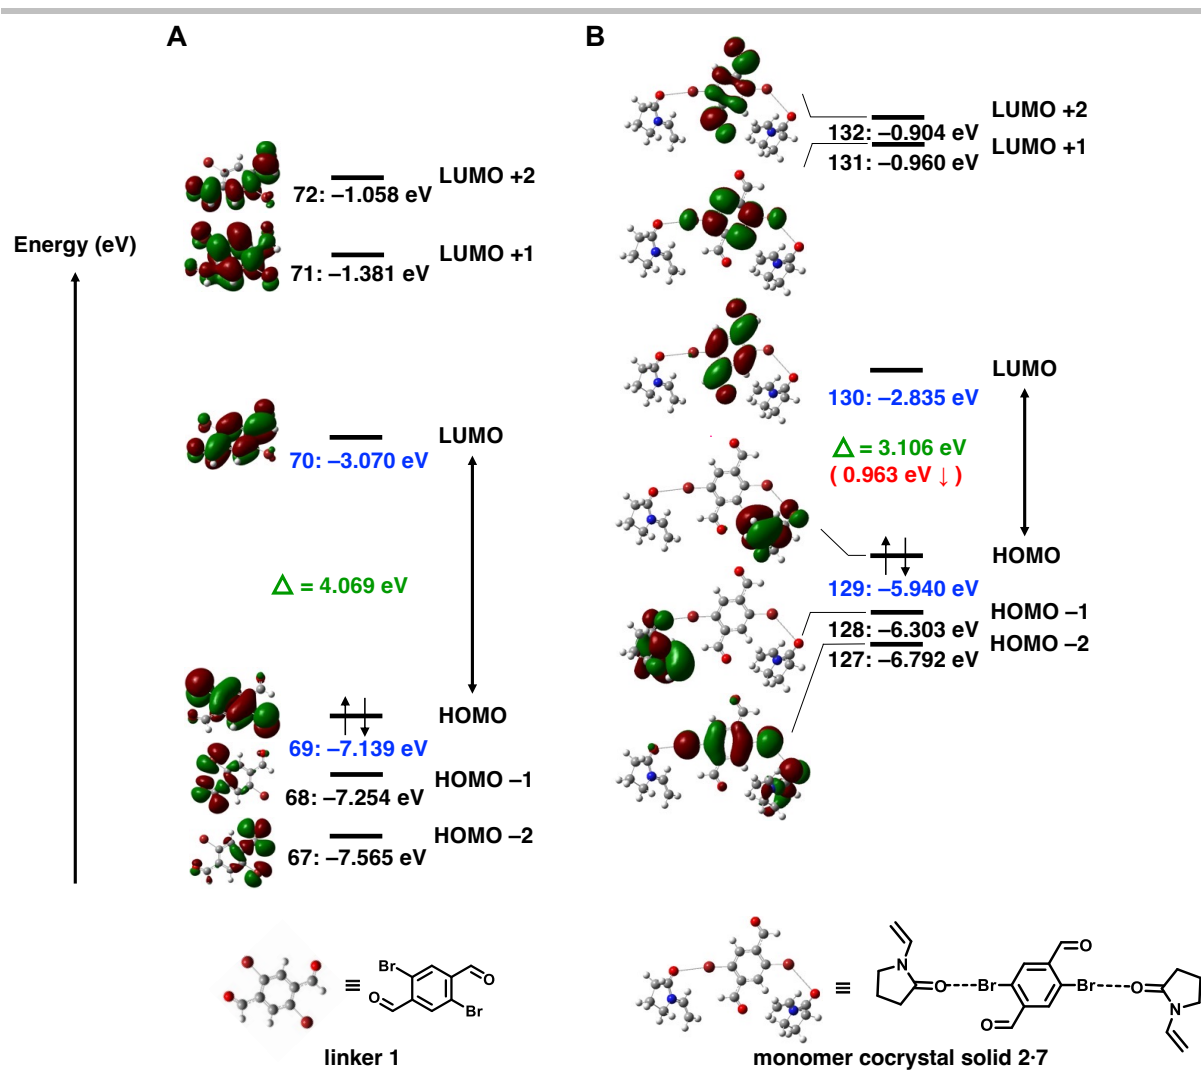

**Fig. S24.** DFT calculations of HOMO and LUMO for (A) pure linker 2 and (B) monomer cocrystal solid 2·7 at the linker/monomer ratio of  $\frac{1}{2}$  using B3LYP/6-31G(d,p) level of theory. The HOMO-LUMO gap is given in green. The decrease in the HOMO-LUMO gap from (A) to (B) is given in red.

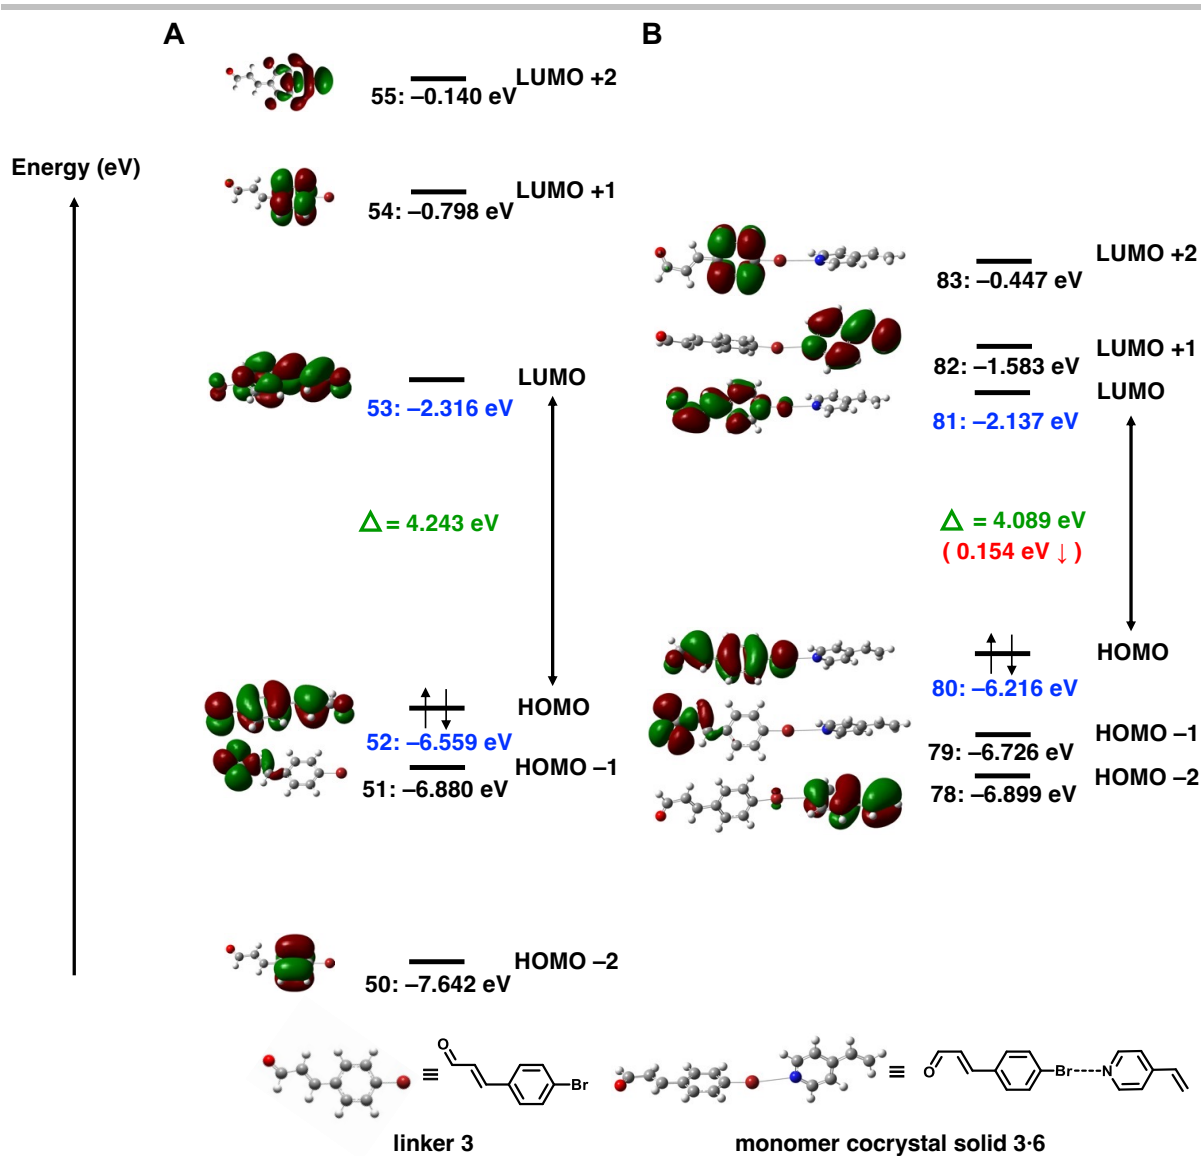

**Fig. S25.** DFT calculations of HOMO and LUMO for (A) pure linker **3** and (B) monomer cocrystal solid **3·6** at the linker/monomer ratio of 1/1 using B3LYP/6-31G(d,p) level of theory. The HOMO-LUMO gap is given in green. The decrease in the HOMO-LUMO gap from (A) to (B) is given in red.

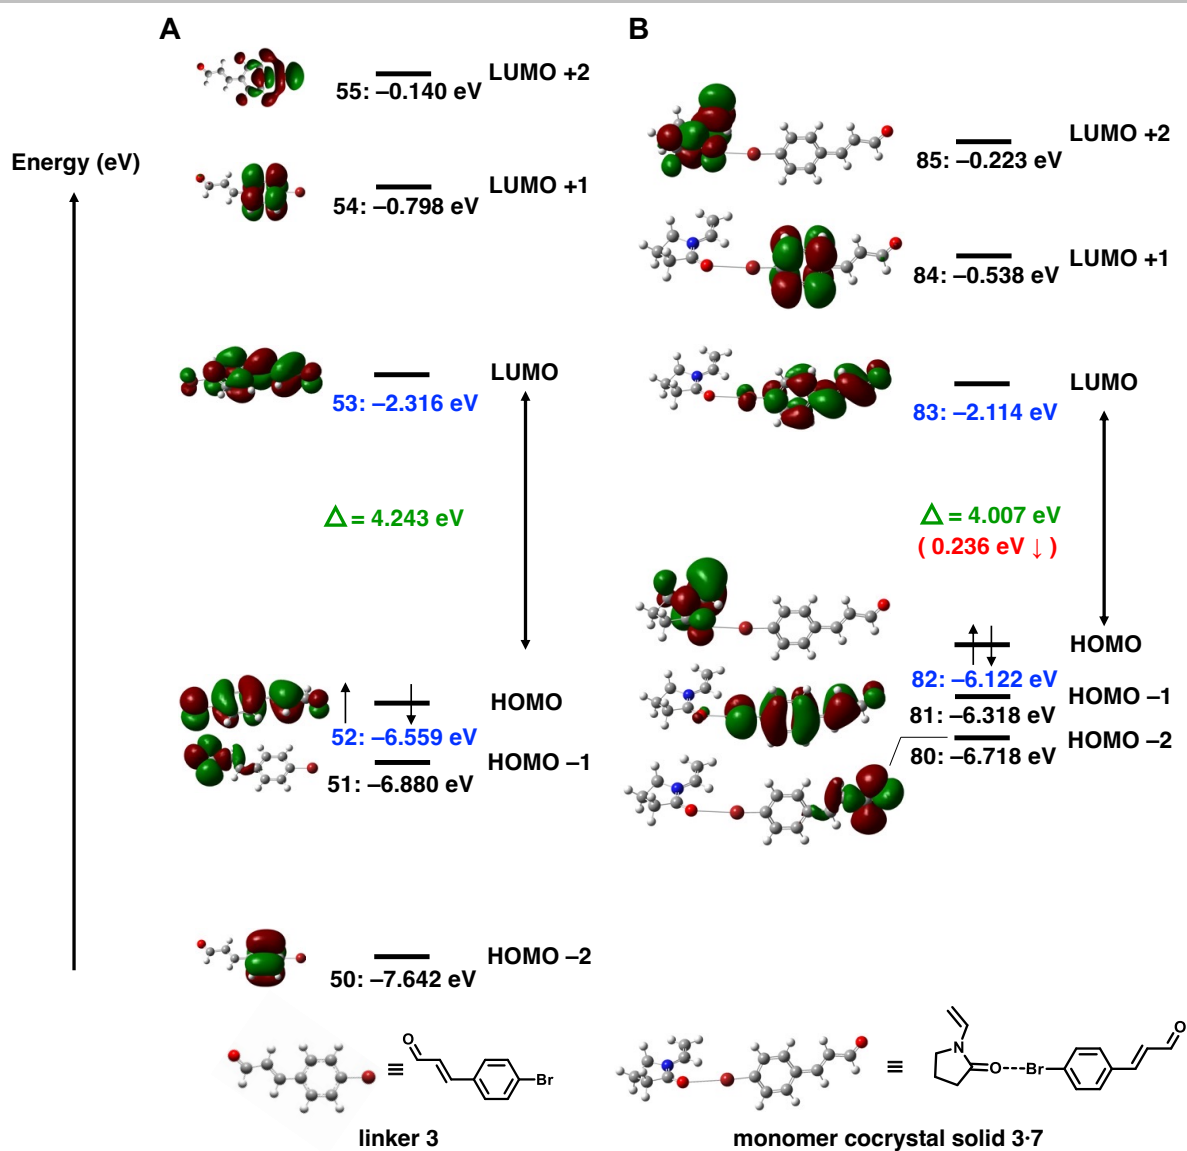

**Fig. S26.** DFT calculations of HOMO and LUMO for (A) pure linker **3** and (B) monomer cocrystal solid **3·7** at the linker/monomer ratio of 1/1 using B3LYP/6-31G(d,p) level of theory. The HOMO-LUMO gap is given in green. The decrease in the HOMO-LUMO gap from (A) to (B) is given in red.



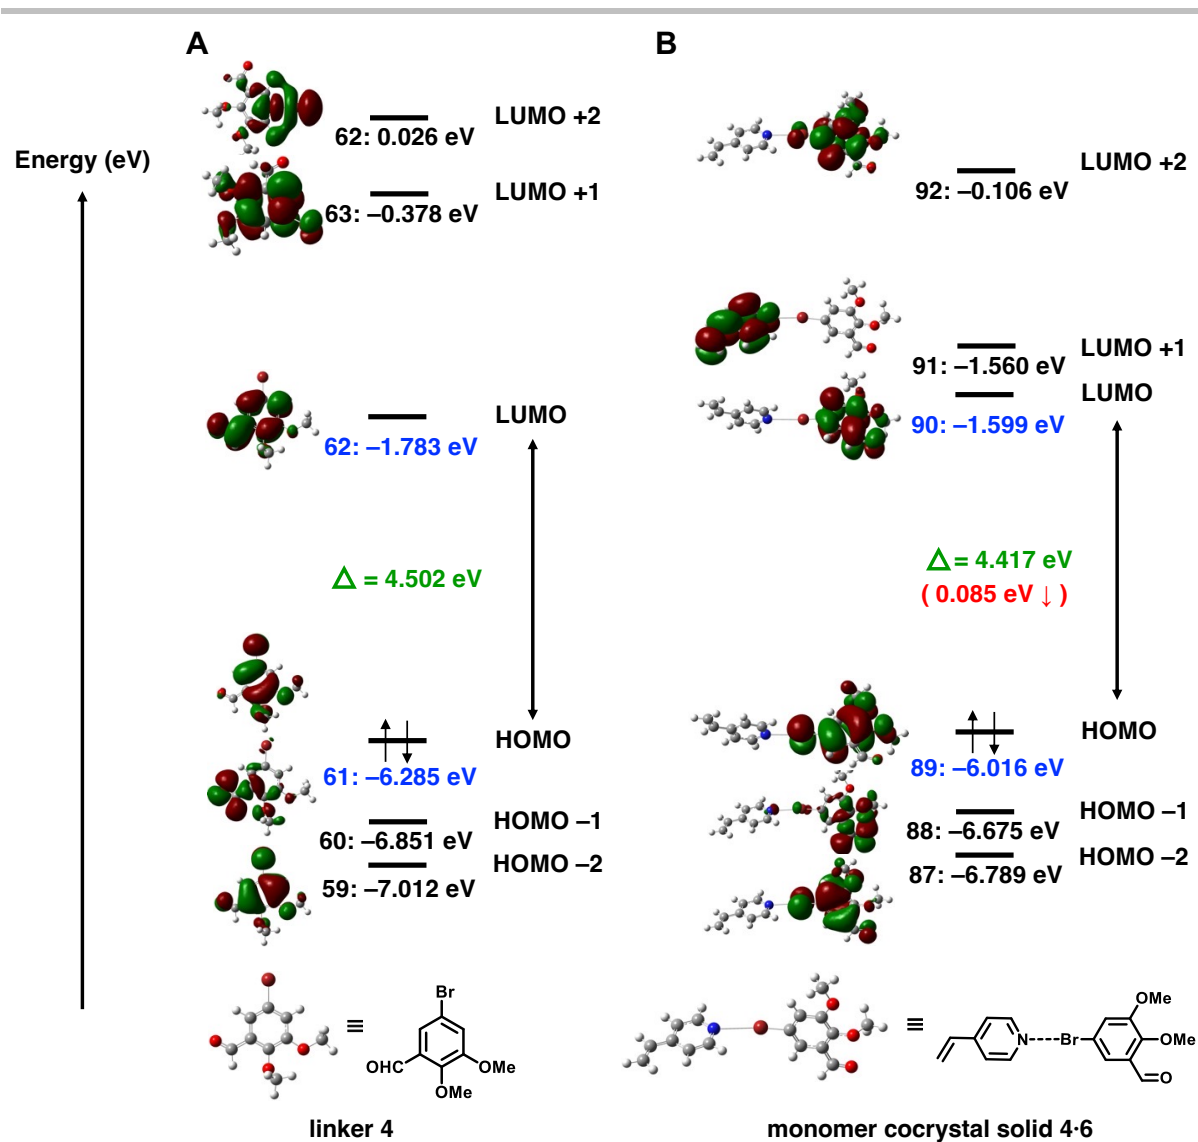

**Fig. S27.** DFT calculations of HOMO and LUMO for (A) pure linker 4 and (B) monomer cocrystal solid 4·6 at the linker/monomer ratio of 1/1 using B3LYP/6-31G(d,p) level of theory. The HOMO-LUMO gap is given in green. The decrease in the HOMO-LUMO gap from (A) to (B) is given in red.

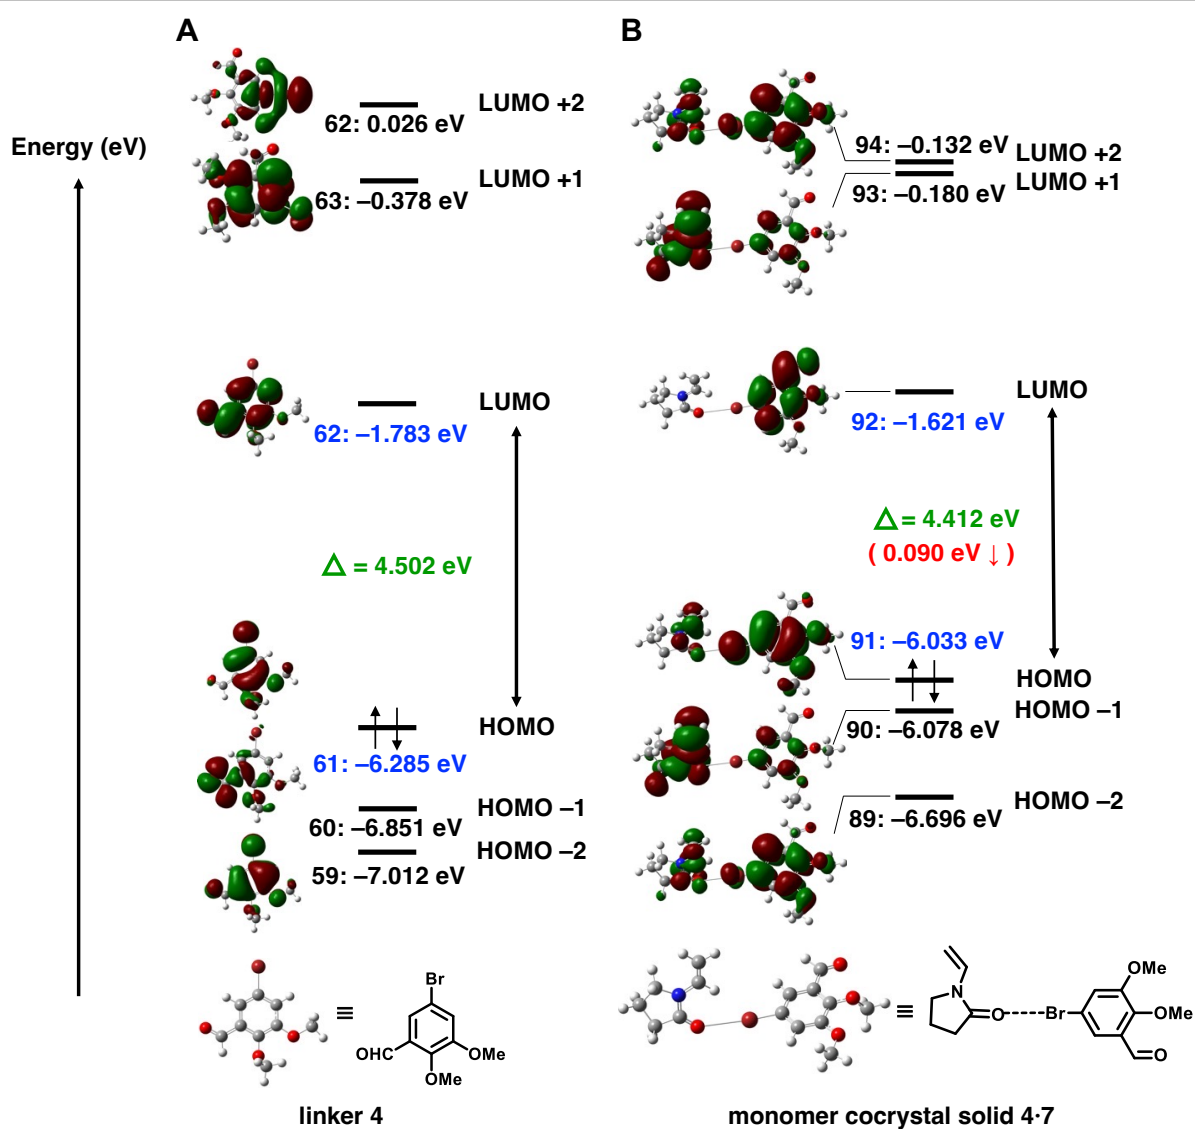

**Fig. S28.** DFT calculations of HOMO and LUMO for (A) pure linker 4 and (B) monomer cocrystal solid 4·7 at the linker/monomer ratio of 1/1 using B3LYP/6-31G(d,p) level of theory. The HOMO-LUMO gap is given in green. The decrease in the HOMO-LUMO gap from (A) to (B) is given in red.

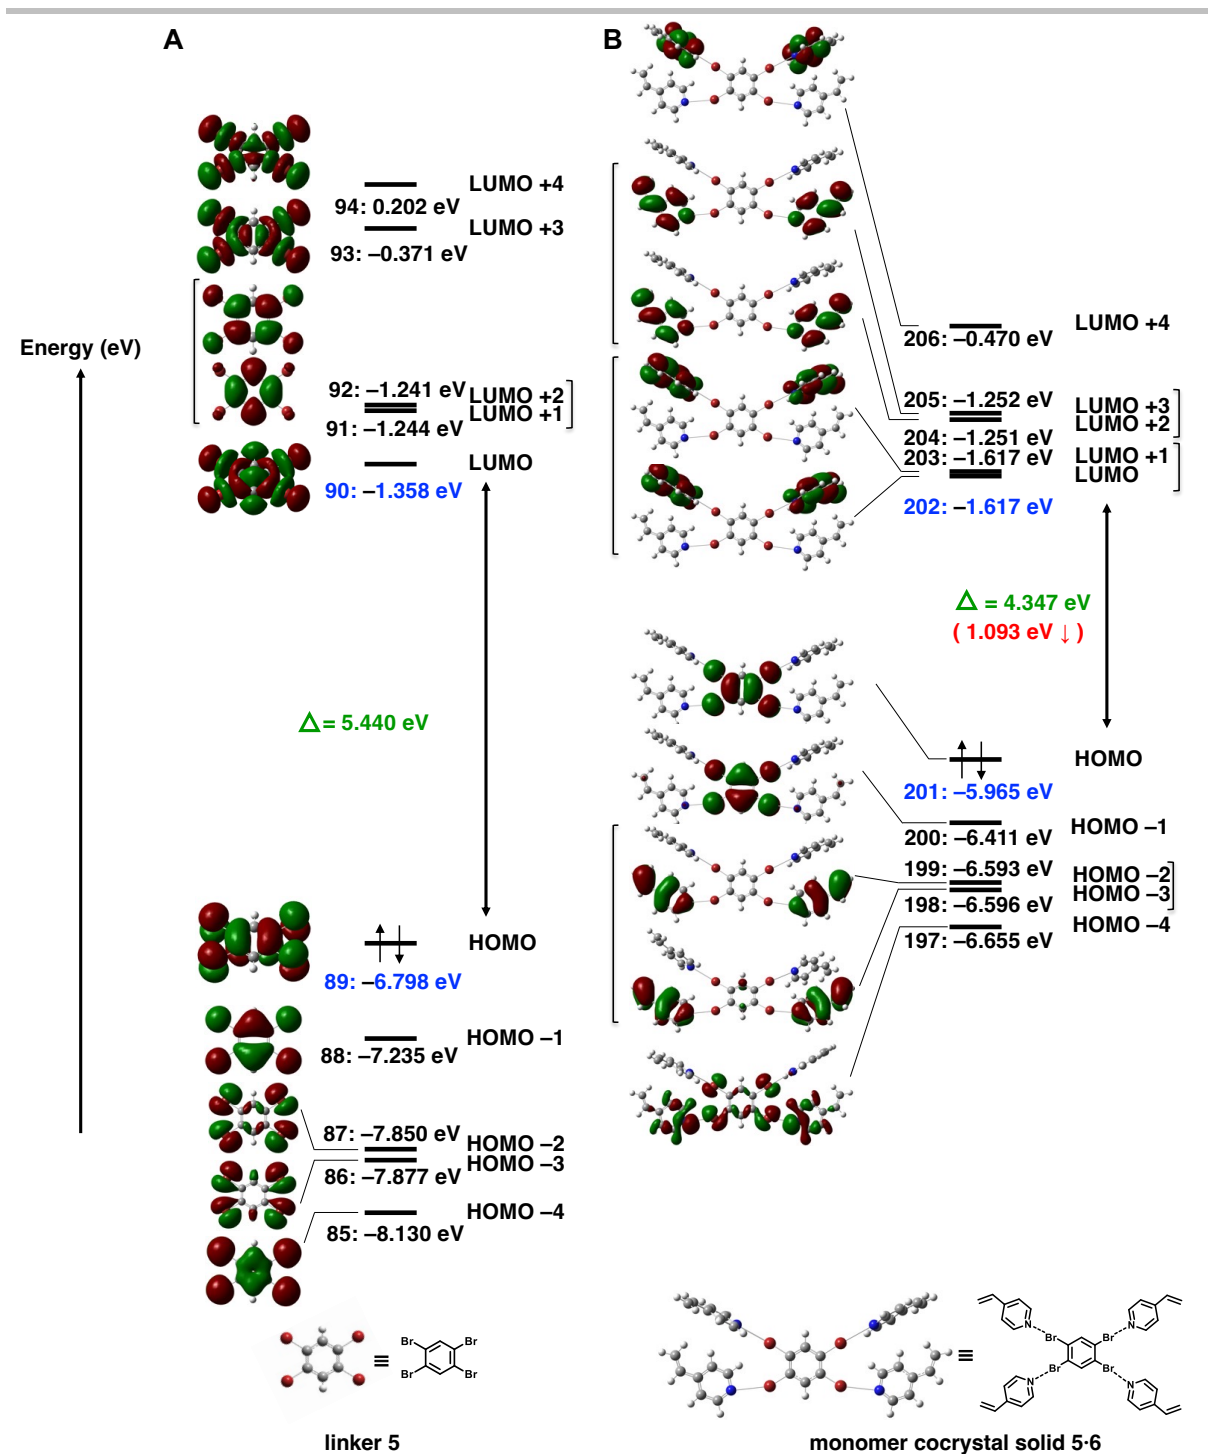

**Fig. S29.** DFT calculations of HOMO and LUMO for (A) pure linker **5** and (B) monomer cocrystal solid **5·6** at the linker/monomer ratio of  $\frac{1}{4}$  using B3LYP/6-31G(d,p) level of theory. The HOMO-LUMO gap is given in green. The decrease in the HOMO-LUMO gap from (A) to (B) is given in red.

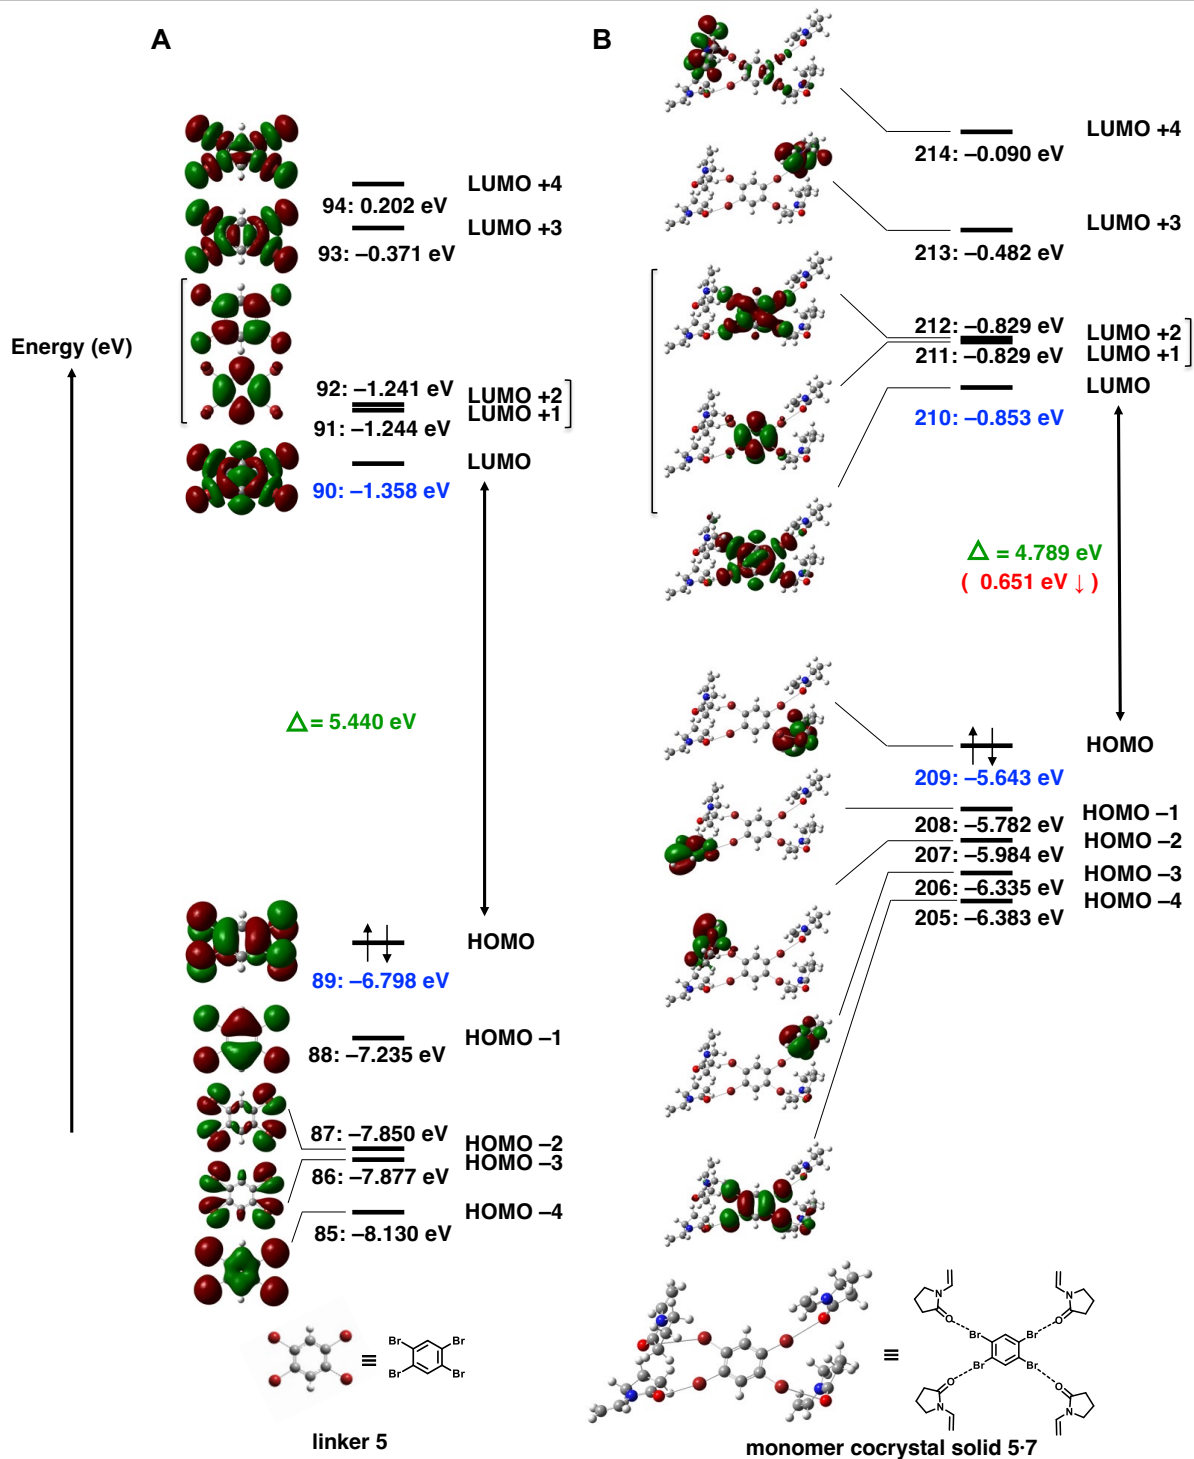

**Fig. S30.** DFT calculations of HOMO and LUMO for (A) pure linker **5** and (B) monomer cocrystal solid **5·7** at the linker/monomer ratio of  $\frac{1}{4}$  using B3LYP/6-31G(d,p) level of theory. The HOMO-LUMO gap is given in green. The decrease in the HOMO-LUMO gap from (A) to (B) is given in red.

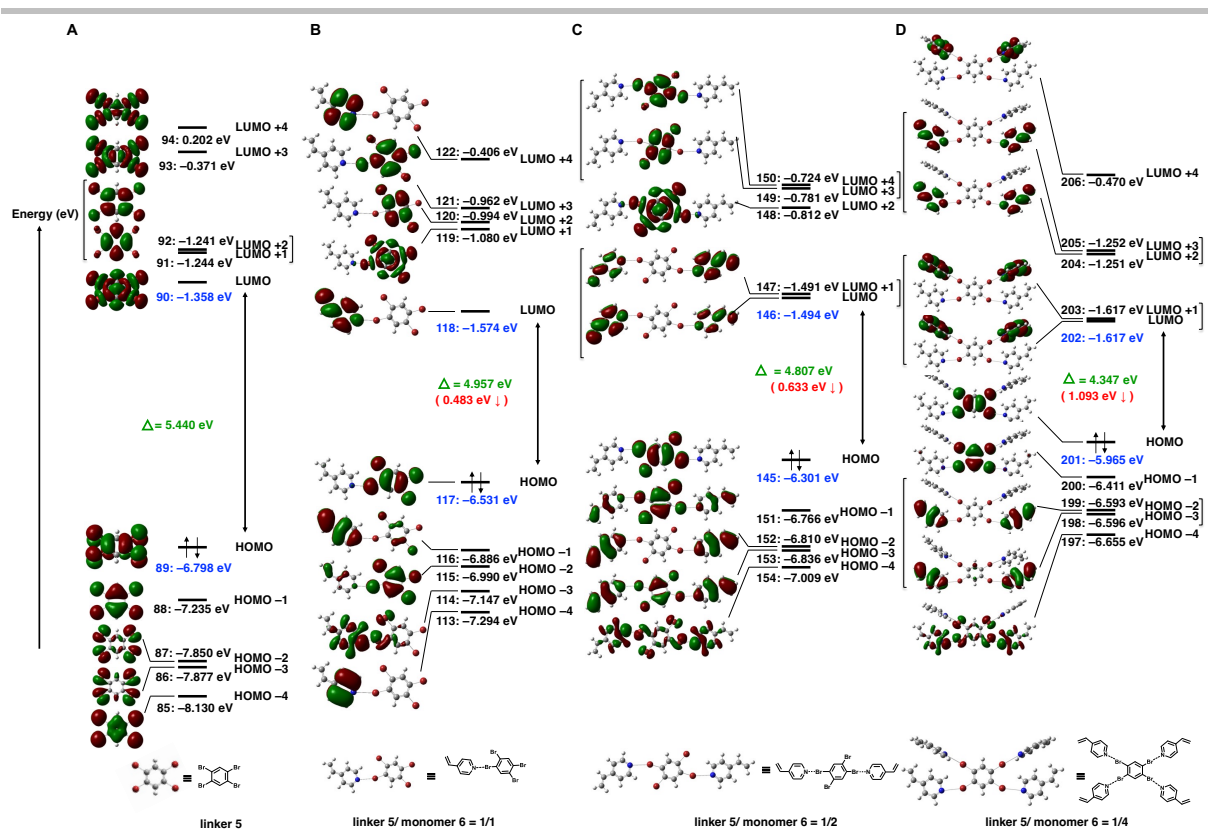

**Fig. S31.** DFT calculations of HOMO and LUMO for (A) pure linker **5**, and monomer cocrystals **5·6** at the linker/monomer ratios of (B) 1/1, (C) 1/2, and (D) 1/4 using B3LYP/6-31G(d,p) level of theory. The HOMO-LUMO gap is given in green. The decrease in the HOMO-LUMO gap from (A) to (B-D) is given in red (details of Figs. 4A-4D).

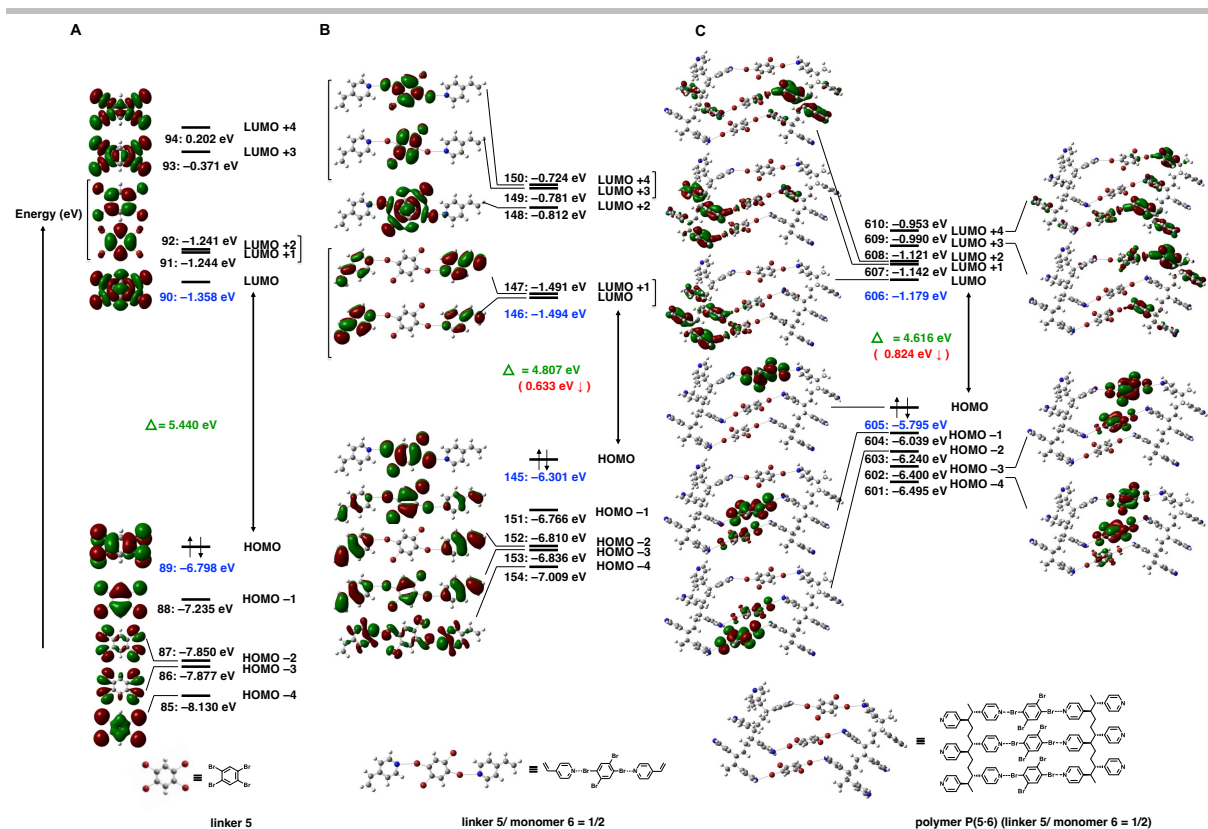

**Fig. S32.** DFT calculations of HOMO and LUMO for (A) pure linker **5**, (B) monomer cocrystals **5·6** at the linker/monomer ratio of  $\frac{1}{2}$ , and (C) model polymer **P(5·6)** at the linker/monomer ratio of  $\frac{1}{2}$ , using B3LYP/6–31G(d,p) level of theory. The HOMO-LUMO gap is given in green. The decrease in the HOMO-LUMO gap from (A) to (B and C) is given in red (details of Figs. 4A, 4C, and 4E).

## 9. Patterned Emissive Polymer Sheet

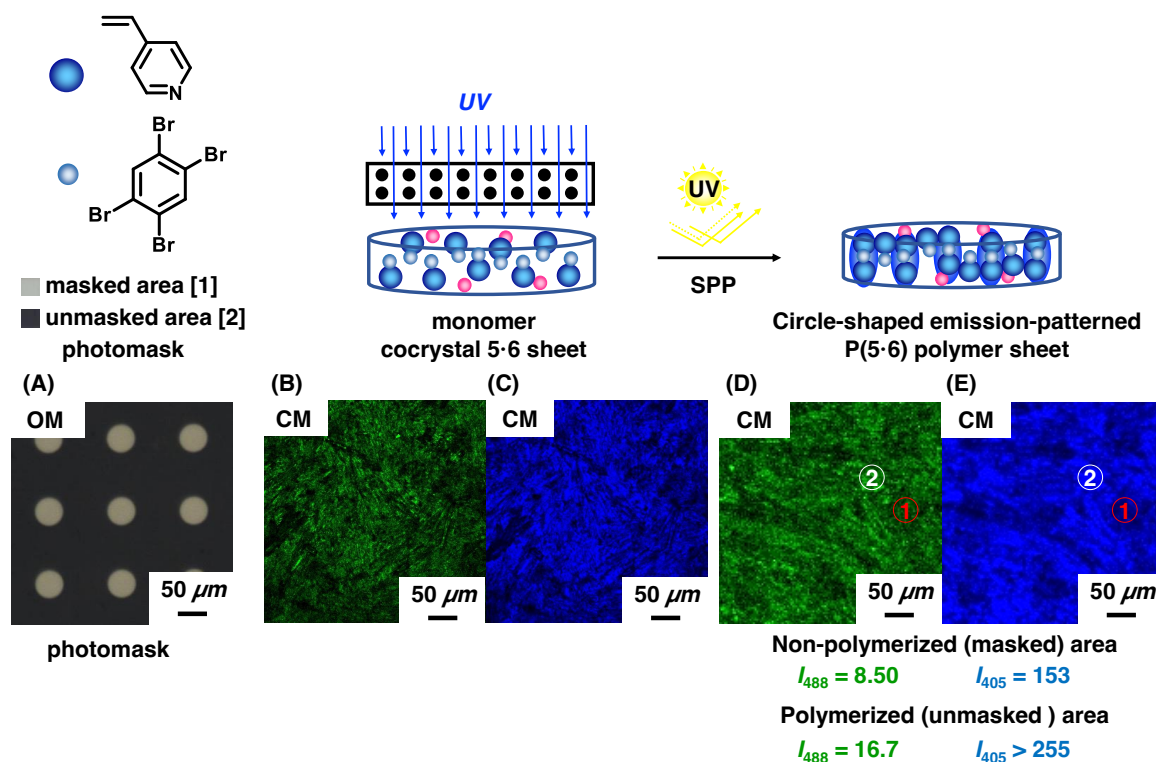

**Fig. S33.** Schematic illustrations of the preparation of emission-patterned polymer sheet, (A) OM image of photomask circle 50, CM images with (B)  $\lambda_{ex} = 488$  nm and (C)  $\lambda_{ex} = 405$  nm of monomer cocystal (5·6) (before SPP), CM images with (D)  $\lambda_{ex} = 488$  nm and (E)  $\lambda_{ex} = 405$  nm of polymer sheet P(5·6) (after SPP).

## 10. Thermal Stability

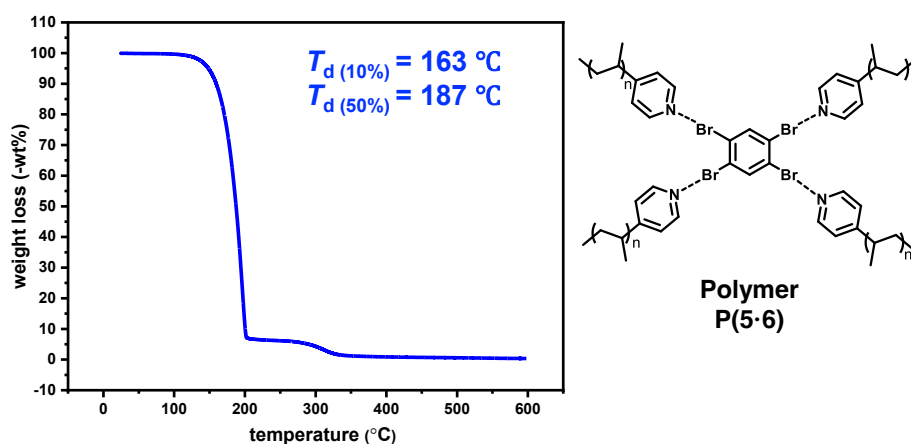

**Fig. S34.** TGA curve of the 4-component covalently crosslinked polymer sheet P(5·6) ( $T_{d(10\%)} = 163$  °C and  $T_{d(50\%)} = 187$  °C).

## 11. Emission of P4VP synthesized via solution phase radical polymerization

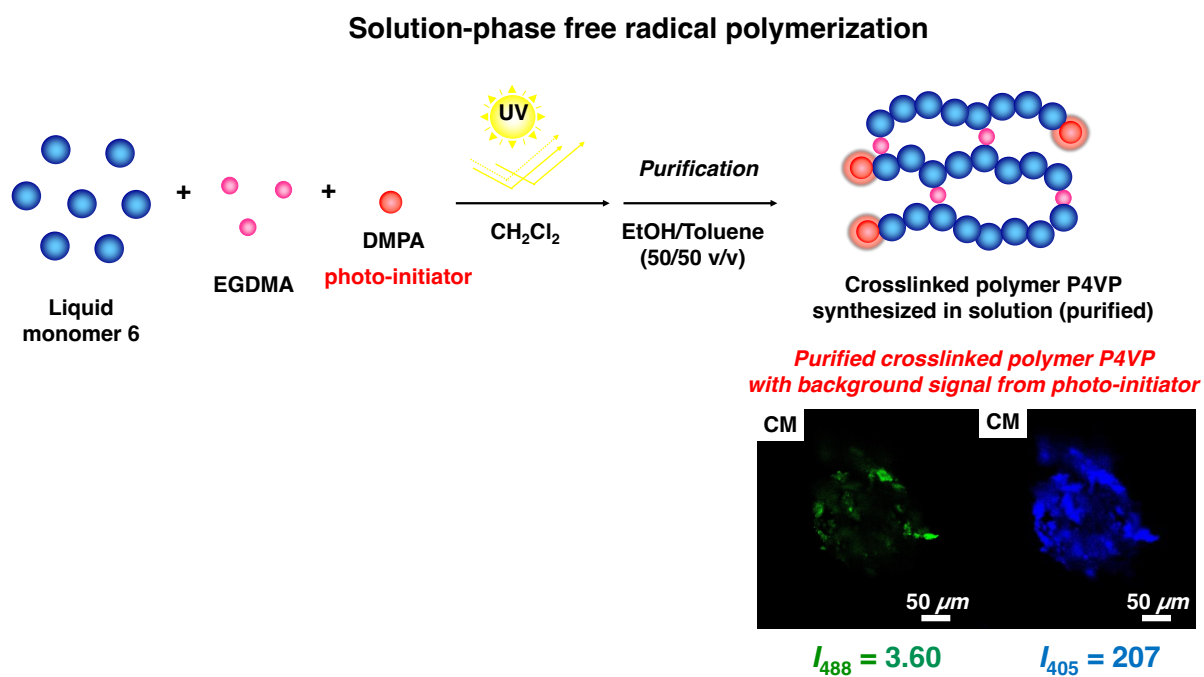

**Fig. S35.** Schematic illustration of the purified crosslinked polymer P4VP synthesized via solution-phase free radical polymerization of liquid monomer 6, EGDMA, and DMPA (photo-initiator) and CM images of the purified crosslinked polymer P4VP with  $\lambda_{\text{ex}} = 488$  nm (left) and  $\lambda_{\text{ex}} = 405$  nm (right).



## 12. Cartesian Coordinates

Atom      Coordinates (Angstroms)  
X          Y          Z

XB linker 4 (BDMB)

XB linker 1 (DBSb)

C      -1.802099    3.735112    -0.040949  
C      -1.721630    2.414640    -0.280432  
C      -0.548295    1.760896    -0.357382  
C      0.569874    2.488793    -0.251228  
C      0.512810    3.837275    -0.074332  
C      -0.645794    4.482055    0.039515  
C      -0.576068    0.416448    -0.420522  
C      0.463939    -0.392412    -0.371290  
C      0.481648    -1.763005    -0.241725  
C      1.701655    -2.383520    -0.184624  
C      1.741391    -3.738775    -0.048322  
C      0.577873    -4.468624    0.156101  
C      -0.594146    -3.861977    0.051101  
C      -0.649670    -2.514752    -0.130138  
Br      -0.699621    6.349754    0.164494  
Br      0.776830    -6.352709    0.188096  
H      -2.826442    4.147591    0.061638  
H      -2.670391    1.922072    -0.366785  
H      1.616601    2.122120    -0.210237  
H      1.526053    4.304540    -0.305688  
H      -1.587881    -0.100908    -0.504937  
H      1.459183    0.090092    -0.308575  
H      2.687812    -1.785924    -0.253508  
H      2.752128    -4.134657    -0.028836  
H      -1.527767    -4.424049    0.197401  
H      -1.656940    -2.054192    -0.239781

XB linker 2 (DBTPA)

C      -1.160975    0.712222    -0.041328  
C      -1.101314    -0.609582    0.051723  
C      0.126014    -1.220204    0.022021  
C      1.307374    -0.594911    0.007259  
C      1.191068    0.765773    -0.056224  
C      -0.005471    1.432212    -0.069796  
Br      2.547601    1.924542    0.036426  
C      2.463665    -1.353752    0.025050  
C      -2.388710    1.330052    -0.095704  
Br      -2.625700    -1.834213    0.042164  
O      -2.518099    2.563956    -0.111145  
O      3.560051    -0.914703    -0.104386  
H      0.145589    -2.371257    -0.053747  
H      0.019638    2.551562    -0.087185  
H      2.378193    -2.454633    0.071486  
H      -3.383533    0.726844    -0.185936

XB linker 3 (BCA)

C      -4.383913    1.889593    -0.587498  
C      -4.004489    0.736218    -0.005746  
C      -4.882298    -0.229304    0.346719  
C      -6.169925    -0.040865    0.000333  
C      -6.647801    1.122383    -0.427424  
C      -5.677516    2.021980    -0.866289  
Br      -3.210081    3.367142    -0.876992  
C      -6.984171    -1.076878    0.300351  
C      -8.288729    -1.183613    0.203631  
C      -8.936021    -2.298295    0.669835  
O      -10.123818    -2.554171    0.644023  
H      -2.952193    0.595461    0.262512  
H      -4.534319    -1.125079    0.939066  
H      -7.675484    1.416758    -0.472700  
H      -5.970913    2.977708    -1.234431  
H      -6.495483    -1.853732    0.817369  
H      -8.911959    -0.401083    -0.195418  
H      -8.197415    -3.042343    1.099776

O      0.699114    -1.906154    0.099625  
C      0.628303    -0.471118    0.142164  
C      1.786542    0.226671    0.314789  
C      1.874369    1.544682    0.239509  
C      0.755199    2.203403    0.028503  
C      -0.452445    1.620411    -0.108723  
C      -0.534596    0.237946    0.045373  
Br      0.824559    4.025759    -0.108421  
C      2.978404    -0.382341    0.507374  
O      -1.782581    -0.387896    -0.179776  
O      4.104766    0.099822    0.635578  
C      -0.357220    -2.711255    -0.437955  
C      -2.885525    0.358970    -0.617721  
H      2.753053    2.108813    0.409169  
H      -1.358059    2.206937    -0.109019  
H      2.970896    -1.430521    0.515394  
H      -1.215505    -2.724889    0.272781  
H      -0.456471    -2.400025    -1.512353  
H      -0.022905    -3.829805    -0.461440  
H      -3.294678    1.132626    0.083890  
H      -2.636449    0.877268    -1.555822  
H      -3.711406    -0.397227    -0.704168

XB linker 5 (4BB)

C      1.080780    0.692801    0.132796  
C      1.199529    -0.656870    0.206968  
C      0.099212    -1.391775    0.007259  
C      -1.091756    -0.737341    0.009447  
C      -1.226708    0.577753    0.115441  
C      -0.116829    1.284021    0.192887  
Br      -2.850049    1.728689    -0.060766  
Br      -2.569209    -1.906064    0.009928  
Br      2.569256    1.845459    -0.014187  
Br      2.862169    -1.626178    -0.051454  
H      0.082621    -2.467331    -0.122824  
H      -0.173848    2.389135    0.210763

Monomer solid I□6 (DBSb□4VP)

C      -4.207508    -2.774238    -2.840501  
C      -2.925707    -3.024036    -3.235655  
C      -1.605990    -2.811948    -3.126734  
C      -1.202284    -2.028732    -2.137902  
C      -2.333434    -1.488848    -1.671334  
C      -3.615201    -1.874312    -1.993778  
C      0.079711    -1.649963    -1.827279  
C      0.605584    -0.809590    -0.840435  
C      1.866506    -0.497420    -0.651806  
C      2.170358    0.354158    0.329661  
C      3.425937    0.736471    0.490880  
C      4.440104    0.390062    -0.272142  
C      4.194350    -0.419865    -1.309236  
C      2.869454    -0.787442    -1.493781  
Br      6.324024    0.816371    0.305261  
Br      -5.854496    -2.146578    -2.002149  
C      -9.886598    -0.527459    -0.714581  
C      -8.888672    0.353640    -0.912720  
C      -7.696701    -0.181520    -1.248228  
N      -7.437118    -1.464465    -1.388307  
C      -8.458375    -2.277721    -1.303362  
C      -9.692465    -1.876751    -0.997828  
C      -11.093338    -0.010906    -0.409736  
C      -12.230119    -0.663628    -0.309867  
C      9.019357    2.537969    3.533694  
C      7.769428    2.382332    3.240390  
C      7.394268    1.910361    2.023290  
N      7.961050    1.300571    0.874265  
C      9.051720    1.759541    1.416932  
C      9.733737    2.264166    2.445601  
C      9.493299    3.079767    4.681546  
C      10.767821    3.337282    5.052596  
H      -3.148629    -3.787678    -4.024804  
H      -0.850554    -3.241257    -3.772351  
H      -2.121480    -0.713790    -0.887993



|   |           |           |           |   |           |           |           |
|---|-----------|-----------|-----------|---|-----------|-----------|-----------|
| H | -0.476308 | 2.107226  | -2.016900 | H | -2.868301 | -1.212322 | -2.158839 |
| H | 0.741638  | 3.074068  | -1.064283 | H | -4.824122 | 0.117432  | -2.517223 |
| H | -2.005847 | 2.737020  | 1.431759  | H | -5.384712 | -0.074636 | -0.749064 |
| H | -0.269898 | 1.208509  | 2.033549  |   |           |           |           |
| H | 0.601662  | 1.417265  | 0.398183  |   |           |           |           |
| H | -8.837195 | -2.264179 | 2.667587  |   |           |           |           |
| H | -9.776625 | -3.821452 | 2.529452  |   |           |           |           |
| H | -7.992943 | -5.105414 | 3.492824  |   |           |           |           |
| H | -7.706584 | -3.567858 | 4.409044  |   |           |           |           |
| H | -5.957237 | -2.880707 | 2.853801  |   |           |           |           |
| H | -5.767823 | -4.693556 | 2.841225  |   |           |           |           |
| H | -6.407656 | -4.024456 | -0.767991 |   |           |           |           |
| H | -4.069058 | -4.438772 | -0.495728 |   |           |           |           |
| H | -4.171034 | -4.299067 | 1.360887  |   |           |           |           |

Monomer solid 3□6 (BCA□4VP)

|    |           |           |           |
|----|-----------|-----------|-----------|
| C  | -6.322047 | -4.301609 | -0.650895 |
| C  | -6.808778 | -3.663140 | 0.426935  |
| N  | -8.005961 | -3.122108 | 0.468602  |
| C  | -8.768673 | -3.514080 | -0.464702 |
| C  | -8.382870 | -4.199334 | -1.578875 |
| C  | -7.105362 | -4.541059 | -1.710362 |
| C  | -6.617998 | -5.226205 | -2.737462 |
| C  | -7.226442 | -5.395356 | -3.936880 |
| C  | -7.167175 | 0.590310  | 0.772675  |
| C  | -7.264582 | 1.114092  | 1.984079  |
| C  | -6.836301 | 2.395989  | 2.217817  |
| C  | -6.342769 | 3.233295  | 1.273333  |
| C  | -6.260833 | 2.644154  | 0.043297  |
| C  | -6.653745 | 1.376050  | -0.161322 |
| Br | -7.656800 | -1.296021 | 0.367565  |
| C  | -5.906386 | 4.446804  | 1.579898  |
| C  | -5.325283 | 5.342076  | 0.777148  |
| C  | -4.864876 | 6.602283  | 1.008133  |
| O  | -4.861457 | 7.243085  | 2.043410  |
| H  | -5.243132 | -4.684686 | -0.674500 |
| H  | -6.170608 | -3.619304 | 1.266719  |
| H  | -9.872996 | -3.402101 | -0.235144 |
| H  | -9.219207 | -4.393056 | -2.242439 |
| H  | -5.604211 | -5.634741 | -2.783535 |
| H  | -6.673890 | -5.877077 | -4.754615 |
| H  | -8.405609 | -5.267916 | -4.070586 |
| H  | -7.714354 | 0.494189  | 2.750880  |
| H  | -7.011111 | 2.817779  | 3.293752  |
| H  | -5.816081 | 3.257966  | -0.726406 |
| H  | -6.577525 | 0.916702  | -1.156973 |
| H  | -6.030476 | 4.754388  | 2.640064  |
| H  | -5.156650 | 5.111955  | -0.331909 |
| H  | -4.489749 | 7.224016  | 0.093741  |

Monomer solid 3□7 (BCA□NVP)

|    |           |           |           |
|----|-----------|-----------|-----------|
| C  | 1.484625  | -0.202240 | -0.540496 |
| C  | 2.721191  | -0.527847 | -0.943268 |
| C  | 3.711944  | 0.373735  | -0.853395 |
| C  | 3.507039  | 1.615020  | -0.364957 |
| C  | 2.254595  | 1.915913  | 0.032822  |
| C  | 1.253354  | 1.024504  | -0.051036 |
| Br | 0.076752  | -1.461503 | -0.659688 |
| C  | 4.549987  | 2.471100  | -0.302913 |
| C  | 4.545047  | 3.738916  | 0.149324  |
| C  | 5.653481  | 4.524754  | 0.171568  |
| O  | 5.654472  | 5.665885  | 0.578096  |
| N  | -3.176001 | -1.627413 | -0.225900 |
| C  | -2.150015 | -2.325486 | 0.045876  |
| C  | -2.091626 | -2.783581 | 1.497691  |
| C  | -3.552007 | -2.634728 | 1.919291  |
| C  | -4.026005 | -1.508406 | 0.989837  |
| O  | -1.275278 | -2.634264 | -0.759819 |
| C  | -3.548211 | -1.062145 | -1.302814 |
| C  | -4.638838 | -0.311815 | -1.519686 |
| H  | 2.937693  | -1.530544 | -1.349142 |
| H  | 4.712069  | 0.056846  | -1.198098 |
| H  | 1.993278  | 2.903155  | 0.444170  |
| H  | 0.243276  | 1.313436  | 0.286592  |
| H  | 5.525818  | 2.095856  | -0.663022 |
| H  | 3.624420  | 4.208385  | 0.530403  |
| H  | 6.591557  | 4.060048  | -0.212000 |
| H  | -1.713832 | -3.825746 | 1.598416  |
| H  | -1.439892 | -2.086852 | 2.074833  |
| H  | -3.685674 | -2.403898 | 3.000030  |
| H  | -4.100180 | -3.579261 | 1.684146  |
| H  | -5.113128 | -1.650405 | 0.788367  |
| H  | -3.858804 | -0.512049 | 1.464706  |

Monomer solid 4□6 (BDMB□4VP)

|    |            |           |           |
|----|------------|-----------|-----------|
| C  | -5.451254  | -3.500149 | 2.093772  |
| C  | -6.653439  | -3.795929 | 1.618172  |
| N  | -6.950738  | -3.787644 | 0.387069  |
| C  | -6.026467  | -3.878479 | -0.491535 |
| C  | -4.733831  | -3.620492 | -0.117744 |
| C  | -4.423325  | -3.326606 | 1.162063  |
| C  | -3.156061  | -3.116728 | 1.519101  |
| C  | -2.782881  | -2.773977 | 2.773835  |
| C  | -7.684043  | -0.210235 | -0.001820 |
| C  | -6.874304  | 0.628202  | 0.686534  |
| C  | -7.038167  | 2.010303  | 0.653207  |
| C  | -7.982303  | 2.503998  | -0.162739 |
| C  | -8.876964  | 1.732823  | -0.805474 |
| C  | -8.719268  | 0.381851  | -0.678551 |
| Br | -7.461142  | -2.065029 | 0.073572  |
| C  | -6.181472  | 2.642191  | 1.442003  |
| O  | -6.076318  | 3.851044  | 1.598598  |
| O  | -8.118304  | 3.868935  | -0.251688 |
| C  | -7.187482  | 4.524269  | -1.103743 |
| O  | -9.967239  | 2.236490  | -1.557146 |
| C  | -11.294457 | 1.652197  | -1.309121 |
| H  | -5.231877  | -3.549639 | 3.207716  |
| H  | -7.465810  | -4.114061 | 2.284931  |
| H  | -6.311163  | -4.202405 | -1.497820 |
| H  | -3.882860  | -3.743013 | -0.893953 |
| H  | -2.417606  | -3.075345 | 0.737946  |
| H  | -1.682097  | -2.566745 | 3.004231  |
| H  | -3.419160  | -2.683502 | 3.694244  |
| H  | -5.993044  | 0.210152  | 1.134611  |
| H  | -9.458840  | -0.202243 | -1.254473 |
| H  | -5.440024  | 2.002760  | 1.971147  |
| H  | -7.419958  | 4.415346  | -2.187546 |
| H  | -7.172575  | 5.577545  | -0.854129 |
| H  | -6.172177  | 4.044452  | -0.992549 |
| H  | -11.919702 | 2.437201  | -1.751965 |
| H  | -11.337846 | 0.721729  | -1.857496 |
| H  | -11.549070 | 1.412658  | -0.264096 |

Monomer solid 4□7 (BDMB□NVP)

|    |            |           |           |
|----|------------|-----------|-----------|
| C  | -5.311997  | -0.022614 | -0.127533 |
| C  | -5.082972  | -1.261383 | 0.317647  |
| C  | -6.109351  | -2.049853 | 0.688843  |
| C  | -7.393821  | -1.606433 | 0.619781  |
| C  | -7.628057  | -0.343820 | 0.161212  |
| C  | -6.572839  | 0.416544  | -0.197249 |
| Br | -3.867880  | 1.089135  | -0.649150 |
| O  | -8.378444  | -2.490478 | 1.011268  |
| O  | -8.913721  | 0.139152  | 0.082144  |
| C  | -5.782517  | -3.300838 | 1.133757  |
| O  | -6.497409  | -4.196528 | 1.528386  |
| N  | -0.692808  | 1.325242  | -0.086731 |
| C  | -1.447357  | 1.460150  | -1.099577 |
| C  | -0.916037  | 0.769008  | -2.347502 |
| C  | -0.002080  | -0.287141 | -1.729487 |
| C  | 0.424343   | 0.401933  | -0.425101 |
| C  | -0.747589  | 1.830455  | 1.079193  |
| C  | 0.102636   | 1.659500  | 2.102553  |
| C  | -9.162370  | 1.461145  | -0.335559 |
| C  | -9.754624  | -2.224934 | 0.898235  |
| O  | -2.482472  | 2.120440  | -1.129077 |
| H  | -4.036439  | -1.607943 | 0.369604  |
| H  | -6.716275  | 1.442604  | -0.568013 |
| H  | -4.687502  | -3.525847 | 1.132361  |
| H  | -1.721120  | 0.331294  | -2.978930 |
| H  | -0.333588  | 1.512081  | -2.940631 |
| H  | 0.853468   | -0.575549 | -2.380546 |
| H  | -0.602473  | -1.200878 | -1.499460 |
| H  | 0.598859   | -0.378607 | 0.351785  |
| H  | 1.359675   | 0.990043  | -0.585073 |
| H  | -1.607944  | 2.499900  | 1.249847  |
| H  | -0.076546  | 2.172017  | 3.061115  |
| H  | 1.001967   | 1.030558  | 2.054144  |
| H  | -10.263144 | 1.623364  | -0.298225 |
| H  | -8.686816  | 2.186522  | 0.361676  |
| H  | -8.833411  | 1.606373  | -1.388654 |
| H  | -10.295063 | -3.137907 | 1.236123  |
| H  | -10.056425 | -1.400938 | 1.581004  |



|   |           |           |           |    |           |            |           |
|---|-----------|-----------|-----------|----|-----------|------------|-----------|
| C | 5.207503  | 2.958348  | -1.591179 | C  | 9.447876  | 8.302368   | -1.090732 |
| C | 5.510937  | 3.973359  | -0.485701 | C  | 8.848234  | 4.102581   | -2.079246 |
| O | 3.977786  | 1.554848  | 1.448462  | C  | 8.076841  | 3.028129   | -2.340825 |
| C | 5.600437  | 3.728510  | 1.874311  | C  | 8.474178  | 1.863080   | -1.952166 |
| C | 6.399532  | 4.786720  | 2.079329  | C  | 9.678180  | 1.714436   | -1.272590 |
| N | 5.441186  | -1.724290 | 0.226334  | C  | 10.461362 | 2.781982   | -1.093075 |
| C | 4.909210  | -2.206699 | -0.822065 | C  | 9.974692  | 4.015992   | -1.364380 |
| C | 5.504110  | -1.662530 | -2.113656 | Br | 8.306922  | 5.850327   | -2.678897 |
| C | 6.830897  | -1.083727 | -1.628075 | Br | 11.008511 | 5.546030   | -0.984521 |
| C | 6.518178  | -0.772114 | -0.158252 | Br | 7.388552  | 0.341428   | -2.220691 |
| O | 4.000714  | -3.034063 | -0.857200 | Br | 10.319354 | 0.183533   | -0.388646 |
| C | 5.209521  | -1.914249 | 1.462654  | C  | 6.386252  | 4.848513   | 2.672811  |
| C | 5.790298  | -1.331690 | 2.522385  | C  | 5.398816  | 4.584647   | 1.778770  |
| N | -5.096766 | -4.397277 | 0.295841  | C  | 5.794382  | 3.900437   | 0.705445  |
| C | -5.247572 | -3.274427 | -0.278926 | N  | 6.907721  | 3.351828   | 0.476851  |
| C | -6.267008 | -2.370043 | 0.399854  | C  | 7.797975  | 3.572228   | 1.351390  |
| C | -7.034480 | -3.366194 | 1.265947  | C  | 7.637006  | 4.417136   | 2.392839  |
| C | -5.977857 | -4.456169 | 1.493659  | C  | 1.108494  | 8.776662   | -2.189184 |
| O | -4.653624 | -2.911247 | -1.291103 | C  | 5.238737  | 4.951315   | 4.840185  |
| C | -4.356600 | -5.393813 | 0.018238  | C  | 0.502253  | 7.374955   | -1.978284 |
| C | -4.219725 | -6.548040 | 0.687935  | C  | -0.297787 | 6.919051   | -3.239373 |
| N | -4.986012 | 3.169312  | -0.586806 | C  | 0.075486  | 5.557658   | -3.774124 |
| C | -5.186133 | 2.079914  | 0.035297  | C  | 1.229606  | 5.233825   | -4.347225 |
| C | -6.171498 | 1.149782  | -0.658911 | C  | 1.465852  | 3.971381   | -4.784969 |
| C | -6.876107 | 2.108012  | -1.616435 | N  | 0.590344  | 3.064345   | -4.747467 |
| C | -5.794992 | 3.175486  | -1.835724 | C  | -0.553780 | 3.357829   | -4.306997 |
| O | -4.660194 | 1.768611  | 1.100964  | C  | -0.837147 | 4.565705   | -3.742931 |
| C | -4.249352 | 4.170514  | -0.316865 | C  | 2.401786  | 1.495566   | -0.798211 |
| C | -4.057728 | 5.287105  | -1.035132 | C  | 2.857502  | 0.716134   | 0.156216  |
| H | -0.344906 | -2.814625 | -1.055286 | C  | 3.069730  | -0.582295  | -0.056822 |
| H | -0.360375 | 1.489350  | 1.249657  | C  | 2.855764  | -1.120471  | -1.300903 |
| H | 4.027829  | 1.139902  | -1.337112 | C  | 2.391846  | -0.348426  | -2.293494 |
| H | 3.087270  | 2.703750  | -1.187277 | C  | 2.095886  | 0.948866   | -1.981293 |
| H | 4.957899  | 3.426435  | -2.569777 | Br | 2.017096  | 3.324827   | -0.465354 |
| H | 6.078118  | 2.272935  | -1.733071 | Br | 1.343696  | 1.946293   | -3.505030 |
| H | 6.592230  | 4.237835  | -0.544955 | Br | 3.709438  | -1.496073  | 1.592649  |
| H | 4.889729  | 4.892127  | -0.611812 | Br | 3.210215  | -2.882172  | -1.790204 |
| H | 5.295888  | 3.166482  | 2.773688  | C  | 4.548125  | -7.442899  | -0.134206 |
| H | 6.718492  | 5.047229  | 3.101231  | C  | 5.215592  | -6.946880  | -1.431155 |
| H | 6.767448  | 5.446328  | 1.282040  | C  | 6.443444  | -6.041393  | -1.218750 |
| H | 5.632759  | -2.453629 | -2.886046 | C  | 7.277400  | -5.839211  | -2.465608 |
| H | 4.835827  | -0.860720 | -2.505016 | C  | 8.396458  | -4.792029  | -2.289795 |
| H | 7.169477  | -0.194744 | -2.206311 | C  | 7.718452  | -3.410987  | -2.213534 |
| H | 7.619021  | -1.872869 | -1.690591 | C  | 9.296859  | -5.016368  | -1.139620 |
| H | 7.453408  | -0.899617 | 0.434938  | C  | 10.511259 | -3.993624  | -1.067190 |
| H | 6.151549  | 0.274864  | -0.049696 | C  | 11.729977 | -4.539467  | -0.331939 |
| H | 4.417115  | -2.651679 | 1.674363  | C  | 12.557359 | -5.562526  | -1.192207 |
| H | 5.472500  | -1.599731 | 3.542442  | C  | 3.757793  | -8.724713  | -0.477073 |
| H | 6.576965  | -0.568485 | 2.450329  | C  | 3.602542  | -6.268368  | 0.347137  |
| H | -5.728531 | -1.623431 | 1.029114  | C  | 2.460758  | -8.776508  | -0.966546 |
| H | -6.919151 | -1.849362 | -0.336576 | C  | 1.846892  | -9.954405  | -1.122414 |
| H | -7.889097 | -3.781407 | 0.678411  | N  | 2.486894  | -11.022321 | -0.801974 |
| H | -7.429981 | -2.927308 | 2.209394  | C  | 3.697366  | -11.007133 | -0.391880 |
| H | -5.376908 | -4.234803 | 2.408010  | C  | 4.362798  | -9.888469  | -0.131975 |
| H | -6.500422 | -5.433048 | 1.616108  | C  | 7.390593  | -2.820544  | -1.052130 |
| H | -3.747418 | -5.272513 | -0.893794 | C  | 6.579099  | -1.732192  | -1.163365 |
| H | -3.527814 | -7.321619 | 0.318480  | N  | 6.243036  | -1.087829  | -2.232195 |
| H | -4.755488 | -6.787730 | 1.616296  | C  | 6.547203  | -1.746255  | -3.310644 |
| H | -5.604002 | 0.370756  | -1.219512 | C  | 7.290549  | -2.857696  | -3.378406 |
| H | -6.870770 | 0.669095  | 0.061208  | C  | 12.960216 | -4.987575  | -2.586828 |
| H | -7.758142 | 2.559825  | -1.100863 | C  | 13.617175 | -3.853030  | -2.744772 |
| H | -7.221537 | 1.626193  | -2.558608 | C  | 13.927599 | -3.235891  | -3.952267 |
| H | -5.144291 | 2.902710  | -2.700822 | N  | 13.575360 | -3.865118  | -5.030994 |
| H | -6.297402 | 4.149852  | -2.037169 | C  | 13.030620 | -4.989753  | -4.951326 |
| H | -3.695795 | 4.089545  | 0.634288  | C  | 12.652559 | -5.533645  | -3.783068 |
| H | -3.377654 | 6.071067  | -0.665584 | C  | 2.705445  | -6.517503  | 1.589932  |
| H | -4.535586 | 5.484276  | -2.004192 | C  | 13.682442 | -6.104360  | -0.321719 |

Polymer P(5-6) (P(4BB-4VP)) (linker/monomer unit ratio = 1/2)

|   |           |           |           |   |           |           |           |
|---|-----------|-----------|-----------|---|-----------|-----------|-----------|
| C | 3.499133  | 9.369302  | -1.195222 | C | 4.707625  | -1.947754 | 3.068427  |
| C | 4.155239  | 9.458831  | 0.245524  | C | 3.890906  | -2.741507 | 3.689003  |
| C | 5.620391  | 10.088714 | 0.329661  | C | 3.719243  | -4.090761 | 3.610455  |
| C | 6.918511  | 9.297121  | -0.087588 | C | 5.466196  | 3.421921  | 5.144068  |
| C | 7.880014  | 8.800526  | 0.935912  | C | 6.701350  | 3.271905  | 6.120400  |
| C | 9.167021  | 8.344218  | 0.230030  | C | 7.170092  | 1.814826  | 6.369909  |
| C | 7.289290  | 7.604630  | 1.709068  | C | 14.628380 | -6.857764 | -1.192114 |
| C | 6.893505  | 8.018132  | 3.138803  | C | 15.648187 | -7.676690 | -0.380751 |
| C | 5.741152  | 7.134892  | 3.724494  | C | 15.062055 | -9.002050 | 0.293204  |
| C | 6.229100  | 5.677860  | 3.922626  | C | 7.806023  | 1.265304  | 5.164170  |
| C | 4.077465  | 8.158761  | -1.971491 | C | 14.251597 | -8.923784 | 1.547475  |
| C | 1.994114  | 9.274548  | -1.001983 | C | 9.104814  | 1.527544  | 4.947214  |
| C | 3.842234  | 6.841494  | -1.588028 | C | 9.759933  | 1.083222  | 3.813971  |
| C | 4.364578  | 5.889710  | -2.363723 | N | 9.160773  | 0.442137  | 2.910822  |
| N | 5.026575  | 6.022886  | -3.418884 | C | 7.877194  | 0.345851  | 3.027666  |
| C | 5.228245  | 7.179088  | -3.807104 | C | 7.233284  | 0.546322  | 4.196666  |
| C | 4.740676  | 8.259300  | -3.117852 | C | 13.058545 | -9.546385 | 1.585216  |
| C | 10.171889 | 8.045183  | 1.072966  | C | 12.400553 | -9.623632 | 2.699705  |
| C | 11.289128 | 7.452566  | 0.598522  | N | 12.718026 | -9.082166 | 3.798180  |
| N | 11.533283 | 7.326419  | -0.657829 | C | 13.944752 | -8.674659 | 3.871969  |
| C | 10.697614 | 7.899681  | -1.434792 | C | 14.678876 | -8.544416 | 2.782070  |

|    |           |           |           |   |           |            |           |
|----|-----------|-----------|-----------|---|-----------|------------|-----------|
| C  | 11.658600 | -3.342710 | 4.044657  | H | 6.123676  | -5.119324  | -0.773322 |
| C  | 11.985368 | -4.654417 | 4.037668  | H | 6.567756  | -5.545667  | -3.305882 |
| C  | 11.145316 | -5.688908 | 3.913896  | H | 7.741717  | -6.828962  | -2.810121 |
| C  | 9.916642  | -5.424859 | 3.466207  | H | 9.015556  | -4.611159  | -3.236947 |
| C  | 9.551554  | -4.134582 | 3.362922  | H | 8.743418  | -4.993771  | -0.142554 |
| C  | 10.347819 | -3.081946 | 3.668376  | H | 9.703349  | -6.058791  | -1.105460 |
| Br | 12.820581 | -1.883076 | 4.328976  | H | 10.713157 | -3.925359  | -2.111288 |
| Br | 9.671181  | -1.263036 | 3.362984  | H | 10.179889 | -3.024349  | -0.797286 |
| Br | 11.822944 | -7.496135 | 3.939710  | H | 12.417229 | -3.696688  | -0.056920 |
| Br | 8.703656  | -6.688888 | 2.774762  | H | 11.389249 | -4.859941  | 0.701535  |
| H  | 3.689581  | 10.295684 | -1.781586 | H | 11.913339 | -6.451777  | -1.451985 |
| H  | 3.529155  | 10.092241 | 0.856746  | H | 4.284147  | -5.410111  | 0.611154  |
| H  | 4.333612  | 8.515269  | 0.734669  | H | 2.907999  | -5.964025  | -0.475889 |
| H  | 5.488960  | 11.033747 | -0.252607 | H | 1.976515  | -7.864170  | -1.233566 |
| H  | 5.824769  | 10.317942 | 1.431141  | H | 0.808960  | -10.107509 | -1.578545 |
| H  | 6.570172  | 8.510459  | -0.810752 | H | 4.187845  | -11.960683 | -0.239838 |
| H  | 7.498804  | 10.076081 | -0.697147 | H | 5.363542  | -9.914754  | 0.185460  |
| H  | 8.217087  | 9.555439  | 1.590699  | H | 7.575171  | -3.095101  | 0.022861  |
| H  | 6.464602  | 7.079980  | 1.182675  | H | 6.181369  | -1.298836  | -0.195363 |
| H  | 7.918982  | 6.721607  | 1.717915  | H | 5.999969  | -1.378781  | -4.214652 |
| H  | 7.772575  | 8.116640  | 3.821456  | H | 7.440079  | -3.356308  | -4.326263 |
| H  | 6.380834  | 8.980211  | 3.104842  | H | 13.966293 | -3.298934  | -1.809414 |
| H  | 5.423226  | 7.423017  | 4.716273  | H | 14.478451 | -2.315819  | -4.077081 |
| H  | 4.794535  | 7.184702  | 3.148612  | H | 12.786367 | -5.381367  | -5.936767 |
| H  | 7.181310  | 5.552125  | 4.525545  | H | 12.128887 | -6.526178  | -3.829699 |
| H  | 1.694662  | 10.348654 | -0.752668 | H | 2.211522  | -5.540173  | 1.842323  |
| H  | 1.604676  | 8.583197  | -0.185546 | H | 1.902332  | -7.324734  | 1.297408  |
| H  | 3.357086  | 6.512578  | -0.644863 | H | 13.243955 | -6.544832  | 0.635636  |
| H  | 4.204992  | 4.796198  | -2.078265 | H | 14.189577 | -5.207522  | 0.115803  |
| H  | 5.985916  | 7.477534  | -4.555257 | H | 2.883215  | -7.236619  | 3.578931  |
| H  | 4.998946  | 9.254525  | -3.519558 | H | 3.817020  | -8.105885  | 2.519911  |
| H  | 10.081747 | 8.055993  | 2.135009  | H | 5.031417  | -6.431925  | 4.133020  |
| H  | 12.031118 | 6.978102  | 1.263743  | H | 5.536255  | -6.571290  | 2.370367  |
| H  | 10.957491 | 8.103879  | -2.546805 | H | 6.514639  | -4.466185  | 1.816017  |
| H  | 8.689571  | 8.666453  | -1.900532 | H | 6.396137  | -1.968681  | 2.162706  |
| H  | 7.081689  | 3.100795  | -2.817064 | H | 3.309235  | -2.256103  | 4.492423  |
| H  | 11.425886 | 2.666787  | -0.533223 | H | 3.005867  | -4.766670  | 4.197454  |
| H  | 4.396798  | 4.995767  | 1.884641  | H | 4.550149  | 2.936809   | 5.537520  |
| H  | 5.017621  | 3.660463  | -0.026696 | H | 5.598574  | 2.910441   | 4.150733  |
| H  | 8.817301  | 3.054516  | 1.175797  | H | 7.473149  | 3.977079   | 5.779734  |
| H  | 8.491997  | 4.619688  | 3.065283  | H | 6.238445  | 3.756771   | 7.081025  |
| H  | 1.593626  | 8.769071  | -3.125718 | H | 6.211653  | 1.185315   | 6.575550  |
| H  | 0.377998  | 9.546017  | -2.427496 | H | 7.717585  | 1.757633   | 7.426808  |
| H  | 5.118762  | 5.350836  | 5.853867  | H | 14.049515 | -7.559840  | -1.774050 |
| H  | 4.304965  | 5.162766  | 4.372664  | H | 15.173391 | -6.165328  | -1.862906 |
| H  | -0.203255 | 7.224907  | -1.050818 | H | 16.297578 | -8.145814  | -1.204803 |
| H  | 1.342888  | 6.663623  | -1.832754 | H | 16.303862 | -7.162614  | 0.301466  |
| H  | -1.374838 | 7.074231  | -2.901769 | H | 14.623026 | -9.611926  | -0.516703 |
| H  | -0.003004 | 7.645865  | -4.039876 | H | 16.049859 | -9.484177  | 0.568922  |
| H  | 2.019708  | 5.995231  | -4.413694 | H | 9.676135  | 2.132911   | 5.575343  |
| H  | 2.399438  | 3.715148  | -5.307141 | H | 10.868146 | 1.393230   | 3.647094  |
| H  | -1.341124 | 2.566915  | -4.187064 | H | 7.319725  | 0.074995   | 2.090919  |
| H  | -1.885508 | 4.781381  | -3.366288 | H | 6.128400  | 0.512385   | 4.277630  |
| H  | 3.140241  | 1.326379  | 1.057791  | H | 12.626244 | -10.154626 | 0.746758  |
| H  | 2.266082  | -0.544467 | -3.355265 | H | 11.458124 | -10.287814 | 2.671779  |
| H  | 5.271143  | -7.651770 | 0.646155  | H | 14.300833 | -8.487568  | 4.859048  |
| H  | 4.458578  | -6.348767 | -2.054050 | H | 15.686387 | -8.314086  | 2.837337  |
| H  | 5.512229  | -7.810842 | -2.042125 | H | 13.019664 | -4.867761  | 4.358449  |
| H  | 7.011927  | -6.495873 | -0.360647 | H | 8.468577  | -3.895534  | 3.121643  |

---

## References

- 1 H. T. Le, C.-G. Wang and A. Goto, *Angew. Chem. Int. Ed.*, 2020, **59**, 9360–9364.
- 2 Gaussian 09, Revision A.02, M. J. Frisch, G. W. Trucks, H. B. Schlegel, G. E. Scuseria, M. A. Robb, J. R. Cheeseman, G. Scalmani, V. Barone, B. Mennucci, G. A. Petersson, H. Nakatsuji, M. Caricato, X. Li, H. P. Hratchian, A. F. Izmaylov, J. Bloino, G. Zheng, J. L. Sonnenberg, M. Hada, M. Ehara, K. Toyota, R. Fukuda, J. Hasegawa, M. Ishida, T. Nakajima, Y. Honda, O. Kitao, H. Nakai, T. Vreven, J. A. Montgomery, Jr., J. E. Peralta, F. Ogliaro, M. Bearpark, J. J. Heyd, E. Brothers, K. N. Kudin, V. N. Staroverov, R. Kobayashi, J. Normand, K. Raghavachari, A. Rendell, J. C. Burant, S. S. Iyengar, J. Tomasi, M. Cossi, N. Rega, J. M. Millam, M. Klene, J. E. Knox, J. B. Cross, V. Bakken, C. Adamo, J. Jaramillo, R. Gomperts, R. E. Stratmann, O. Yazyev, A. J. Austin, R. Cammi, C. Pomelli, J. W. Ochterski, R. L. Martin, K. Morokuma, V. G. Zakrzewski, G. A. Voth, P. Salvador, J. J. Dannenberg, S. Dapprich, A. D. Daniels, O. Farkas, J. B. Foresman, J. V. Ortiz, J. Cioslowski, and D. J. Fox, Gaussian, Inc., Wallingford CT, 2009.

## Author Information

ORCID of Hong Tho Le: 0000-0002-0043-1404

ORCID of Atsushi Goto: 0000-0001-7643-3169
